# Supplementary material for: Structural, dielectric, and conduction behaviour of A-site deficient Sr x Na 1−2 x NbO 3 ceramics
Source: Royal Society of Chemistry journal article supplement (doi:10.1039/d4tc02433h), 2024-01-01
Supplement: d4tc02433h1.pdf [file d4tc02433h1.pdf]

## **Structural, Dielectric, and Conduction Behaviour of A-site deficient Sr<sub>x</sub>Na<sub>1-2x</sub>NbO<sub>3</sub> Ceramics**

Thomas E. Hooper<sup>1</sup> and Derek C. Sinclair

Department of Materials Science and Engineering, Sir Robert Hadfield Building,  
University of Sheffield, Mappin Street, Sheffield S1 3JD, UK

## **Supplementary Information**

### **Contents**

|                                                                |          |
|----------------------------------------------------------------|----------|
| <b>List of Figures</b> .....                                   | <b>2</b> |
| <b>List of Tables</b> .....                                    | <b>4</b> |
| SI Section S1: Analysis of reagents.....                       | 5        |
| SI Section S2: Analysis of calcined powders.....               | 7        |
| SI Section S3: X-ray diffraction and Rietveld Refinements..... | 10       |
| SI Section S4: Microstructural Analysis.....                   | 14       |
| SI Section S5: Dielectric Spectroscopy.....                    | 29       |
| SI Section S6: Polarisation vs Electric Field analysis.....    | 35       |
| SI Section S7: Impedance Spectroscopy and Arrhenius plots..... | 36       |

---

<sup>1</sup> Corresponding author: thomas.elliott.hooper@gmail.com

## **List of Figures**

Figure S1: Secondary electron images of reagents (a) SrCO<sub>3</sub>, (b) Na<sub>2</sub>CO<sub>3</sub>, and (c) Nb<sub>2</sub>O<sub>5</sub> after dehydration.

Figure S2: Stacked X-ray diffraction patterns from 10-100° 2θ (Cu-Kα source) of (a) SrCO<sub>3</sub> (fully indexed to orthorhombic *Pnma*), (b) Na<sub>2</sub>CO<sub>3</sub> (fully indexed to orthorhombic *Pca2*<sub>1</sub>), and (c) Nb<sub>2</sub>O<sub>5</sub> (fully indexed to orthorhombic *C2/c*) reagents after dehydration.

Figure S3: Particle size distributions of powders used for pressing for (a) NaNbO<sub>3</sub> (x = 0.00), (b) Sr<sub>0.05</sub>Na<sub>0.90</sub>NbO<sub>3</sub> (x = 0.05), (c) Sr<sub>0.10</sub>Na<sub>0.80</sub>NbO<sub>3</sub> (x = 0.10), (d) Sr<sub>0.15</sub>Na<sub>0.70</sub>NbO<sub>3</sub> (x = 0.15), (e) Sr<sub>0.20</sub>Na<sub>0.60</sub>NbO<sub>3</sub> (x = 0.20), and (f) Sr<sub>0.25</sub>Na<sub>0.50</sub>NbO<sub>3</sub> (x = 0.25). 500 particles across 3 secondary electron micrographs were measured.

Figure S4: Average d<sub>10</sub>, d<sub>50</sub>, and d<sub>90</sub> against composition for powders used for pressing. Dotted and dashed lines represent ± 1 and ± 2 standard deviations (σ), respectively.

Figure S5: XRD patterns from 10-100° 2θ and step size 0.02° for calcined powders after first and second calcination for all compositions.

Figure S6: Rietveld refinements for (a) NaNbO<sub>3</sub>, (b) Sr<sub>0.05</sub>Na<sub>0.90</sub>NbO<sub>3</sub>, (c) Sr<sub>0.10</sub>Na<sub>0.80</sub>NbO<sub>3</sub>, (d) Sr<sub>0.15</sub>Na<sub>0.70</sub>NbO<sub>3</sub>, (e) Sr<sub>0.20</sub>Na<sub>0.60</sub>NbO<sub>3</sub>, and (f) Sr<sub>0.25</sub>Na<sub>0.50</sub>NbO<sub>3</sub>

Figure S7: Pseudo-monoclinic tilt angle ( $2\tan^{-1}(c_0/b_0)$ , where c<sub>0</sub> and b<sub>0</sub> represent the orthorhombic lattice parameters) against composition.

Figure S8: Geometric density, theoretical density calculated using lattice parameters from XRD refinements, and relative density against composition. Error bars correspond to standard error from the measurements of 5 samples.

Figure S9: Secondary electron micrographs of polished and thermally etched samples for compositions (a) NaNbO<sub>3</sub>, (b) Sr<sub>0.05</sub>Na<sub>0.90</sub>NbO<sub>3</sub>, (c) Sr<sub>0.10</sub>Na<sub>0.80</sub>NbO<sub>3</sub>, (d) Sr<sub>0.15</sub>Na<sub>0.70</sub>NbO<sub>3</sub>, (e) Sr<sub>0.20</sub>Na<sub>0.60</sub>NbO<sub>3</sub>, and (f) Sr<sub>0.25</sub>Na<sub>0.50</sub>NbO<sub>3</sub>. Particle size determined by measuring 200 individual particles across 3 secondary electron micrographs using ImageJ software.

Figure S10: Backscatter electron micrographs and corresponding EDX maps of polished and thermally etched samples of (a) NaNbO<sub>3</sub>, (b) Sr<sub>0.05</sub>Na<sub>0.90</sub>NbO<sub>3</sub>, (c) Sr<sub>0.10</sub>Na<sub>0.80</sub>NbO<sub>3</sub>, (d) Sr<sub>0.15</sub>Na<sub>0.70</sub>NbO<sub>3</sub>, (e) Sr<sub>0.20</sub>Na<sub>0.60</sub>NbO<sub>3</sub>, and (f) Sr<sub>0.25</sub>Na<sub>0.50</sub>NbO<sub>3</sub>. Bright regions in (c) and (d) can be identified as NaNb<sub>3</sub>O<sub>8</sub> and in (f) as tetragonal tungsten bronze Sr<sub>2</sub>NaNb<sub>5</sub>O<sub>15</sub>

Figure S11: Backscattered electron micrograph of polished and thermally etched Sr<sub>0.10</sub>Na<sub>0.80</sub>NbO<sub>3</sub> bulk ceramic, annotated with point spectra positions.

Figure S12: Backscattered electron micrograph of polished and thermally etched  $\text{Sr}_{0.15}\text{Na}_{0.70}\text{NbO}_3$  bulk ceramic, annotated with point spectra positions.

Figure S13: Point spectra across a grain in polished and thermally etched  $\text{Sr}_{0.20}\text{Na}_{0.60}\text{NbO}_3$  and corresponding atomic percentage to demonstrate core-shell microstructure.

Figure S14: Backscattered electron micrograph of polished and thermally etched  $\text{Sr}_{0.25}\text{Na}_{0.50}\text{NbO}_3$  bulk ceramic, annotated with point spectra positions.

Figure S15:  $\text{Sr}^{2+}$  and  $\text{Na}^+$  occupancies extracted from Rietveld refinements (solid data points) and average at% calculated from EDX mapping (hollow data points) against composition. Dashed lines correspond to nominal  $\text{Sr}_x\text{Na}_{1-2x}\text{NbO}_3$

Figure S16: (a) Real component of permittivity ( $\epsilon'$ ) and (b)  $\tan \delta$  at fixed frequencies against temperature for  $\text{NaNbO}_3$  ( $x = 0.00$ )

Figure S17: (a) Real component of permittivity ( $\epsilon'$ ) and (b)  $\tan \delta$  at fixed frequencies against temperature for  $\text{Sr}_{0.05}\text{Na}_{0.90}\text{NbO}_3$  ( $x = 0.05$ ). Sub-zero  $\tan \delta$  are due to electrical noise (inductance) from electrical testing equipment.

Figure S18: (a) Real component of permittivity ( $\epsilon'$ ) and (b)  $\tan \delta$  at fixed frequencies against temperature for  $\text{Sr}_{0.10}\text{Na}_{0.80}\text{NbO}_3$  ( $x = 0.10$ )

Figure S19: (a) Real component of permittivity ( $\epsilon'$ ) and (b)  $\tan \delta$  at fixed frequencies against temperature for  $\text{Sr}_{0.15}\text{Na}_{0.70}\text{NbO}_3$  ( $x = 0.15$ )

Figure S20: (a) Real component of permittivity ( $\epsilon'$ ) and (b)  $\tan \delta$  at fixed frequencies against temperature for  $\text{Sr}_{0.20}\text{Na}_{0.60}\text{NbO}_3$  ( $x = 0.20$ )

Figure S21: (a) Real component of permittivity ( $\epsilon'$ ) and (b)  $\tan \delta$  at fixed frequencies against temperature for  $\text{Sr}_{0.25}\text{Na}_{0.50}\text{NbO}_3$  ( $x = 0.25$ )

Figure S22: Arrhenius plots of conductivity calculated using  $M''$  peak height at the relaxation frequency for (a)  $\text{NaNbO}_3$ , (b)  $\text{Sr}_{0.05}\text{Na}_{0.90}\text{NbO}_3$ , (c)  $\text{Sr}_{0.10}\text{Na}_{0.80}\text{NbO}_3$ , (d)  $\text{Sr}_{0.15}\text{Na}_{0.70}\text{NbO}_3$ , (e)  $\text{Sr}_{0.20}\text{Na}_{0.60}\text{NbO}_3$ , and (f)  $\text{Sr}_{0.25}\text{Na}_{0.50}\text{NbO}_3$ .

Figure S23: High temperature and low temperature activation energies extrapolated from Arrhenius plots of conductivity against composition.

## **List of Tables**

Table S1: Spectrum number according to Figure S11, and corresponding atomic percentage of ions. Highlighted cells correspond to regions of bright contrast.

Table S2: Spectrum number according to Figure S12, and corresponding atomic percentage of ions. Highlighted cells correspond to regions of bright contrast.

Table S3: Spectrum number according to Figure S14, and corresponding atomic percentage of ions. Highlighted cells correspond to regions of bright contrast.

Table S4: Maximum polarisation ( $P_{\text{Iax}}$ ), remnant polarisation ( $P_{\text{R}}$ ), coercive field ( $E_{\text{C}}$ ), recoverable energy density ( $W_{\text{rec}}$ ), energy loss density ( $W_{\text{loss}}$ ), thickness ( $S$ ) over electrode radius ( $r$ ), and efficiency ( $W_{\text{rec}}/W_{\text{rec}}+W_{\text{loss}}$ ) for  $\text{Sr}_x\text{Na}_{1-2x}\text{NbO}_3$  ( $x = 0.00, 0.05, 0.10, 0.15, 0.20, 0.25$ ) at  $40 \text{ kV.cm}^{-1}$



## SI Section S1: Analysis of Reagents

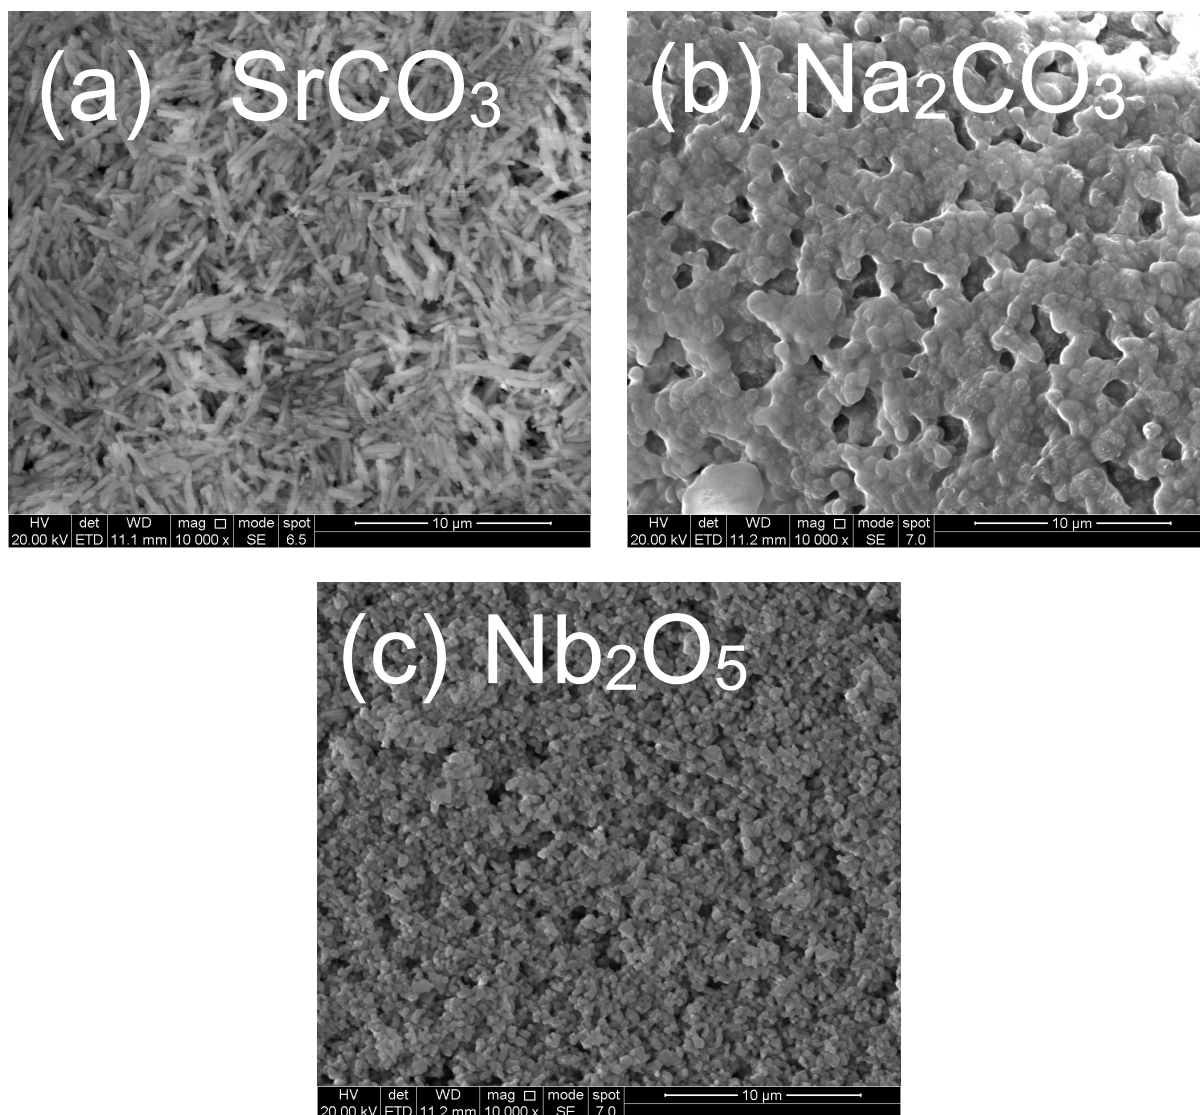

Figure S1: Secondary electron images of reagents (a)  $\text{SrCO}_3$ , (b)  $\text{Na}_2\text{CO}_3$ , and (c)  $\text{Nb}_2\text{O}_5$  after dehydration.

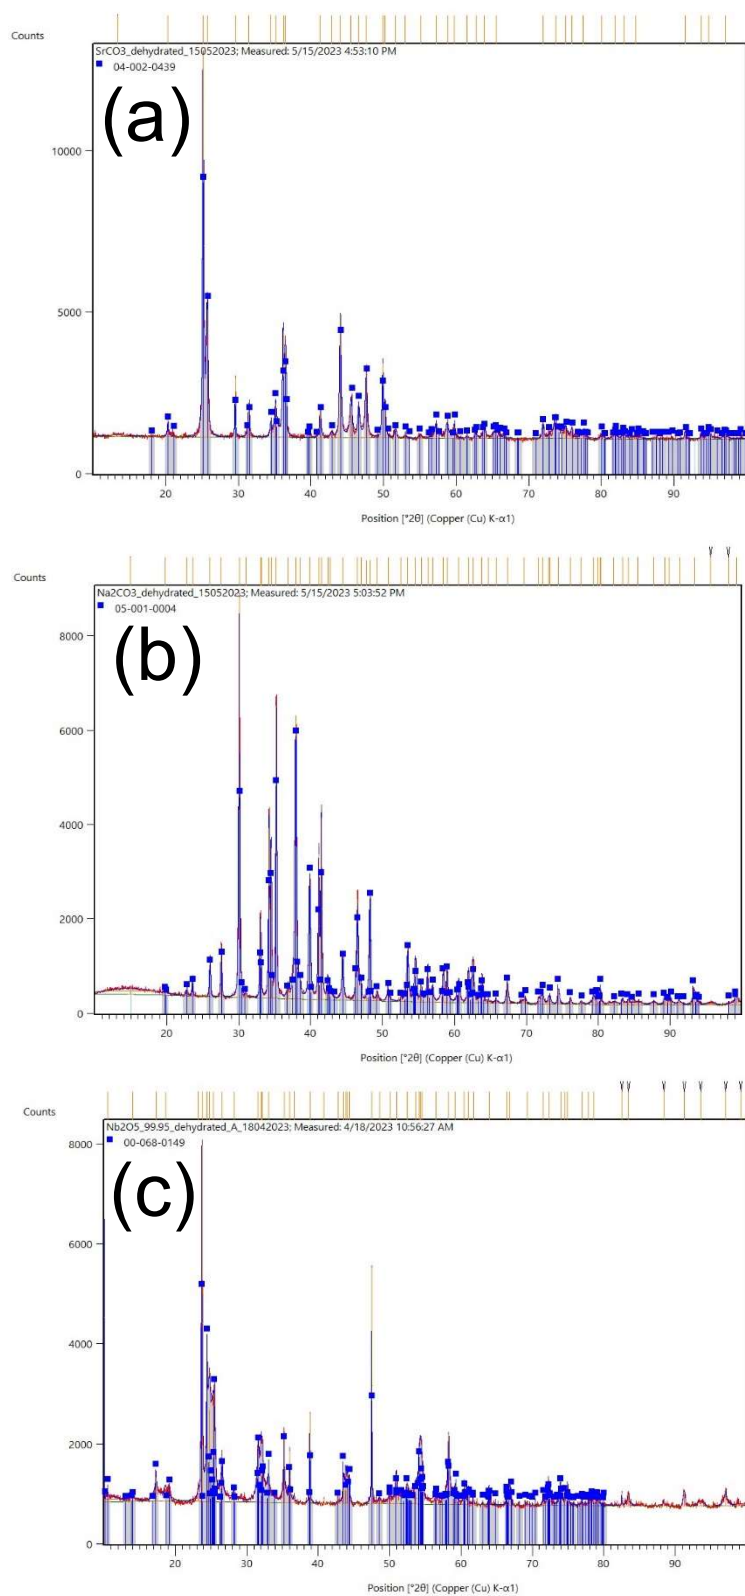

Figure S2: Stacked X-ray diffraction patterns from 10-100° 2θ (Cu-Kα source) of (a) SrCO<sub>3</sub> (fully indexed to orthorhombic *Pnma*), (b) Na<sub>2</sub>CO<sub>3</sub> (fully indexed to orthorhombic *Pca2*<sub>1</sub>), and (c) Nb<sub>2</sub>O<sub>5</sub> (fully indexed to orthorhombic *C2/c*) reagents after dehydration.

## SI Section S2: Analysis of calcined powders

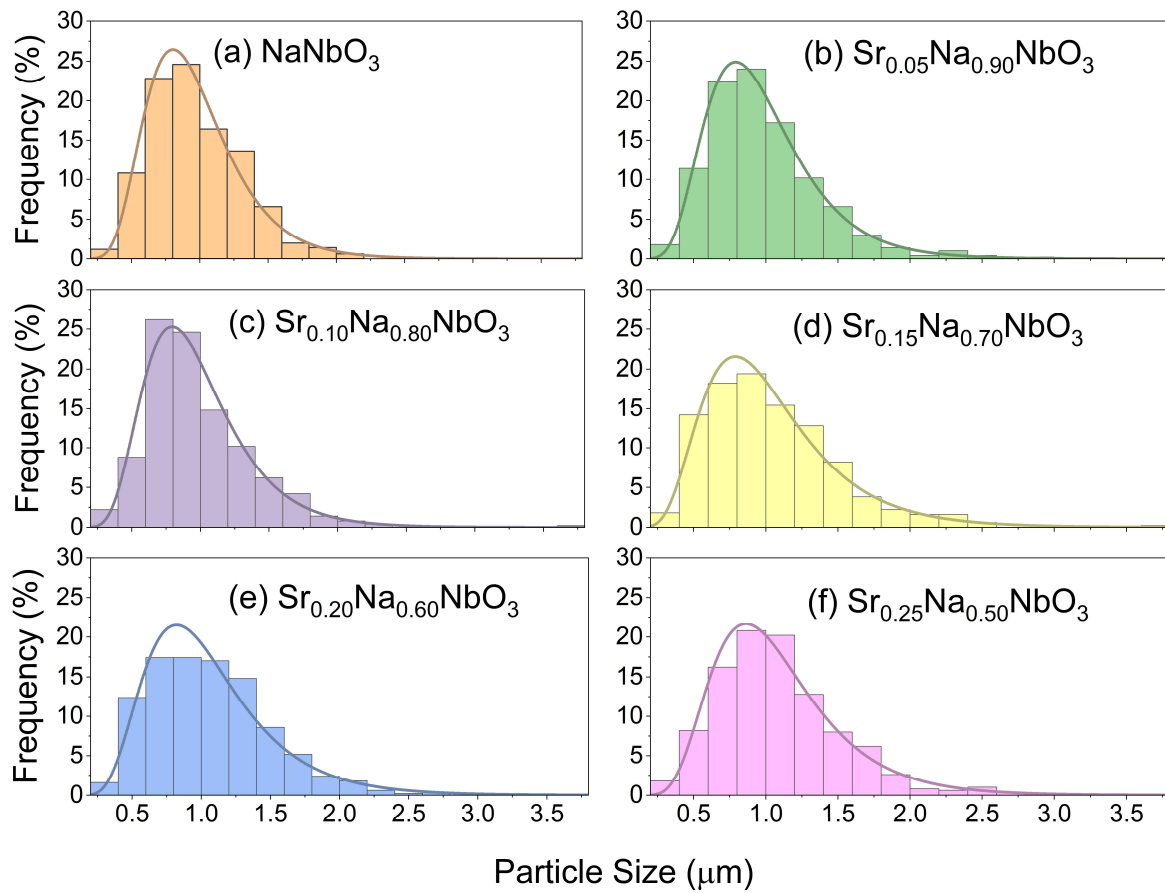

Figure S3: Particle size distributions of powders used for pressing for (a)  $\text{NaNbO}_3$  ( $x = 0.00$ ), (b)  $\text{Sr}_{0.05}\text{Na}_{0.90}\text{NbO}_3$  ( $x = 0.05$ ), (c)  $\text{Sr}_{0.10}\text{Na}_{0.80}\text{NbO}_3$  ( $x = 0.10$ ), (d)  $\text{Sr}_{0.15}\text{Na}_{0.70}\text{NbO}_3$  ( $x = 0.15$ ), (e)  $\text{Sr}_{0.20}\text{Na}_{0.60}\text{NbO}_3$  ( $x = 0.20$ ), and (f)  $\text{Sr}_{0.25}\text{Na}_{0.50}\text{NbO}_3$  ( $x = 0.25$ ). 500 particles across 3 secondary electron micrographs were measured.

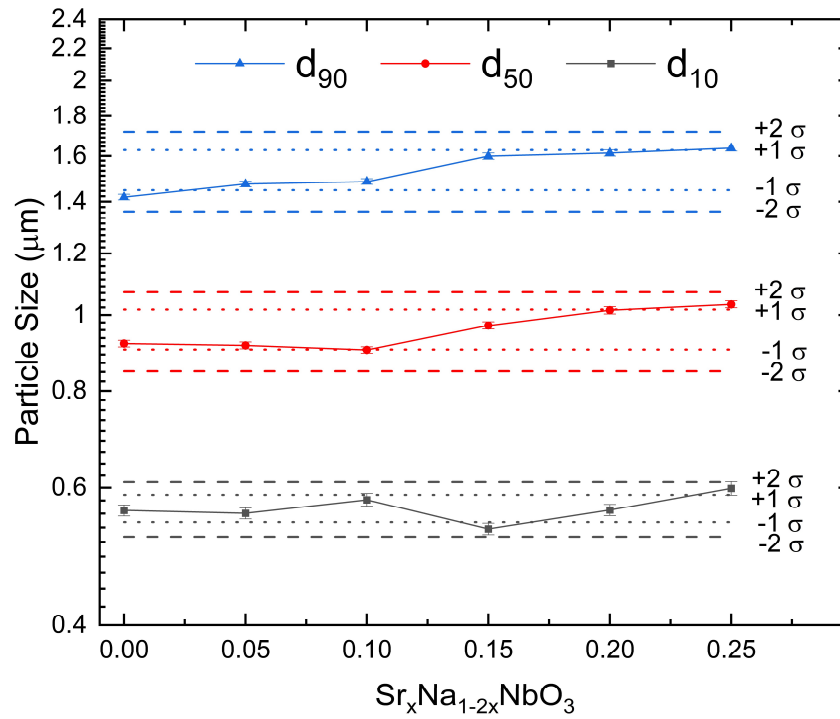

Figure S4: Average  $d_{10}$ ,  $d_{50}$ , and  $d_{90}$  against composition for powders used for pressing. Dotted and dashed lines represent  $\pm 1$  and  $\pm 2$  standard deviations ( $\sigma$ ), respectively.

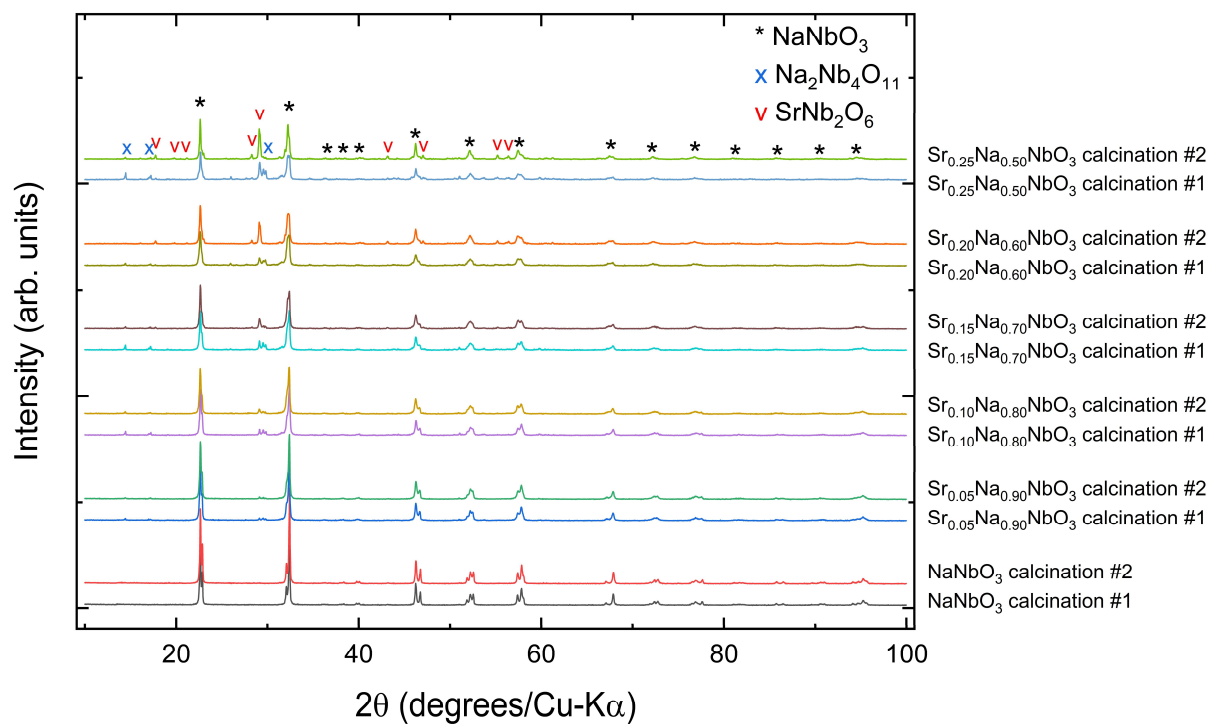

Figure S5: XRD patterns from 10-100° 2θ and step size 0.02° for calcined powders after first and second calcination for all compositions.

### SI Section S3: X-ray diffraction and Rietveld Refinements

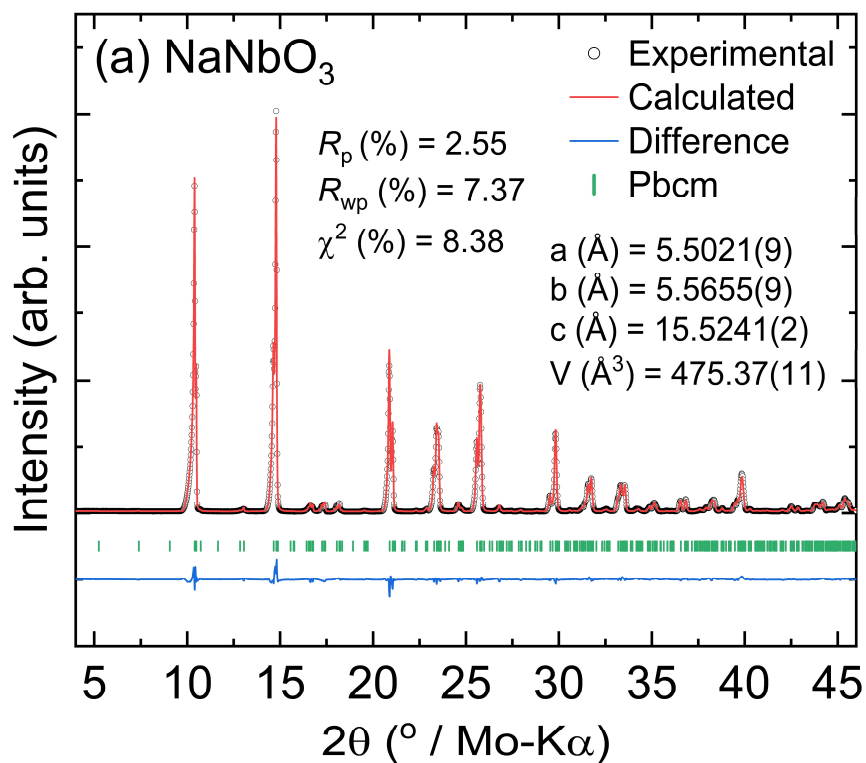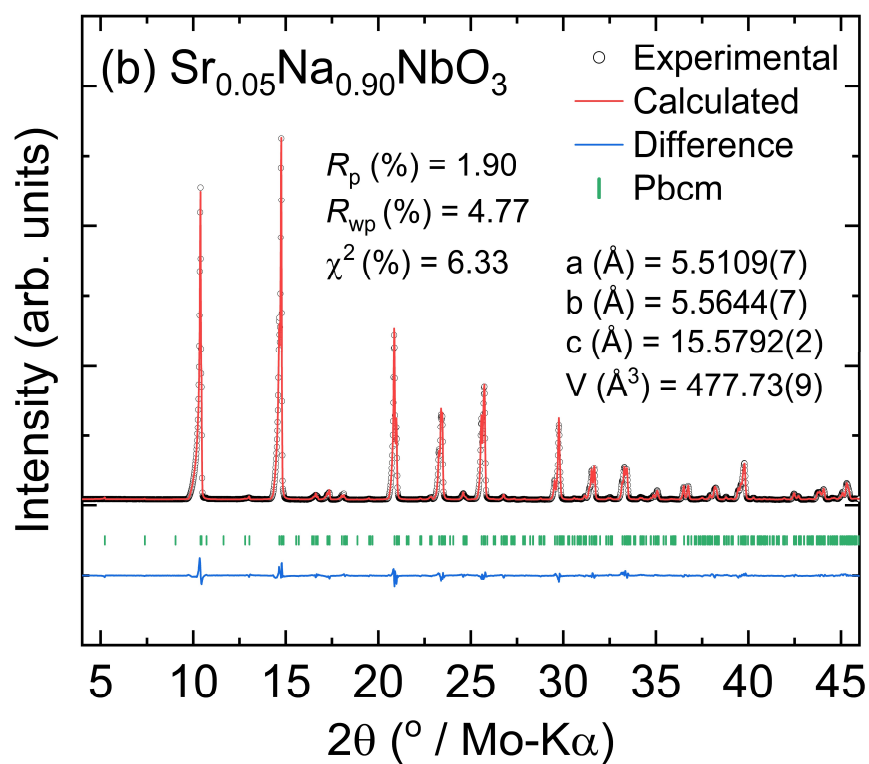

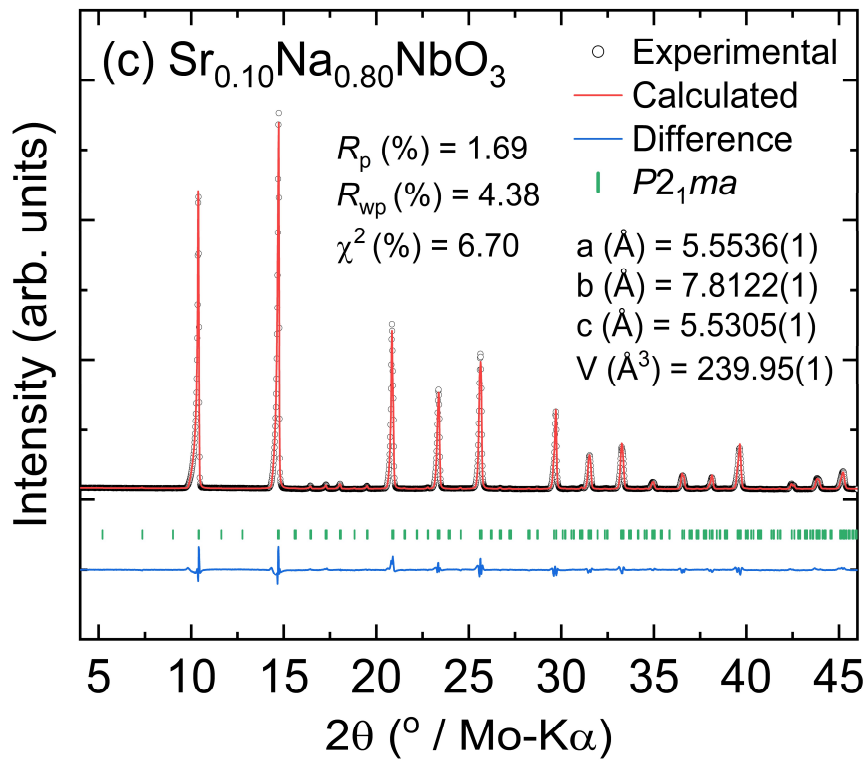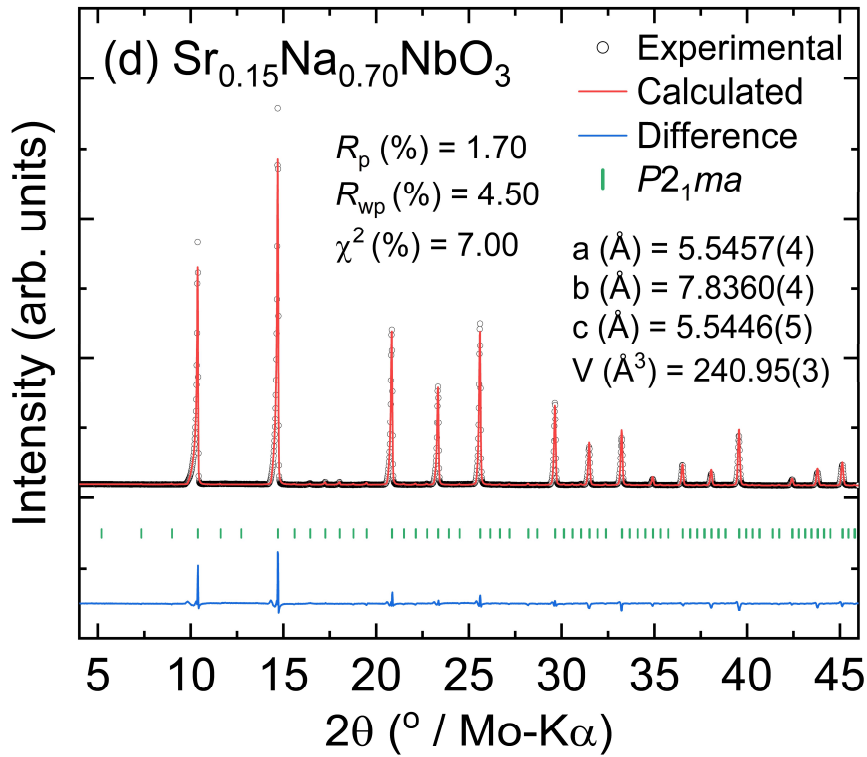

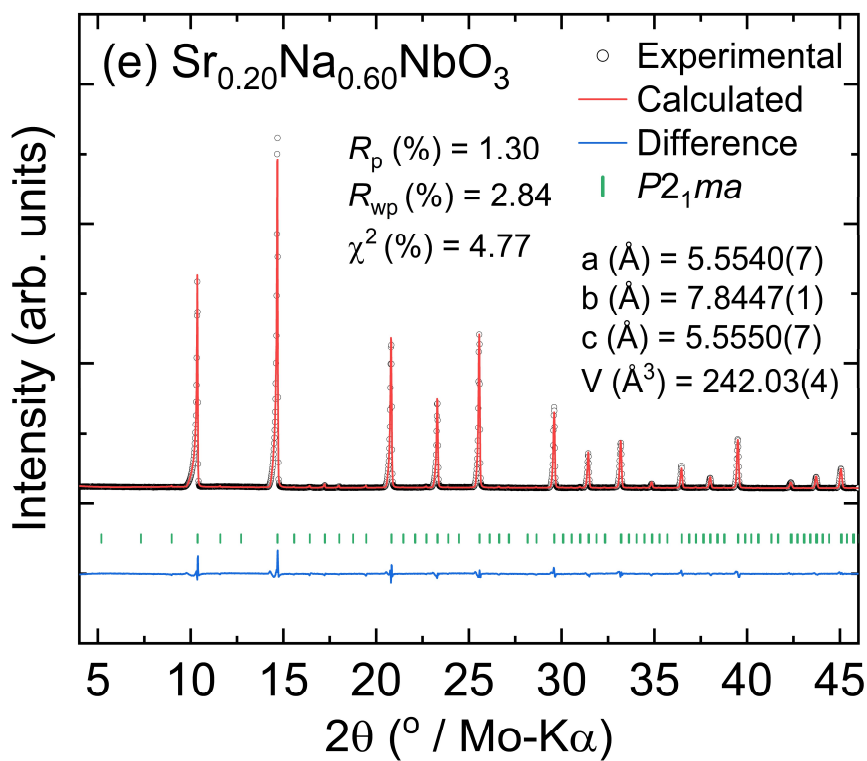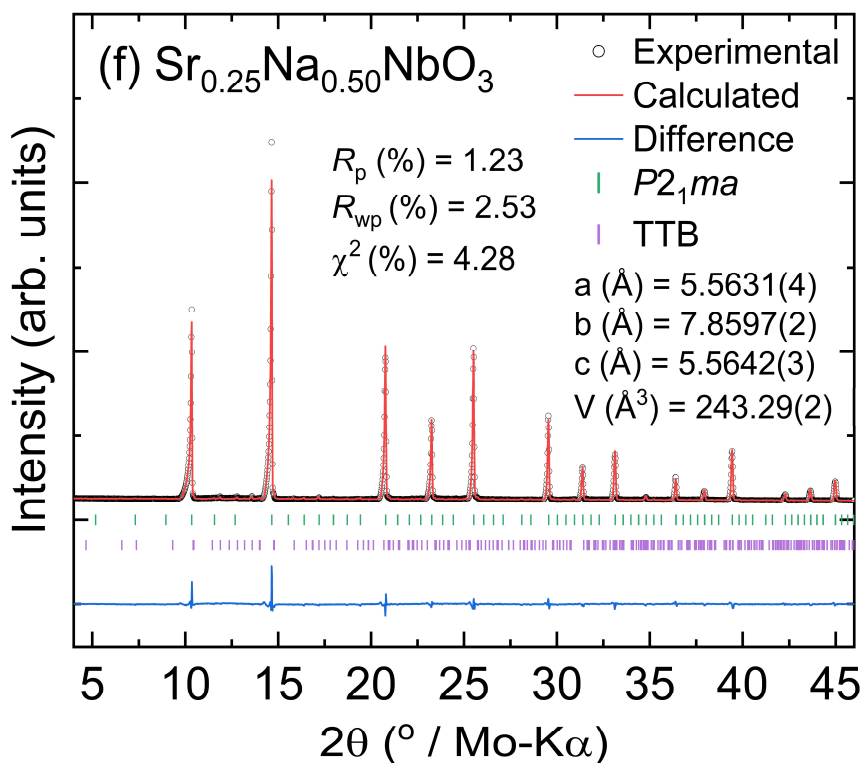

Figure S6: Rietveld refinements for (a)  $\text{NaNbO}_3$ , (b)  $\text{Sr}_{0.05}\text{Na}_{0.90}\text{NbO}_3$ , (c)  $\text{Sr}_{0.10}\text{Na}_{0.80}\text{NbO}_3$ , (d)  $\text{Sr}_{0.15}\text{Na}_{0.70}\text{NbO}_3$ , (e)  $\text{Sr}_{0.20}\text{Na}_{0.60}\text{NbO}_3$ , and (f)  $\text{Sr}_{0.25}\text{Na}_{0.50}\text{NbO}_3$



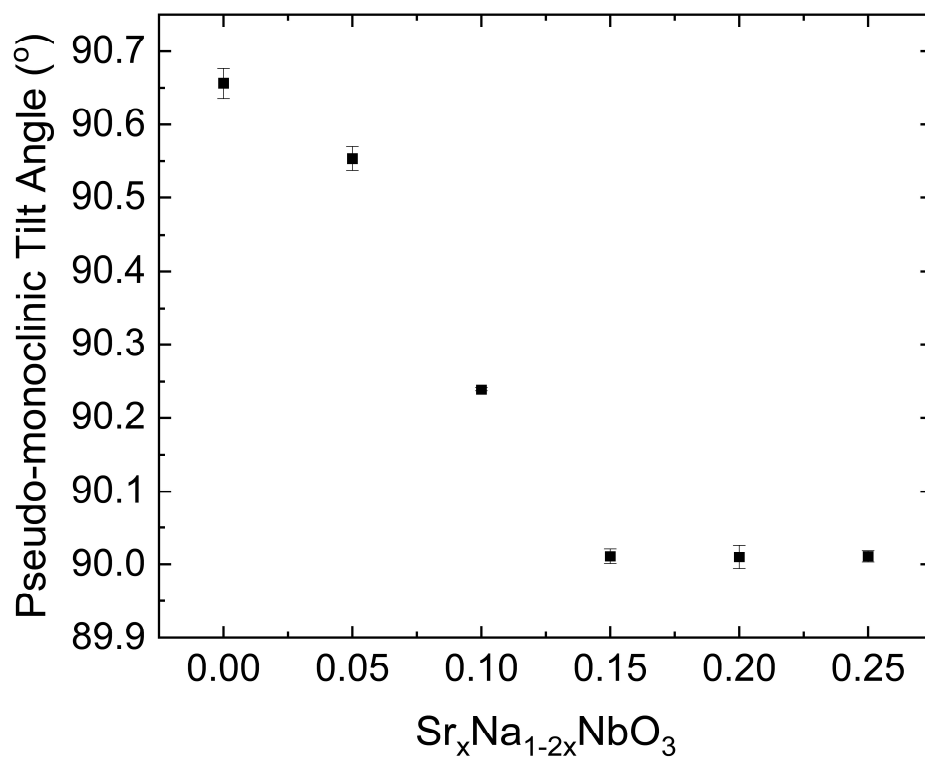

Figure S7: Pseudo-monoclinic tilt angle ( $2\tan^{-1}(c_0/b_0)$ , where  $c_0$  and  $b_0$  represent the orthorhombic lattice parameters) against composition.

### SI Section S4: Microstructural Analysis

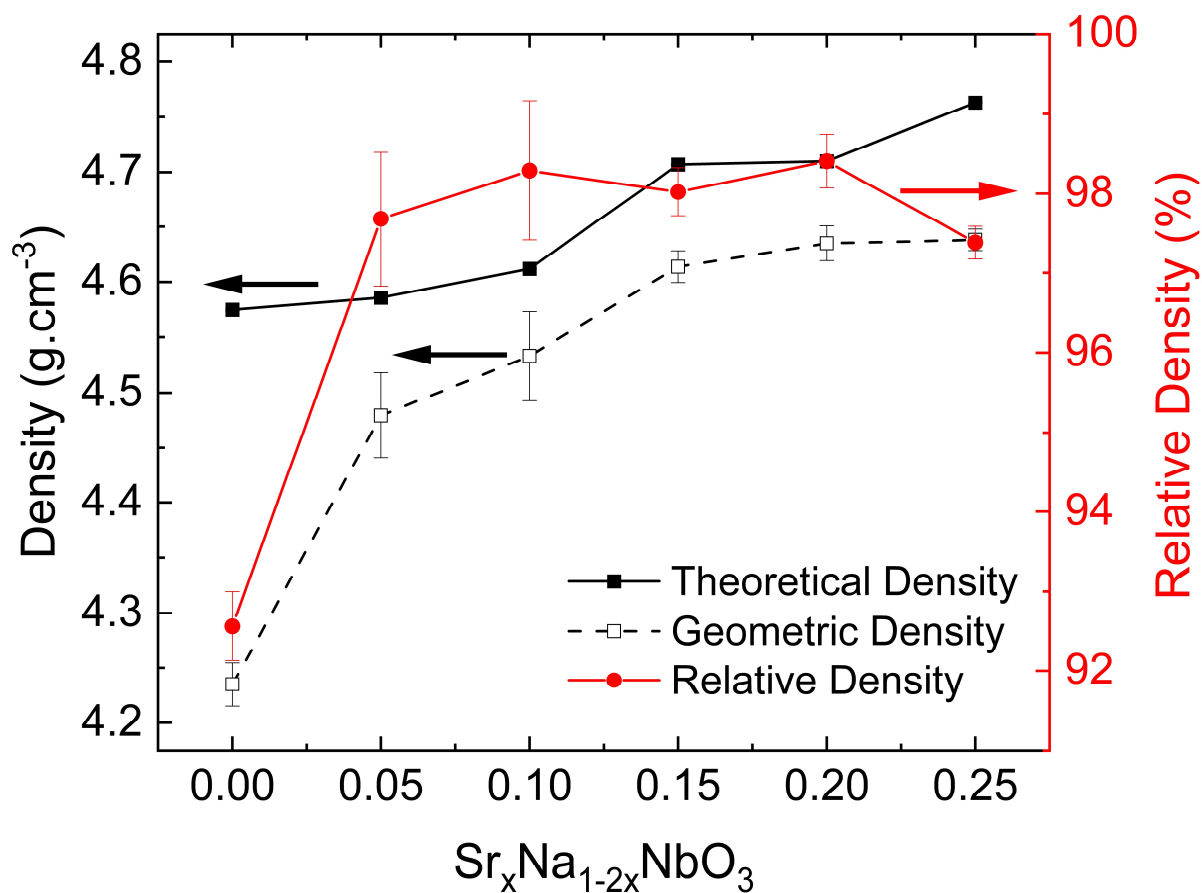

Figure S8: Geometric density, theoretical density calculated using lattice parameters from XRD refinements, and relative density against composition. Error bars correspond to standard error from the measurements of 5 samples.

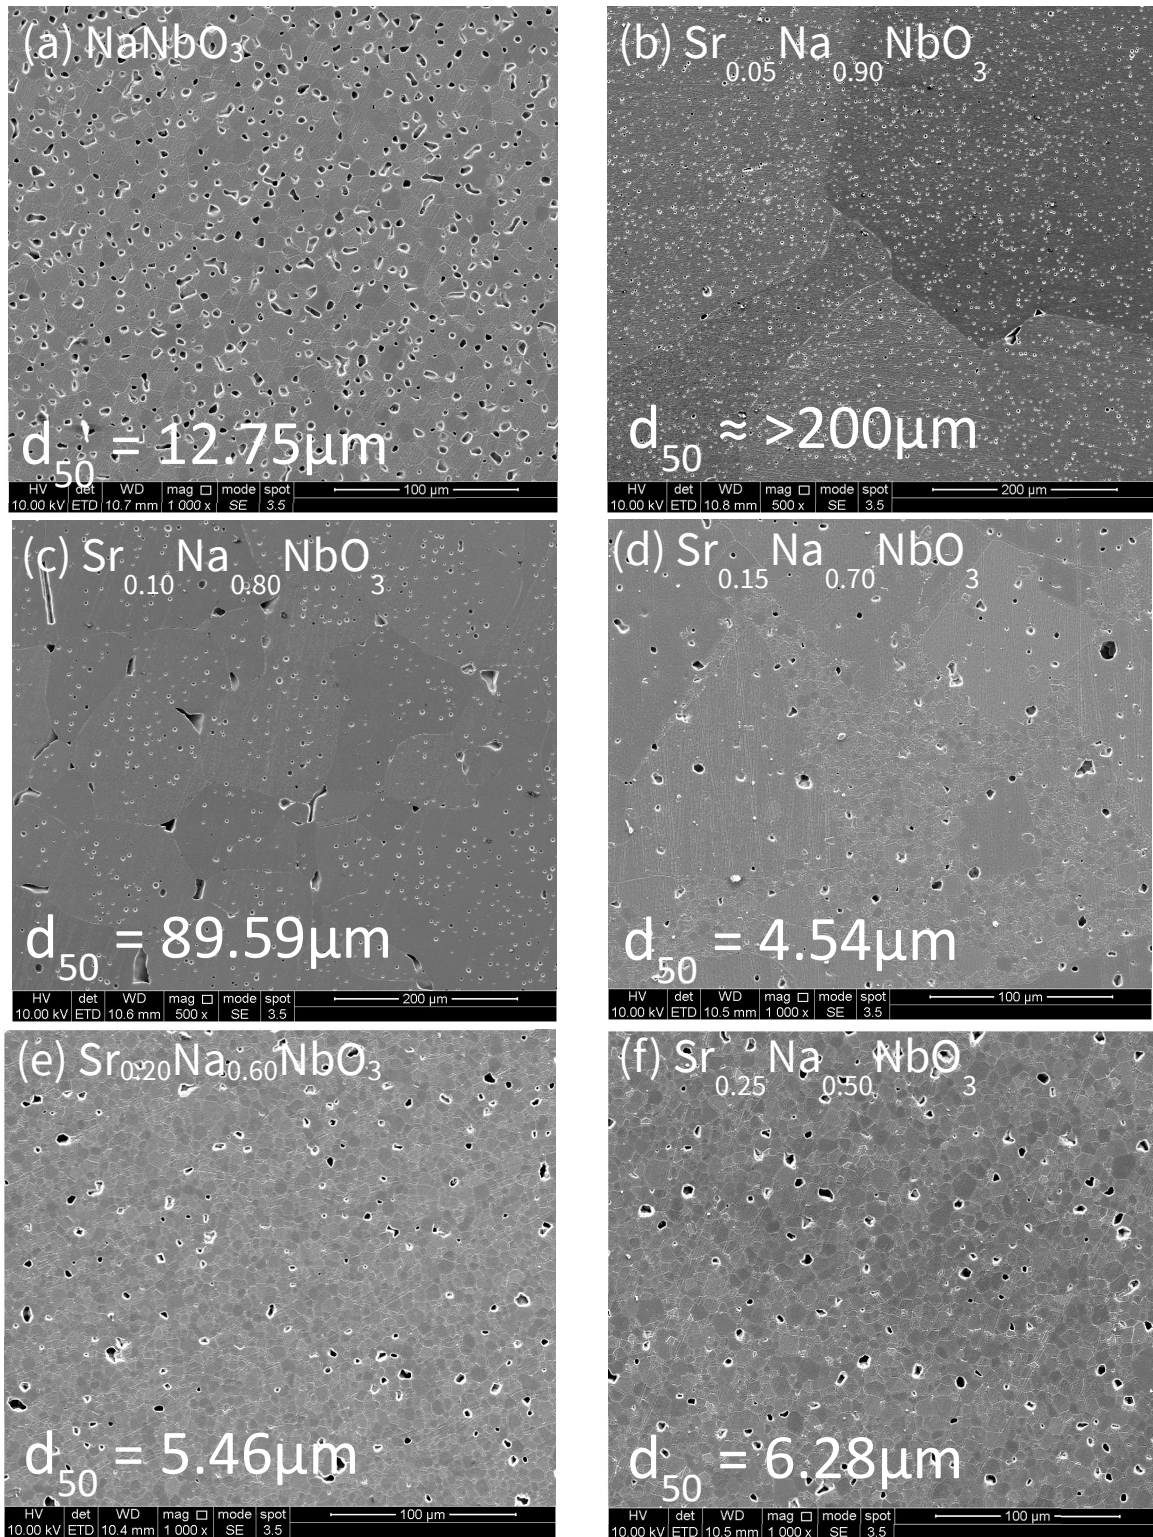

Figure S9: Secondary electron micrographs of polished and thermally etched samples for compositions (a)  $\text{NaNbO}_3$ , (b)  $\text{Sr}_{0.05}\text{Na}_{0.90}\text{NbO}_3$ , (c)  $\text{Sr}_{0.10}\text{Na}_{0.80}\text{NbO}_3$ , (d)  $\text{Sr}_{0.15}\text{Na}_{0.70}\text{NbO}_3$ , (e)  $\text{Sr}_{0.20}\text{Na}_{0.60}\text{NbO}_3$ , and (f)  $\text{Sr}_{0.25}\text{Na}_{0.50}\text{NbO}_3$ . Particle size determined by measuring 200 individual particles across 3 secondary electron micrographs using ImageJ software.

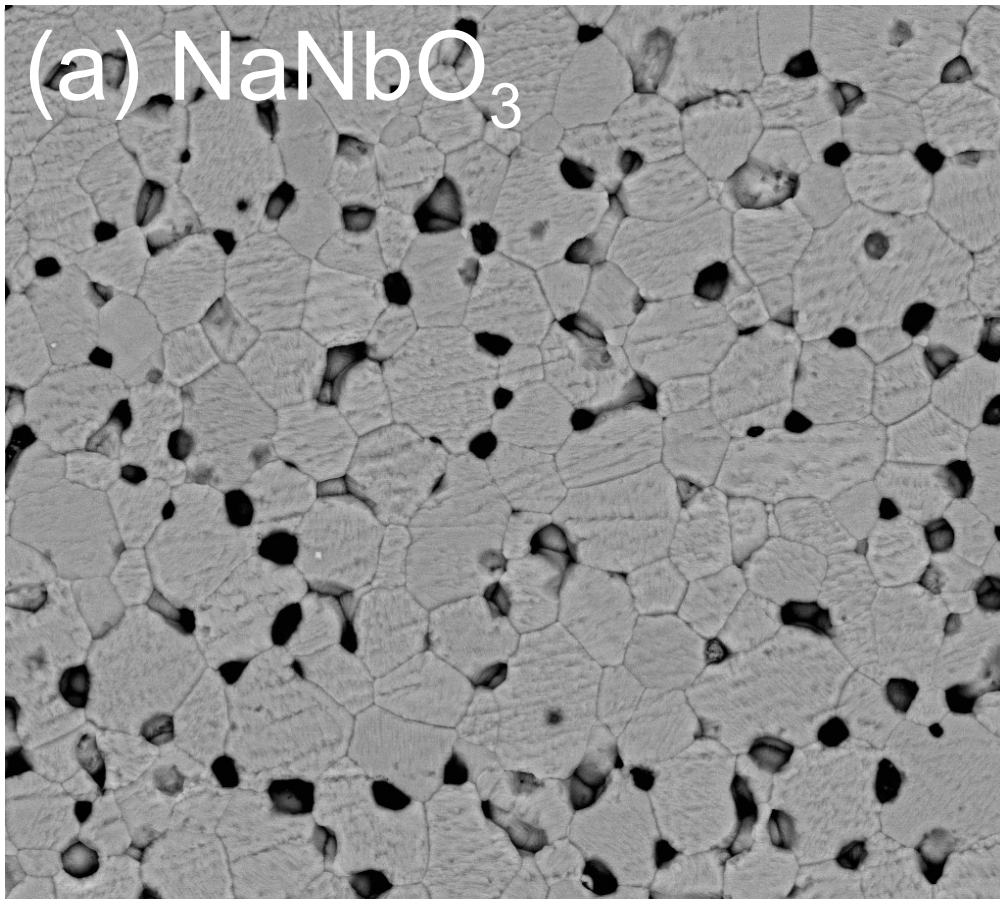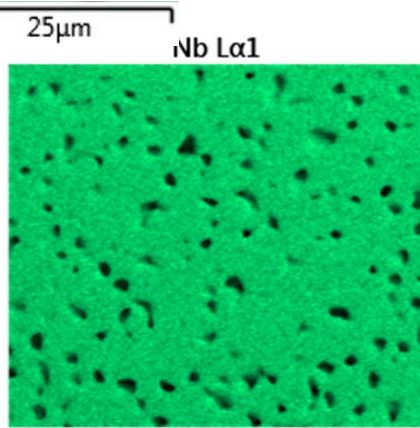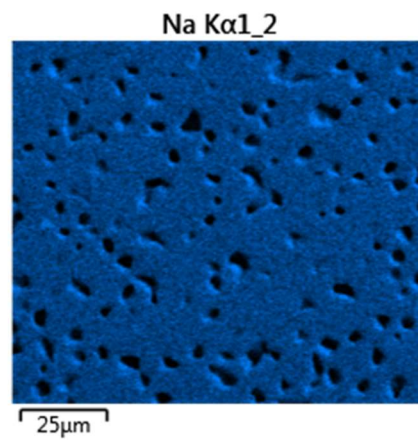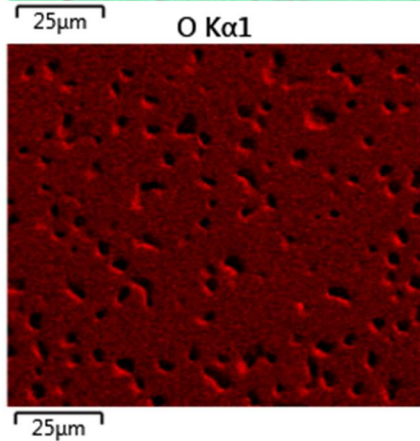



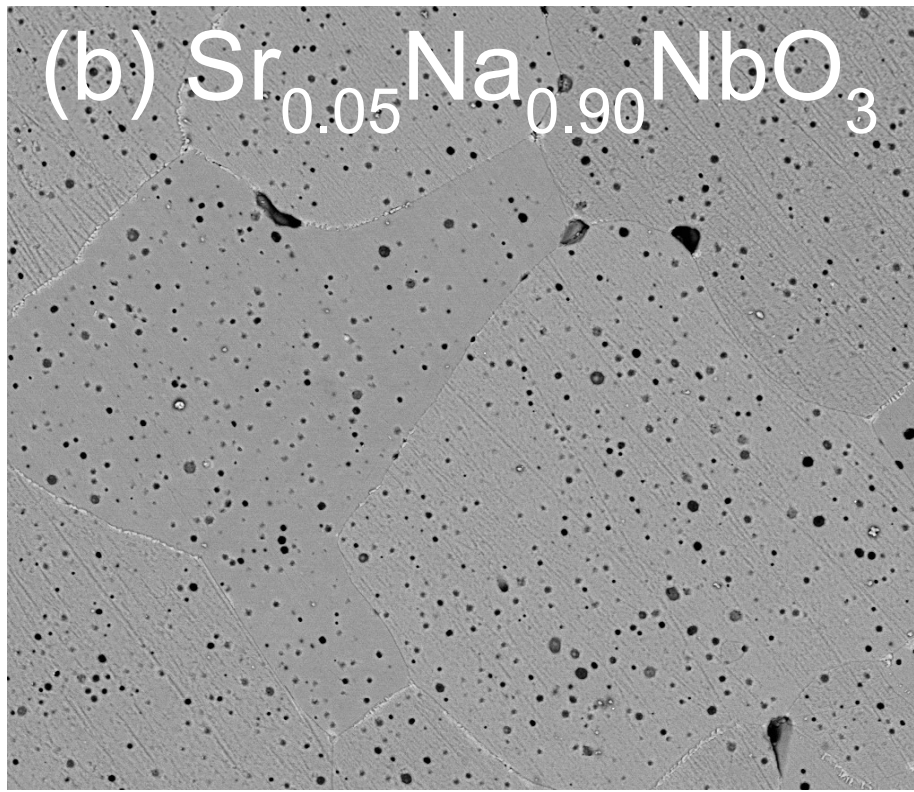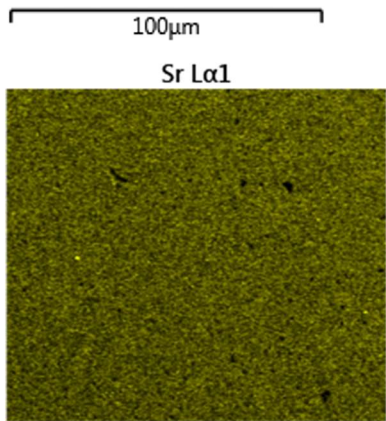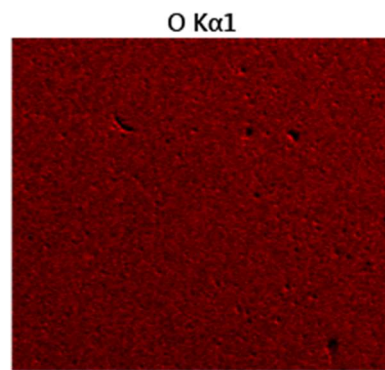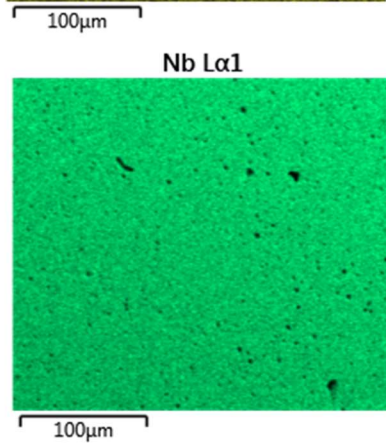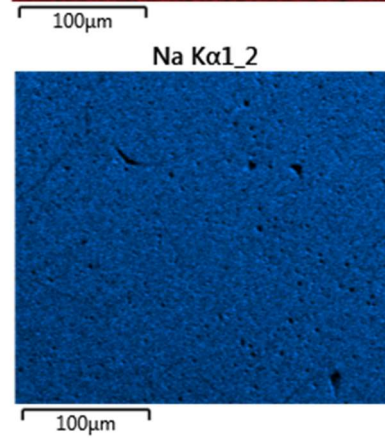

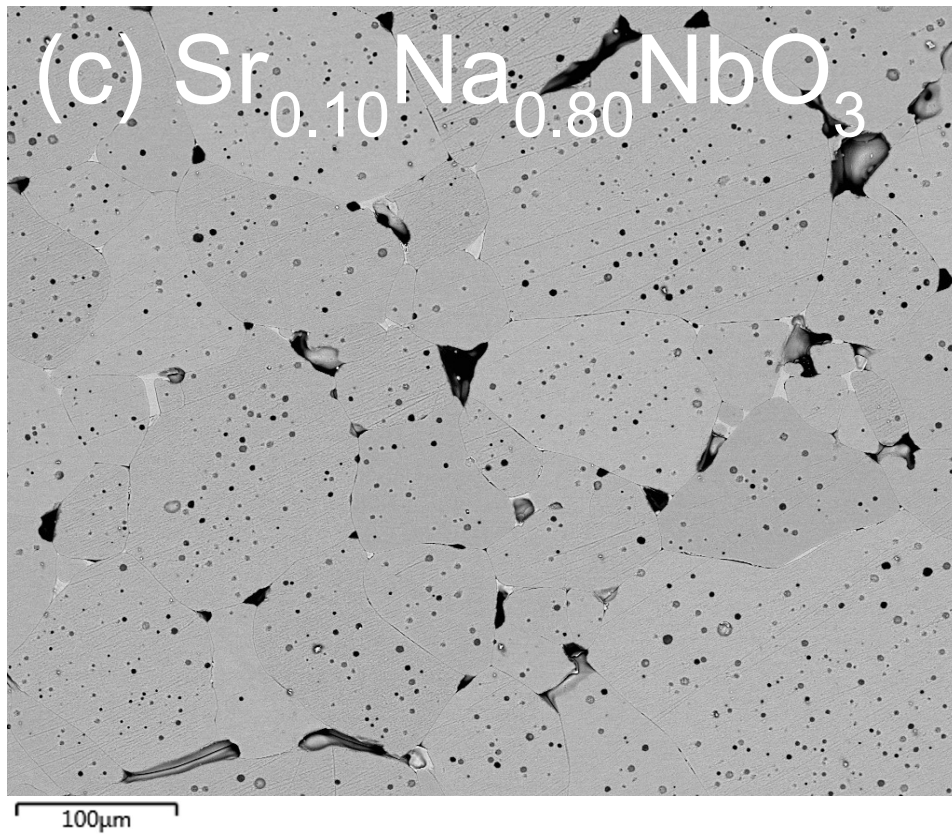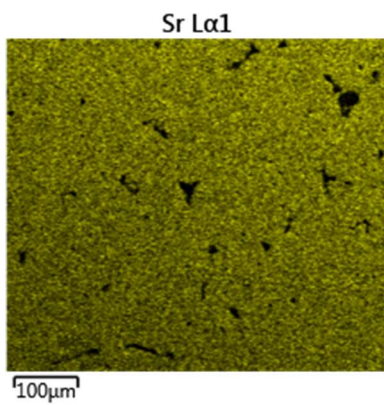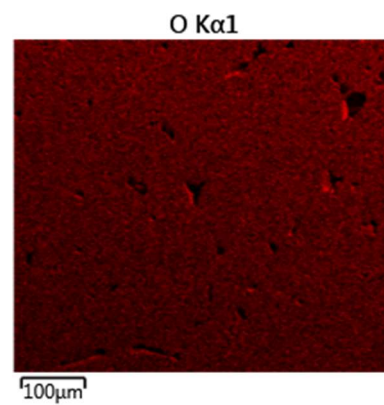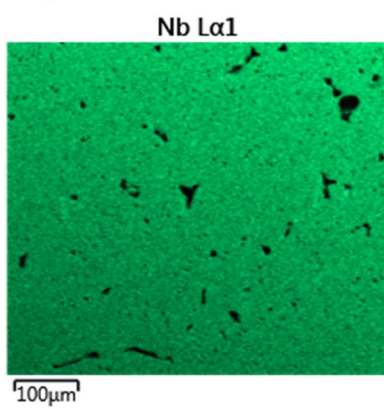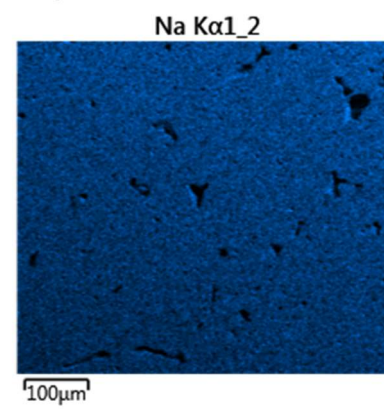



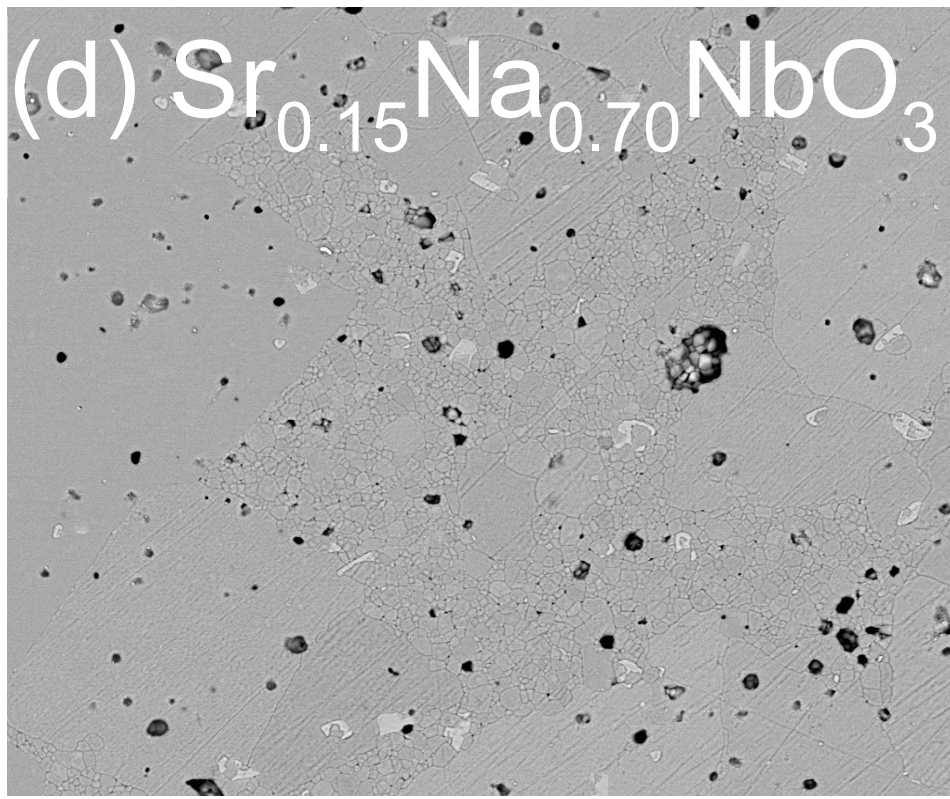

100 $\mu\text{m}$

Sr L $\alpha$ 1

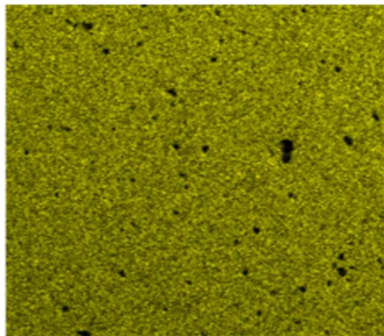

100 $\mu\text{m}$

O K $\alpha$ 1

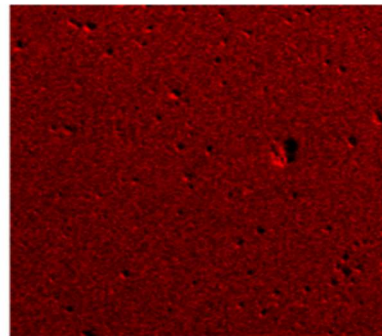

100 $\mu\text{m}$

Nb L $\alpha$ 1

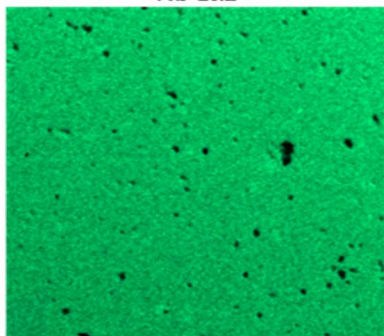

100 $\mu\text{m}$

Na K $\alpha$ 1\_2

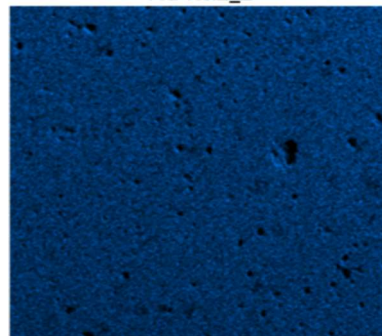

100 $\mu\text{m}$

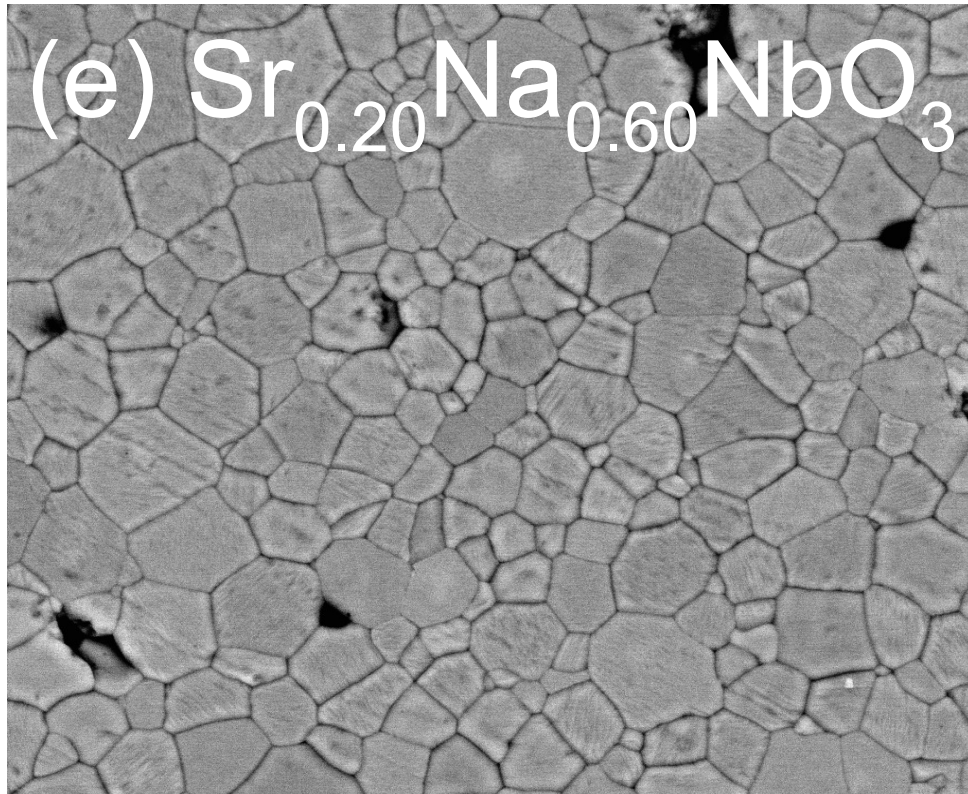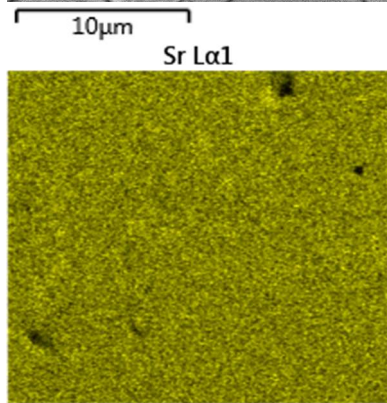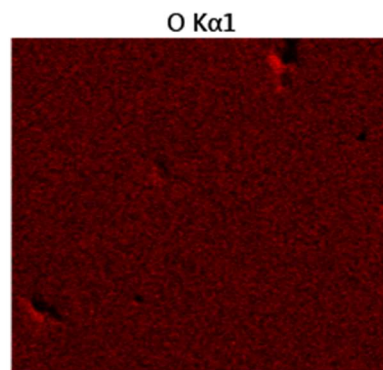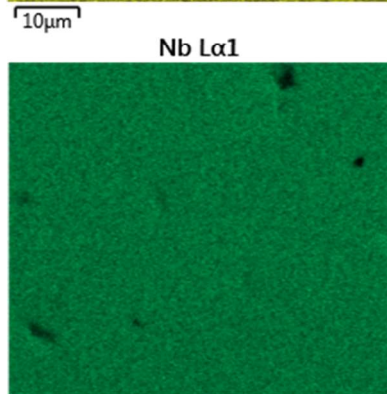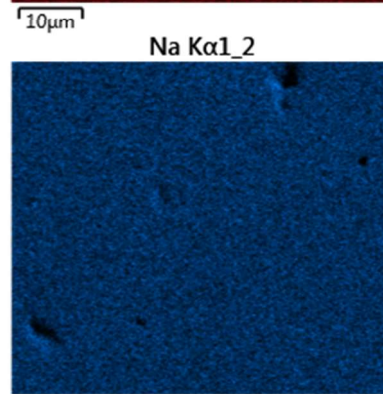



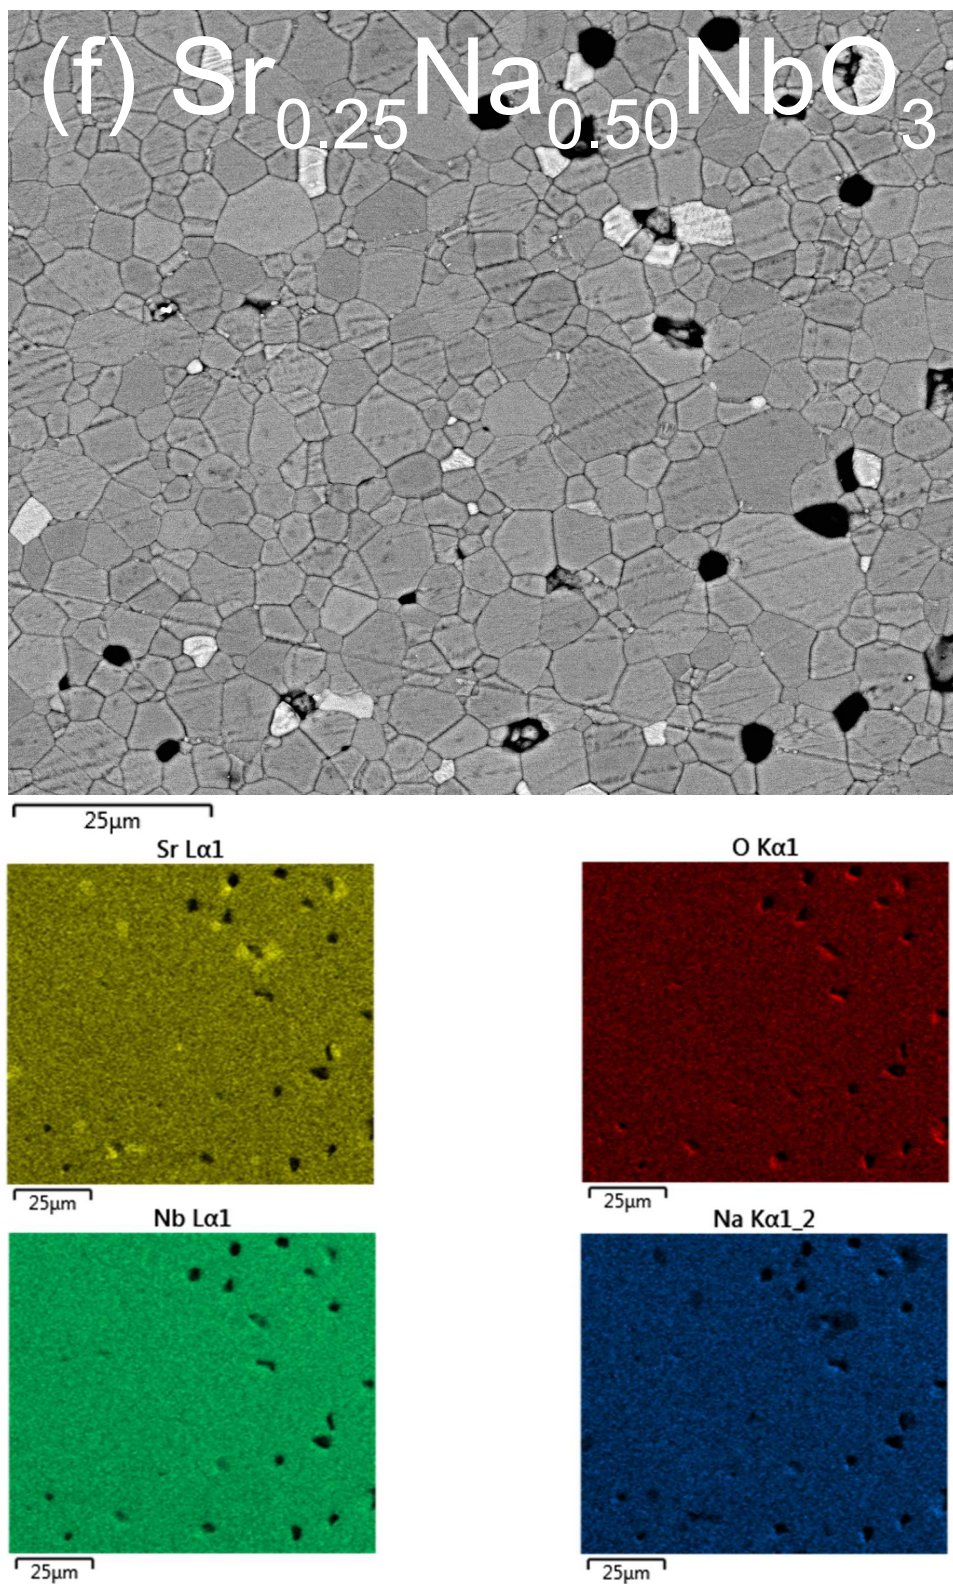

Figure S10: Backscatter electron micrographs and corresponding EDX maps of polished and thermally etched samples of (a)  $\text{NaNbO}_3$ , (b)  $\text{Sr}_{0.05}\text{Na}_{0.90}\text{NbO}_3$ , (c)  $\text{Sr}_{0.10}\text{Na}_{0.80}\text{NbO}_3$ , (d)  $\text{Sr}_{0.15}\text{Na}_{0.70}\text{NbO}_3$ , (e)  $\text{Sr}_{0.20}\text{Na}_{0.60}\text{NbO}_3$ , and (f)  $\text{Sr}_{0.25}\text{Na}_{0.50}\text{NbO}_3$ . Bright regions in (c) and (d) can be identified as  $\text{NaNb}_3\text{O}_8$  and in (f) as tetragonal tungsten bronze  $\text{Sr}_2\text{NaNb}_5\text{O}_{15}$

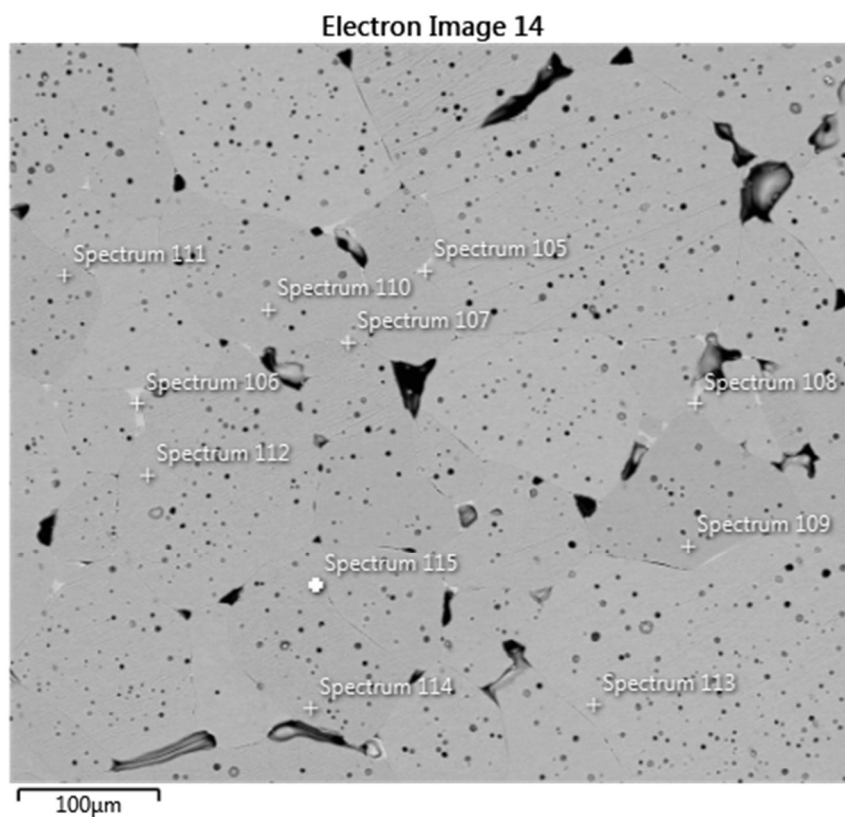

Figure S11: Backscattered electron micrograph of polished and thermally etched  $\text{Sr}_{0.10}\text{Na}_{0.80}\text{NbO}_3$  bulk ceramic, annotated with point spectra positions.

Table S1: Spectrum number according to Figure S11, and corresponding atomic percentage of ions. Highlighted cells correspond to regions of bright contrast.

| Spectrum | O (at%) | Na (at%) | Sr (at%) | Nb (at%) |
|----------|---------|----------|----------|----------|
| 105      | 63.22   | 8.74     | 0.3      | 27.73    |
| 106      | 61.53   | 9.08     | 0.47     | 28.93    |
| 107      | 62.8    | 9.87     | 0.5      | 26.82    |
| 108      | 62.43   | 9.01     | 0.18     | 28.39    |
| 109      | 57.29   | 16.14    | 2.18     | 24.4     |
| 110      | 57.53   | 16.59    | 2.1      | 23.78    |
| 111      | 58.05   | 15.83    | 2.11     | 24.02    |
| 112      | 57.17   | 16.67    | 2.13     | 24.03    |
| 113      | 57.7    | 16.23    | 2.15     | 23.92    |
| 114      | 58.74   | 16.23    | 2.06     | 22.96    |
| 115      | 57.52   | 15.8     | 2.1      | 24.58    |

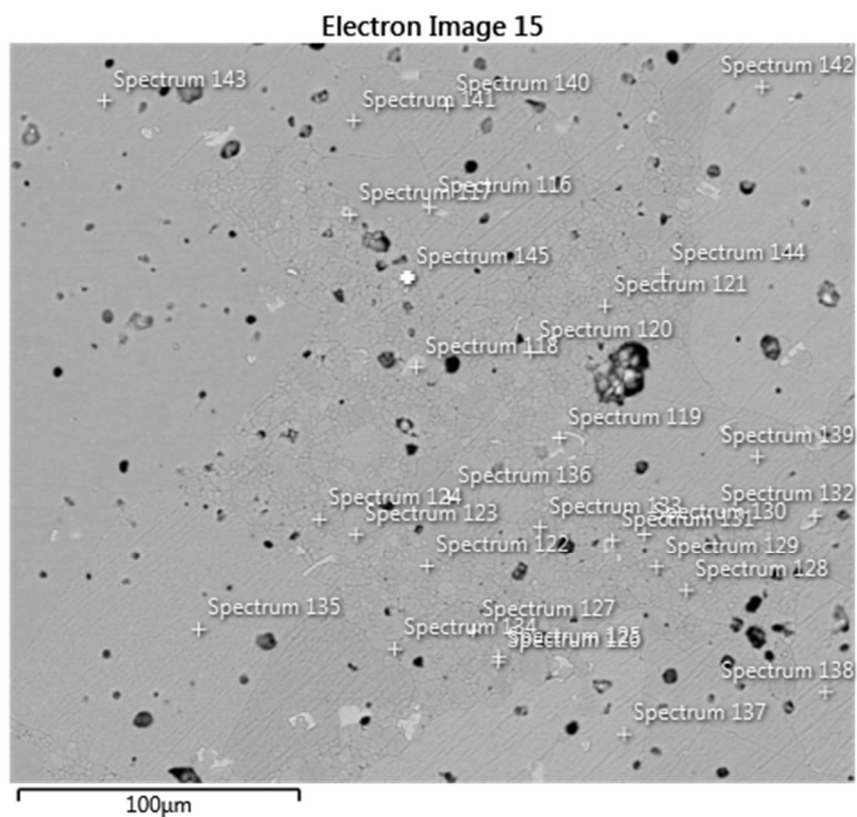

Figure S12: Backscattered electron micrograph of polished and thermally etched  $\text{Sr}_{0.15}\text{Na}_{0.70}\text{NbO}_3$  bulk ceramic, annotated with point spectra positions.

Table S2: Spectrum number according to Figure S12, and corresponding atomic percentage of ions. Highlighted cells correspond to regions of bright contrast.

| Spectrum | O     | Na    | Sr   | Nb    |
|----------|-------|-------|------|-------|
| 116      | 63.49 | 7.29  | 1.89 | 27.33 |
| 117      | 63.3  | 7.59  | 1.8  | 27.32 |
| 118      | 62.33 | 7.51  | 1.83 | 28.34 |
| 119      | 63.21 | 7.46  | 1.79 | 27.55 |
| 120      | 58.67 | 14.3  | 3.25 | 23.79 |
| 121      | 58.56 | 14.28 | 3.18 | 23.98 |
| 122      | 58.56 | 14.25 | 3.24 | 24.01 |
| 123      | 57.84 | 14.53 | 3.07 | 24.56 |

|     |       |       |      |       |
|-----|-------|-------|------|-------|
| 124 | 57.29 | 14.53 | 3.41 | 24.78 |
| 125 | 59.72 | 14.55 | 2.91 | 22.82 |
| 126 | 58.28 | 14.07 | 3.38 | 24.27 |
| 127 | 57.96 | 14.33 | 3.21 | 24.51 |
| 128 | 58.14 | 14.85 | 3    | 24.01 |
| 129 | 58.17 | 14.1  | 3.29 | 24.44 |
| 130 | 58.36 | 14.3  | 3.19 | 24.15 |
| 131 | 64.44 | 8.15  | 1.83 | 25.58 |
| 132 | 61.88 | 7.43  | 1.97 | 28.72 |
| 133 | 59.27 | 13.94 | 3.19 | 23.59 |
| 134 | 58.47 | 13.93 | 3.32 | 24.28 |
| 135 | 58.88 | 13.63 | 3.47 | 24.03 |
| 136 | 58.27 | 14.13 | 3.28 | 24.32 |
| 137 | 59.66 | 14.01 | 3.14 | 23.19 |
| 138 | 57.49 | 14.33 | 3.21 | 24.97 |

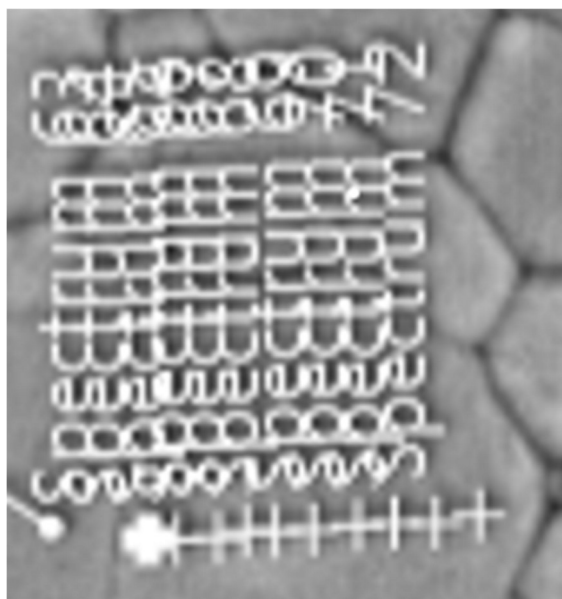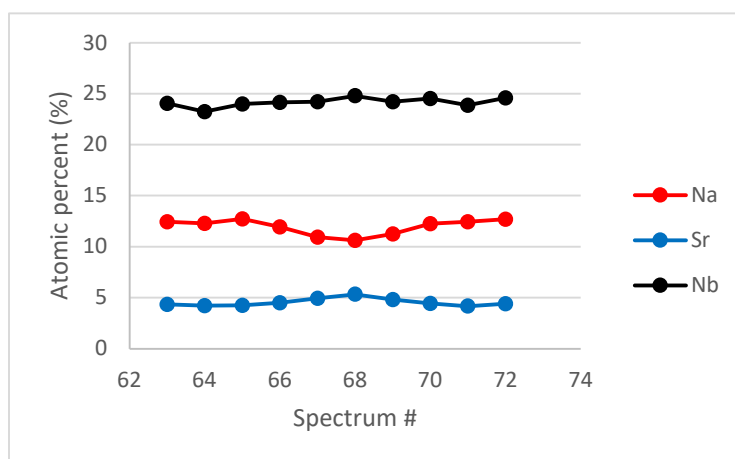

Figure S13: Point spectra across a grain in polished and thermally etched  $\text{Sr}_{0.20}\text{Na}_{0.60}\text{NbO}_3$  and corresponding atomic percentage to demonstrate core-shell microstructure.



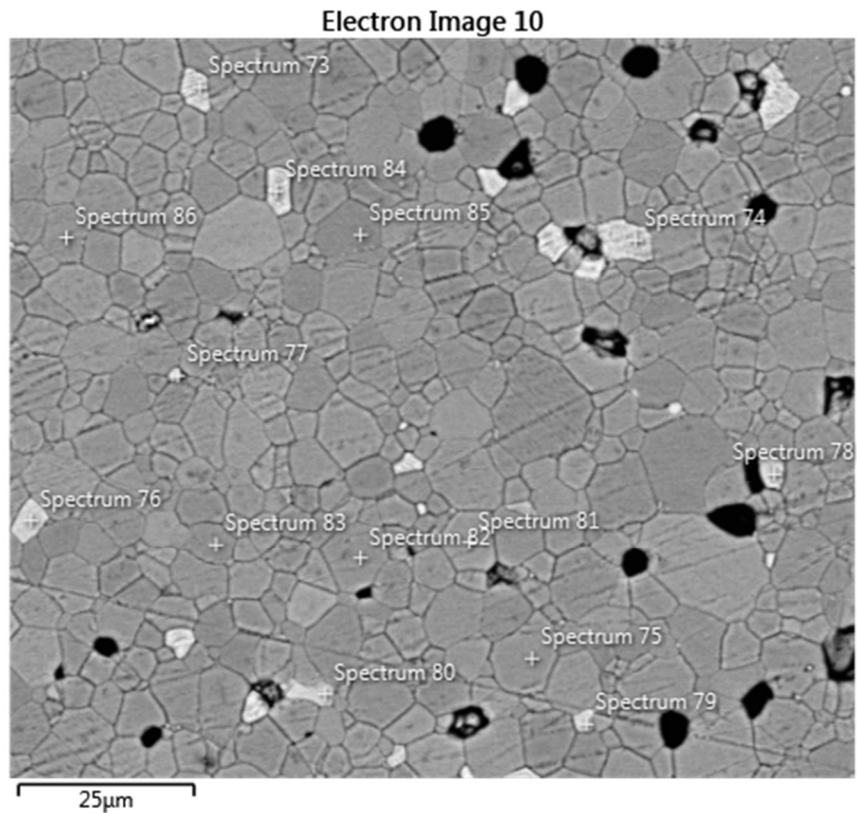

Figure S14: Backscattered electron micrograph of polished and thermally etched  $\text{Sr}_{0.25}\text{Na}_{0.50}\text{NbO}_3$  bulk ceramic, annotated with point spectra positions.

Table S3: Spectrum number according to Figure S14, and corresponding atomic percentage of ions. Highlighted cells correspond to regions of bright contrast.

| Spectrum | O (at%) | Na (at%) | Sr (at%) | Nb (at%) |
|----------|---------|----------|----------|----------|
| 73       | 61.25   | 4.95     | 8.09     | 25.71    |
| 74       | 63.05   | 4.28     | 8.36     | 24.32    |
| 75       | 58.45   | 10.41    | 5.67     | 25.48    |
| 76       | 60.43   | 4.13     | 9.02     | 26.42    |
| 77       | 44.97   | 9.85     | 7.68     | 37.5     |
| 78       | 59.76   | 4.55     | 8.88     | 26.82    |
| 79       | 61.37   | 5.25     | 8.03     | 25.35    |

|    |       |       |      |       |
|----|-------|-------|------|-------|
| 80 | 60.47 | 5.34  | 7.96 | 26.23 |
| 81 | 59.34 | 10.31 | 5.58 | 24.77 |
| 82 | 58.85 | 10.56 | 5.64 | 24.95 |
| 83 | 58.84 | 10.35 | 5.59 | 25.22 |
| 84 | 60.53 | 4.29  | 9.14 | 26.05 |
| 85 | 58.28 | 10.69 | 5.7  | 25.33 |
| 86 | 59.3  | 10.38 | 5.63 | 24.69 |

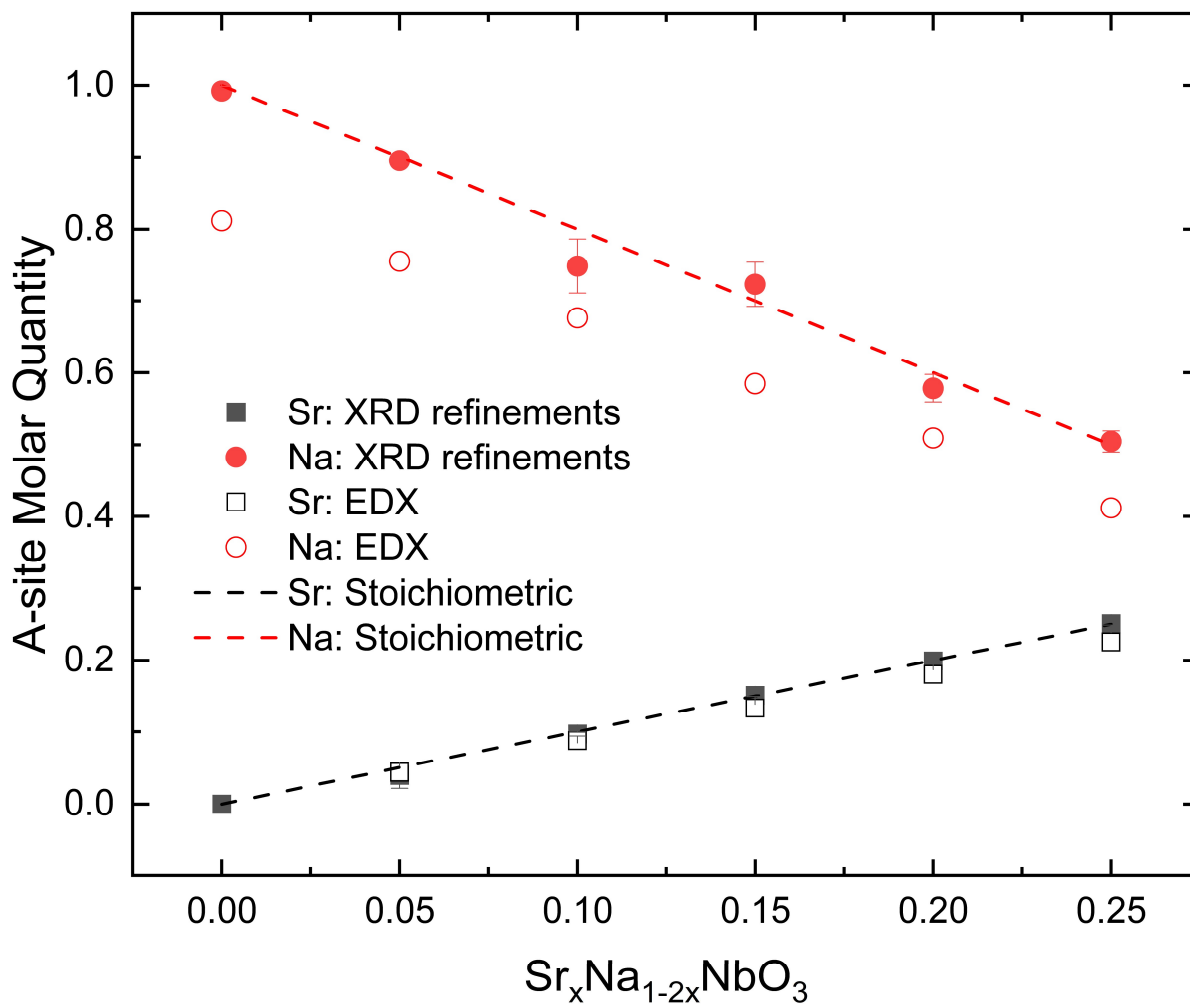

Figure S15:  $Sr^{2+}$  and  $Na^+$  occupancies extracted from Rietveld refinements (solid data points) and average at% calculated from EDX mapping (hollow data points) against composition. Dashed lines correspond to nominal  $Sr_xNa_{1-2x}NbO_3$



## SI Section S5: Dielectric Spectroscopy

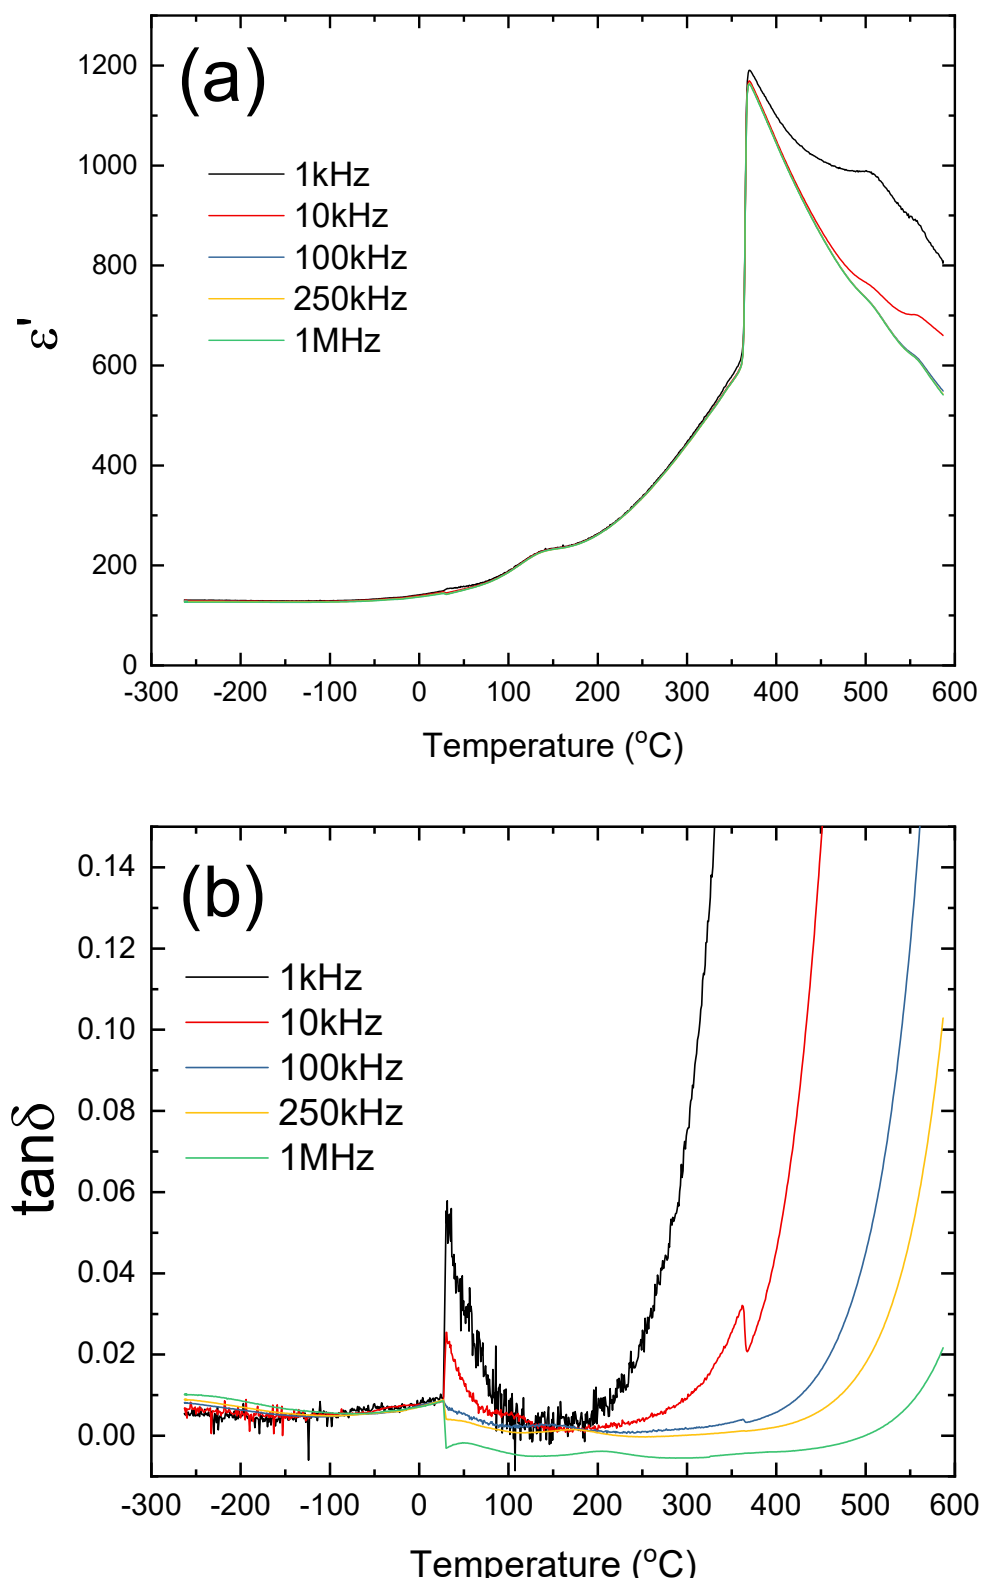

Figure S16: (a) Real component of permittivity ( $\epsilon'$ ) and (b)  $\tan \delta$  at fixed frequencies against temperature for  $\text{NaNbO}_3$  ( $x = 0.00$ ). Sub-zero  $\tan \delta$  are due to electrical noise (inductance) from electrical testing equipment.

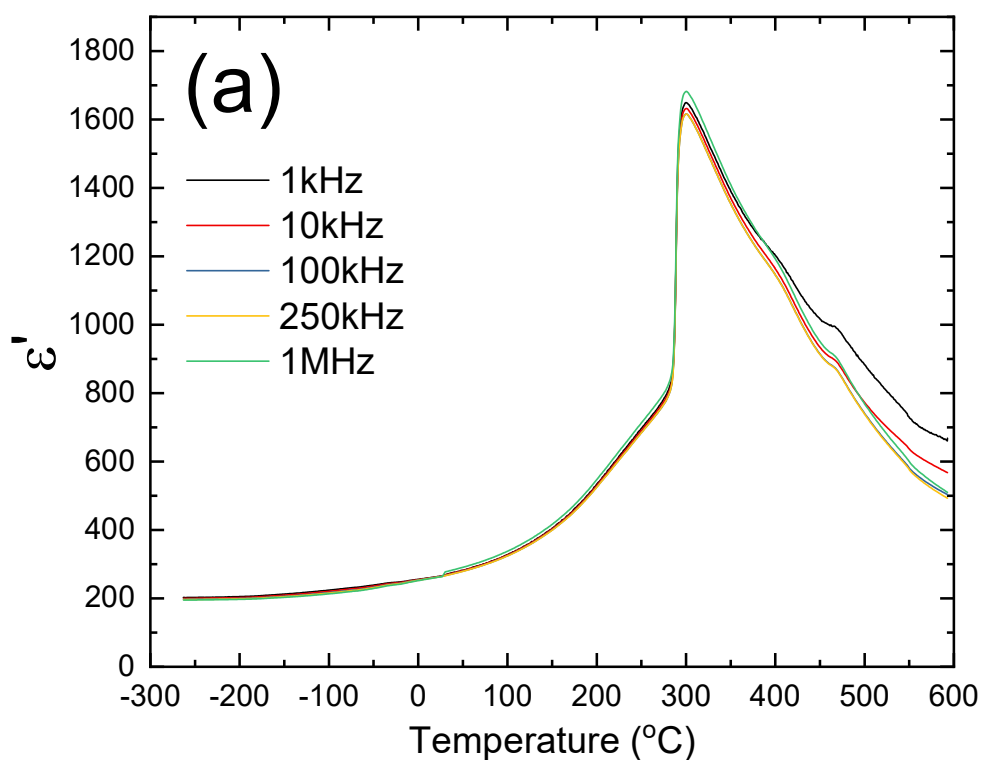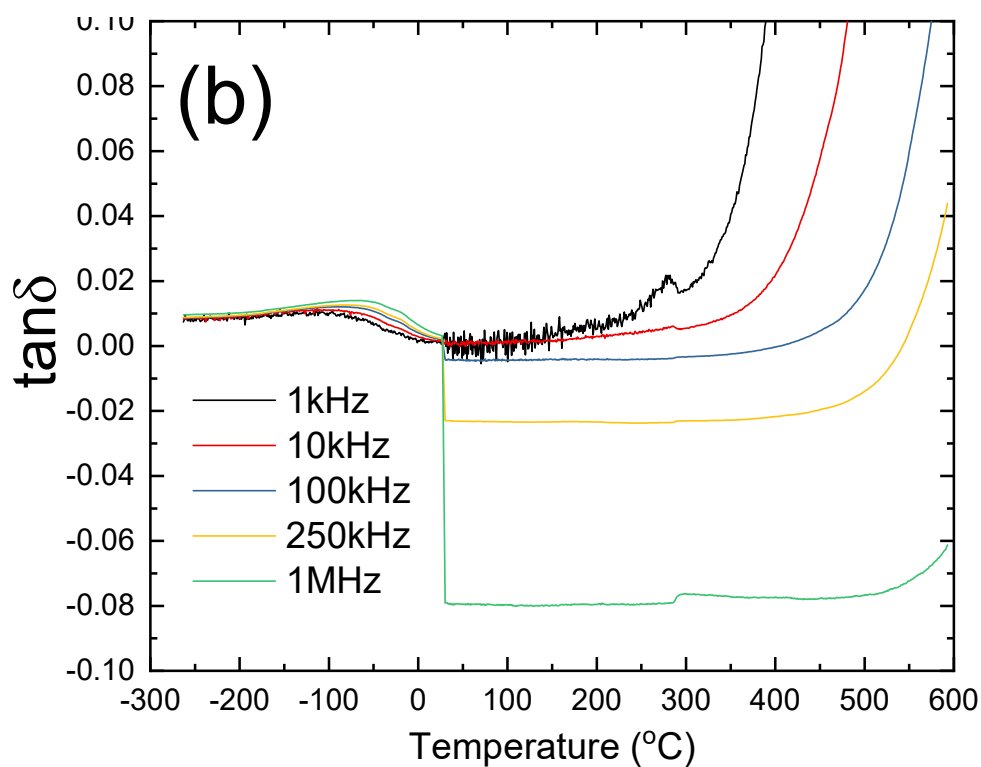

Figure S17: (a) Real component of permittivity ( $\epsilon'$ ) and (b)  $\tan \delta$  at fixed frequencies against temperature for  $\text{Sr}_{0.05}\text{Na}_{0.90}\text{NbO}_3$  ( $x = 0.05$ ). Sub-zero  $\tan \delta$  are due to electrical noise (inductance) from electrical testing equipment.

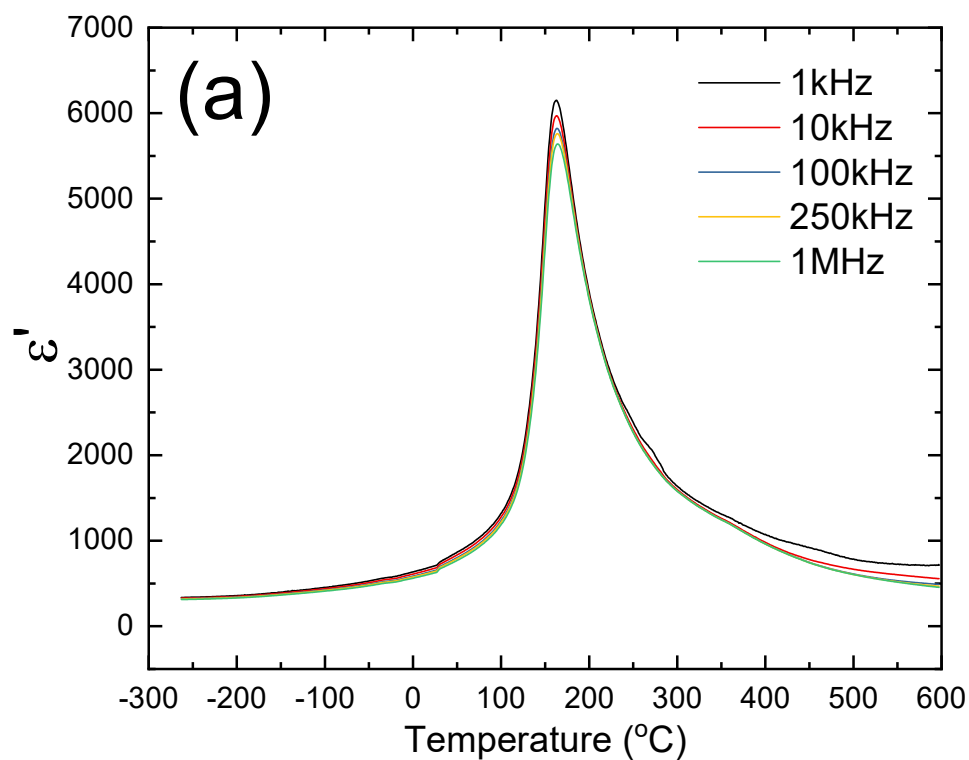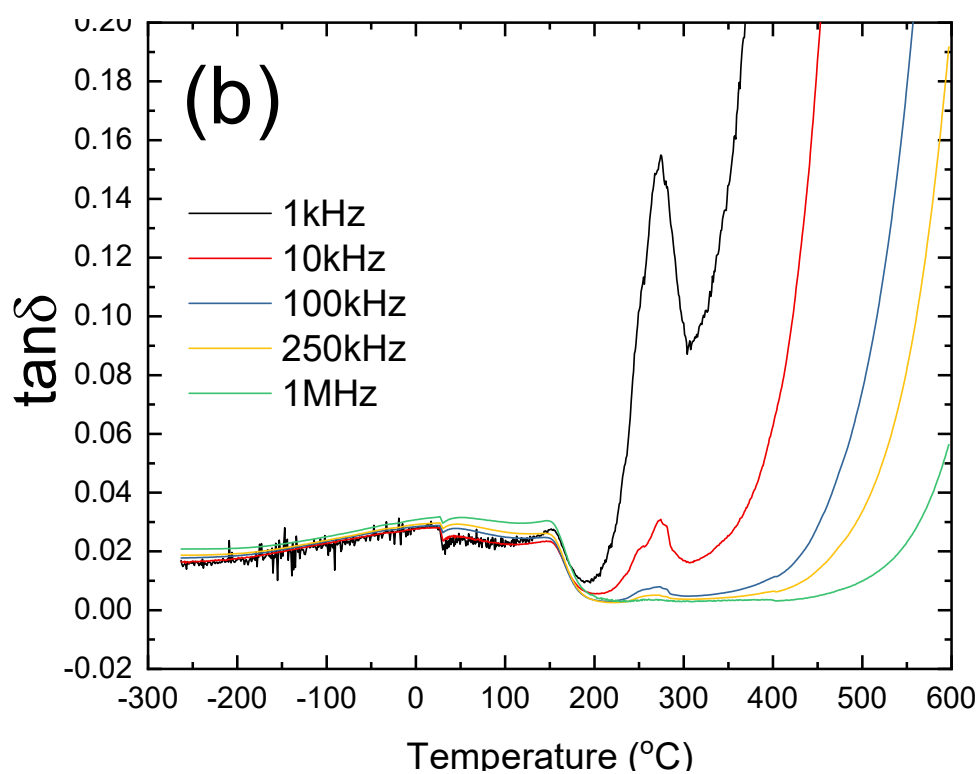

Figure S18: (a) Real component of permittivity ( $\epsilon'$ ) and (b)  $\tan \delta$  at fixed frequencies against temperature for  $\text{Sr}_{0.10}\text{Na}_{0.80}\text{NbO}_3$  ( $x = 0.10$ )

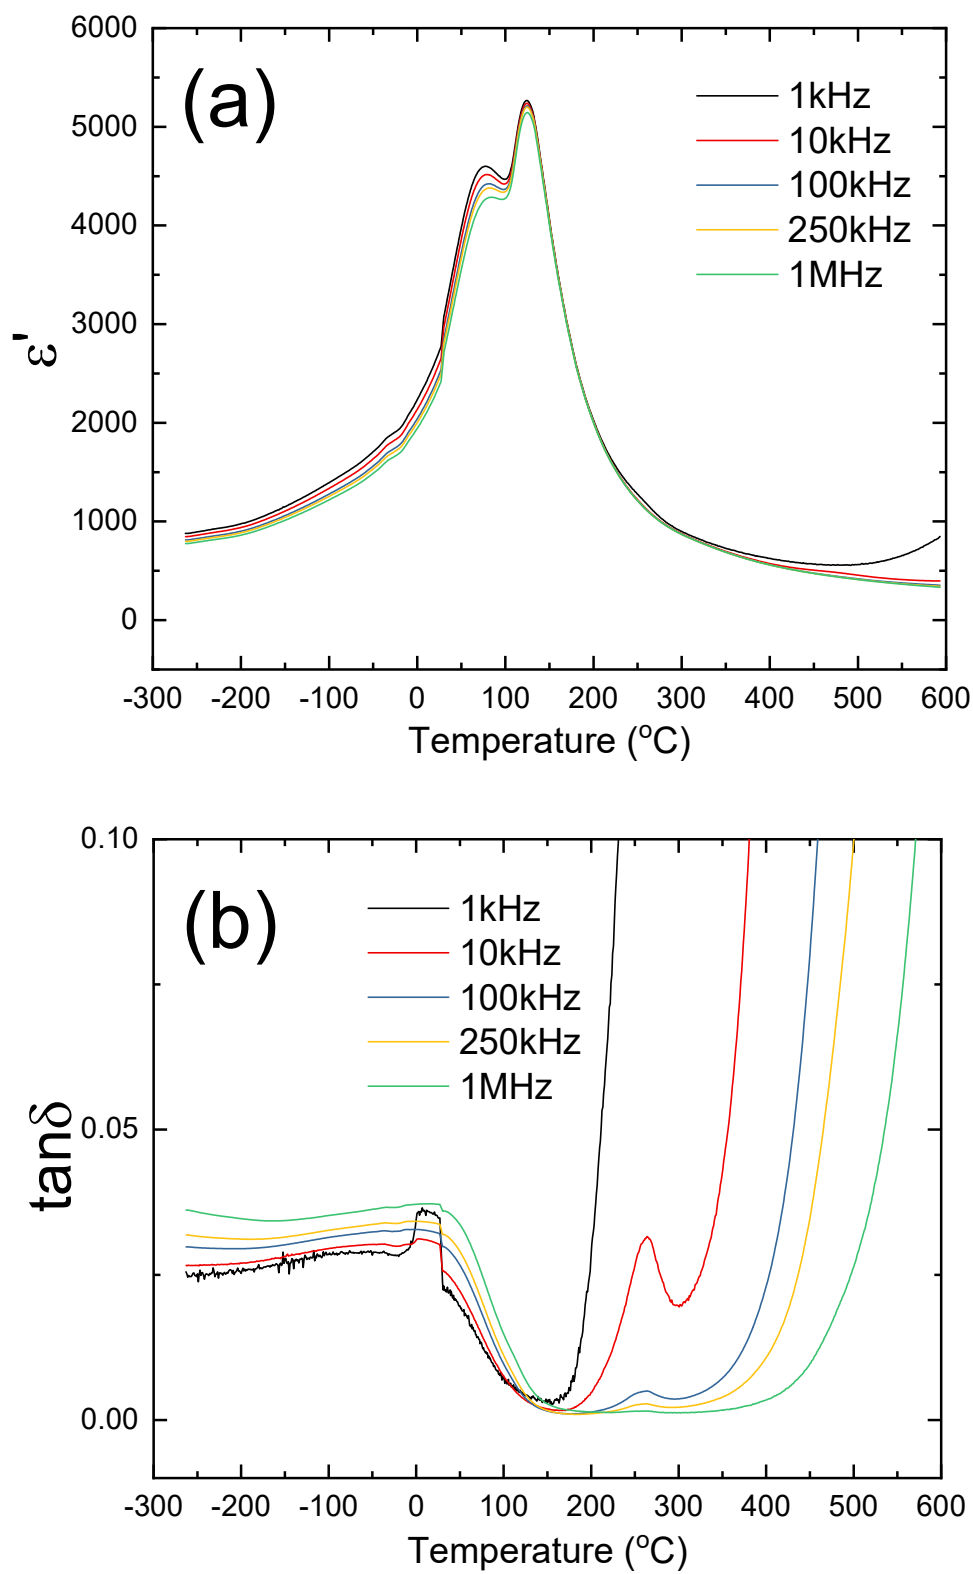

Figure S19: (a) Real component of permittivity ( $\epsilon'$ ) and (b)  $\tan \delta$  at fixed frequencies against temperature for  $\text{Sr}_{0.15}\text{Na}_{0.70}\text{NbO}_3$  ( $x = 0.15$ )

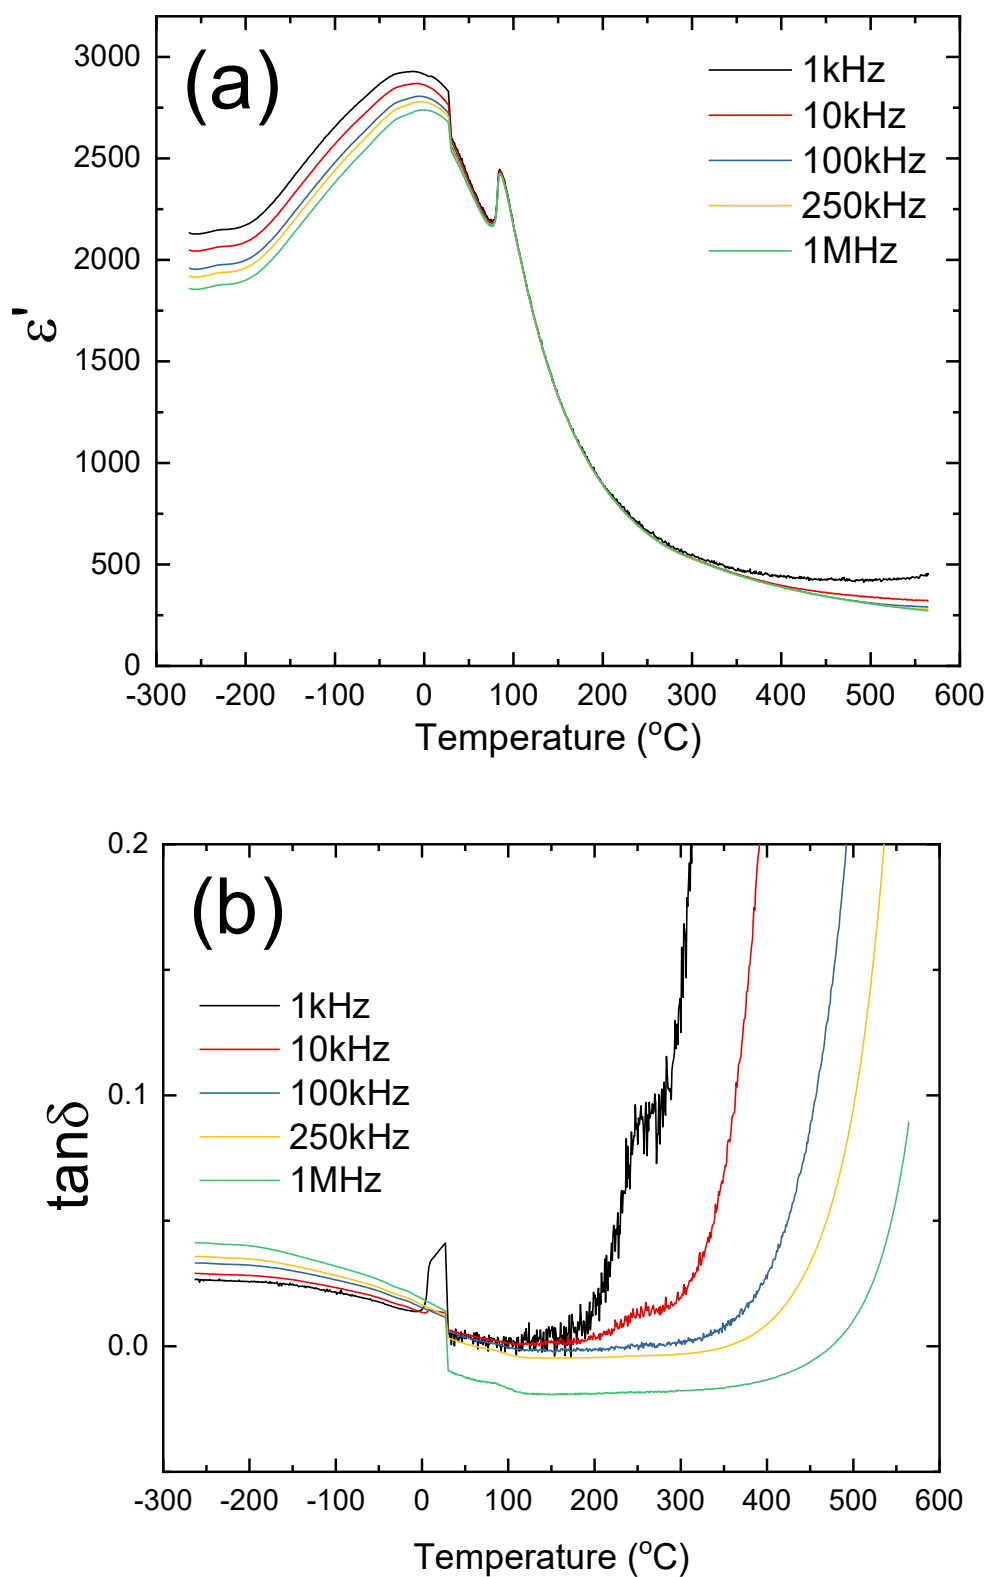

Figure S20: (a) Real component of permittivity ( $\epsilon'$ ) and (b)  $\tan \delta$  at fixed frequencies against temperature for  $\text{Sr}_{0.20}\text{Na}_{0.60}\text{NbO}_3$  ( $x = 0.20$ ). Sub-zero  $\tan \delta$  are due to electrical noise (inductance) from electrical testing equipment.

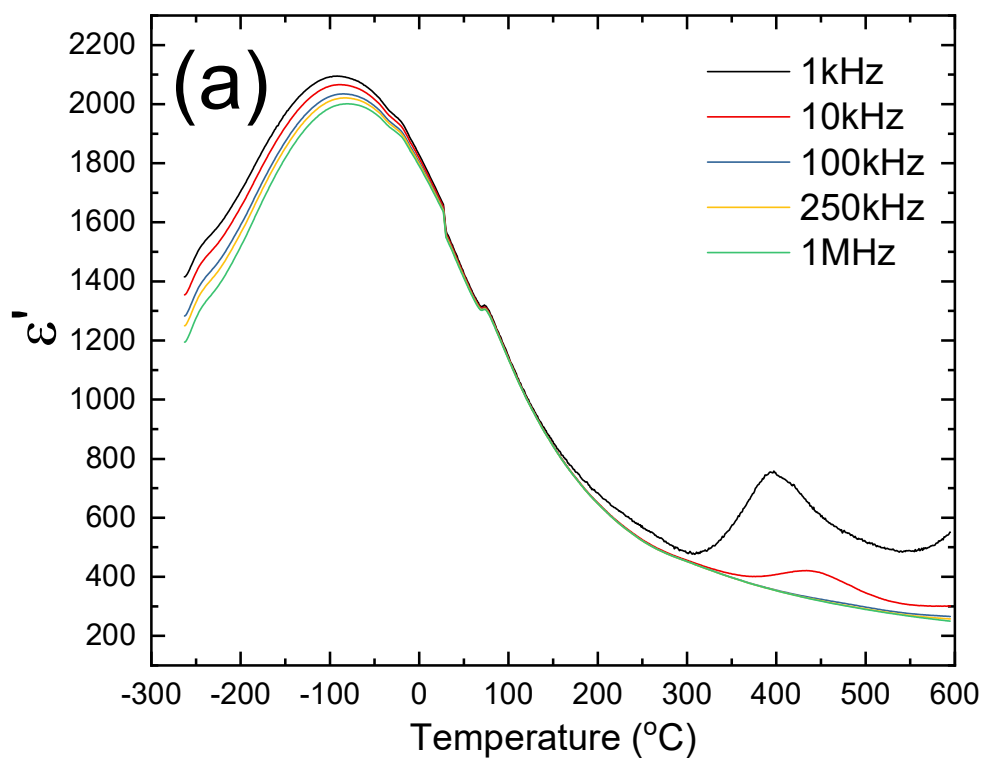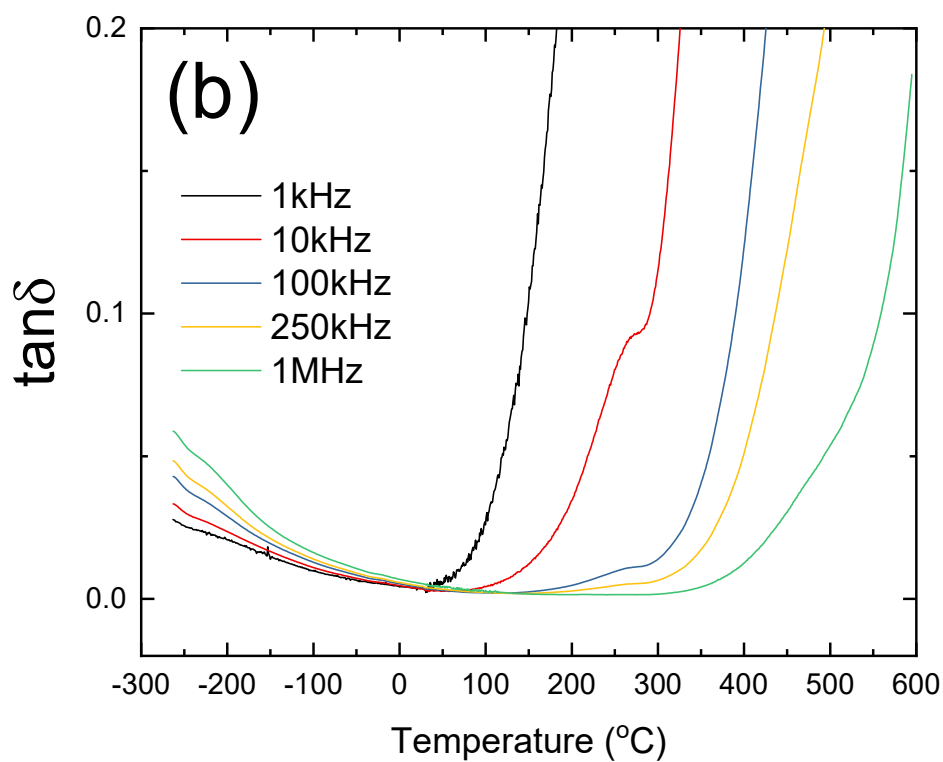

Figure S21: (a) Real component of permittivity ( $\epsilon'$ ) and (b)  $\tan \delta$  at fixed frequencies against temperature for  $\text{Sr}_{0.25}\text{Na}_{0.50}\text{NbO}_3$  ( $x = 0.25$ )

## **SI Section S6: Polarisation vs Electric Field analysis**

Table S4: Maximum polarisation ( $P_{\max}$ ), remnant polarisation ( $P_R$ ), coercive field ( $E_C$ ), recoverable energy density ( $W_{\text{rec}}$ ), energy loss density ( $W_{\text{loss}}$ ), thickness ( $S$ ) over electrode radius ( $r$ ), and efficiency ( $W_{\text{rec}}/W_{\text{rec}}+W_{\text{loss}}$ ) for  $\text{Sr}_x\text{Na}_{1-2x}\text{NbO}_3$  ( $x = 0.00, 0.05, 0.10, 0.15, 0.20, 0.25$ ) at  $40 \text{ kV.cm}^{-1}$

| $\text{Sr}_x\text{Na}_{1-2x}\text{NbO}_3$ | $P_{\max}$<br>( $\mu\text{C.cm}^{-2}$ ) | $P_R$<br>( $\mu\text{C.cm}^{-2}$ ) | $E_C$<br>( $\text{kV.cm}^{-1}$ ) | $W_{\text{rec}}$<br>( $\text{mJ.cm}^{-3}$ ) | $W_{\text{loss}}$<br>( $\text{mJ.cm}^{-3}$ ) | $S/r$ | $\eta$ (%) |
|-------------------------------------------|-----------------------------------------|------------------------------------|----------------------------------|---------------------------------------------|----------------------------------------------|-------|------------|
| 0                                         | 1.03                                    | 0.31                               | 9.94                             | 12.4                                        | 16.5                                         | 0.34  | 42.9       |
| 0.05                                      | 1.49                                    | 0.37                               | 9.90                             | 20.5                                        | 22.3                                         | 0.36  | 47.8       |
| 0.1                                       | 6.63                                    | 4.60                               | 17.58                            | 25.3                                        | 120.3                                        | 0.37  | 17.4       |
| 0.15                                      | 14.19                                   | 6.43                               | 8.01                             | 100.5                                       | 162.9                                        | 0.35  | 38.2       |
| 0.20                                      | 9.63                                    | 0.30                               | 1.60                             | 173.4                                       | 20.9                                         | 0.45  | 89.2       |
| 0.25                                      | 6.57                                    | 2.04                               | 11.85                            | 71.4                                        | 96.7                                         | 0.42  | 42.5       |

## SI Section S7: Impedance Spectroscopy and Arrhenius plots

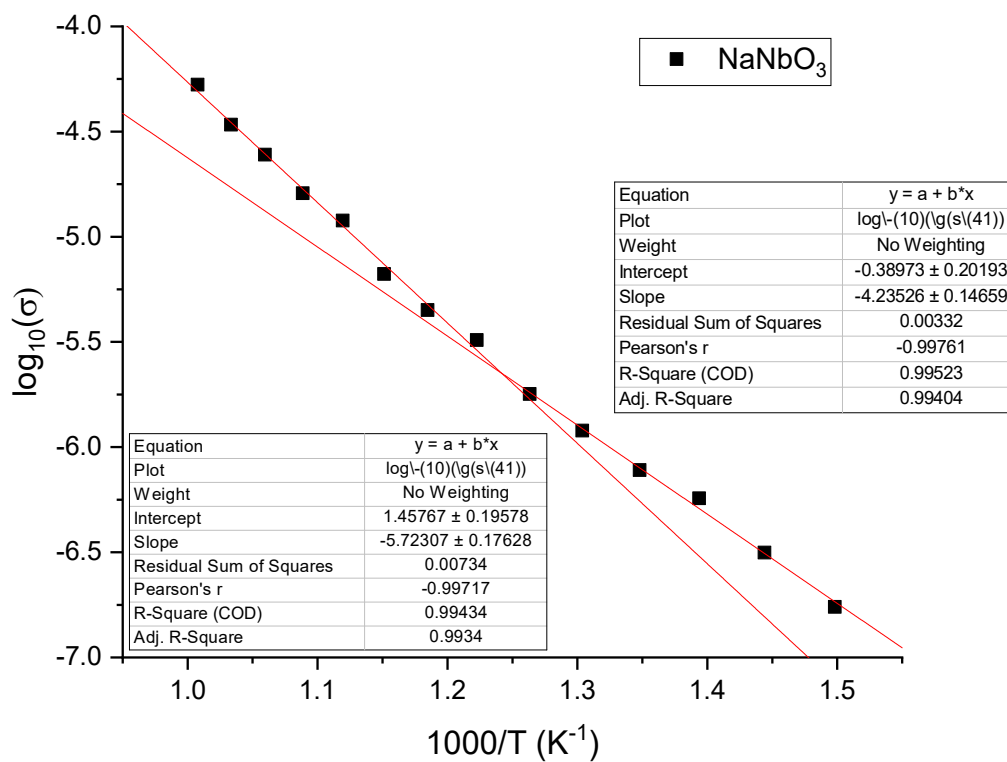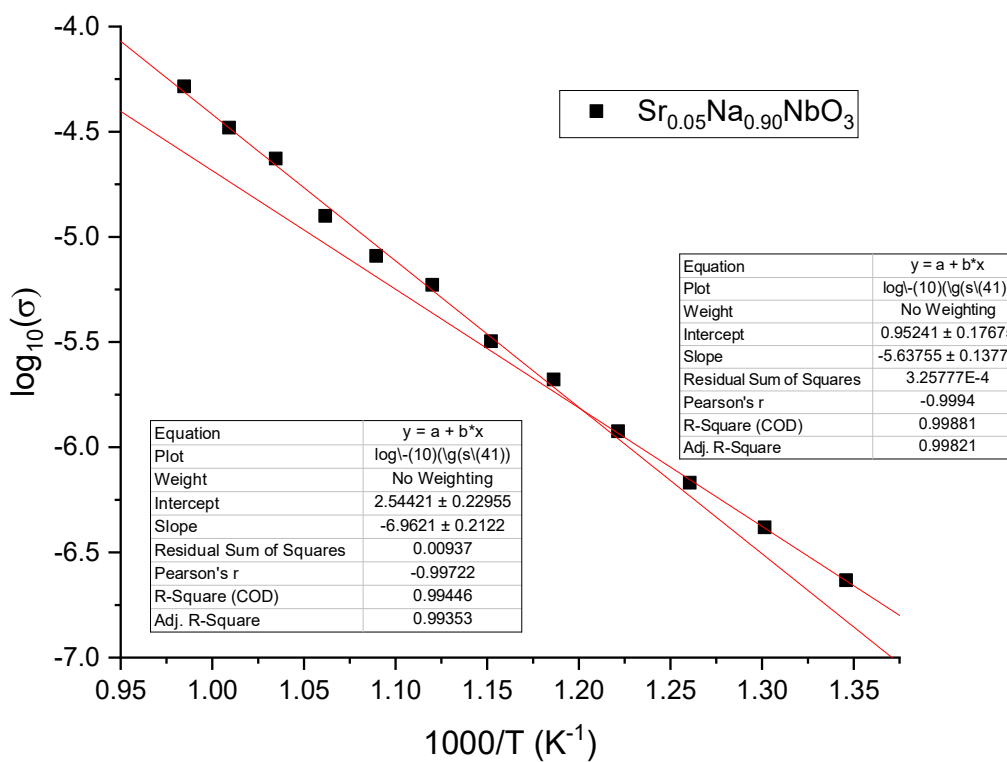



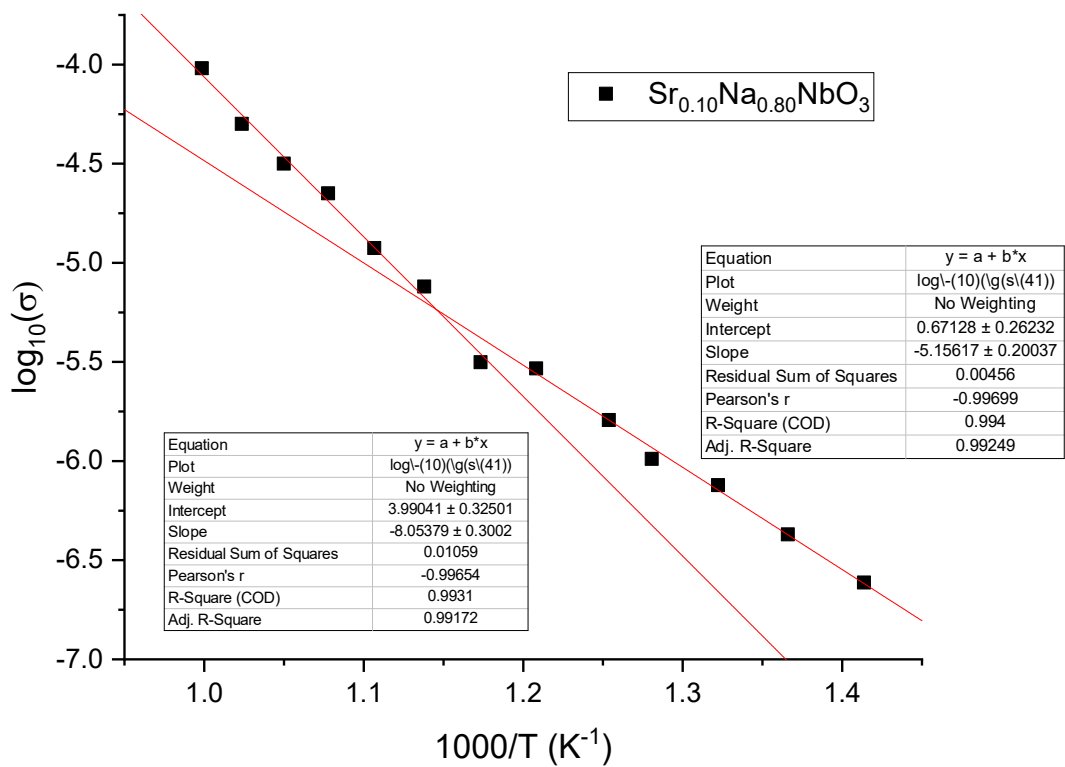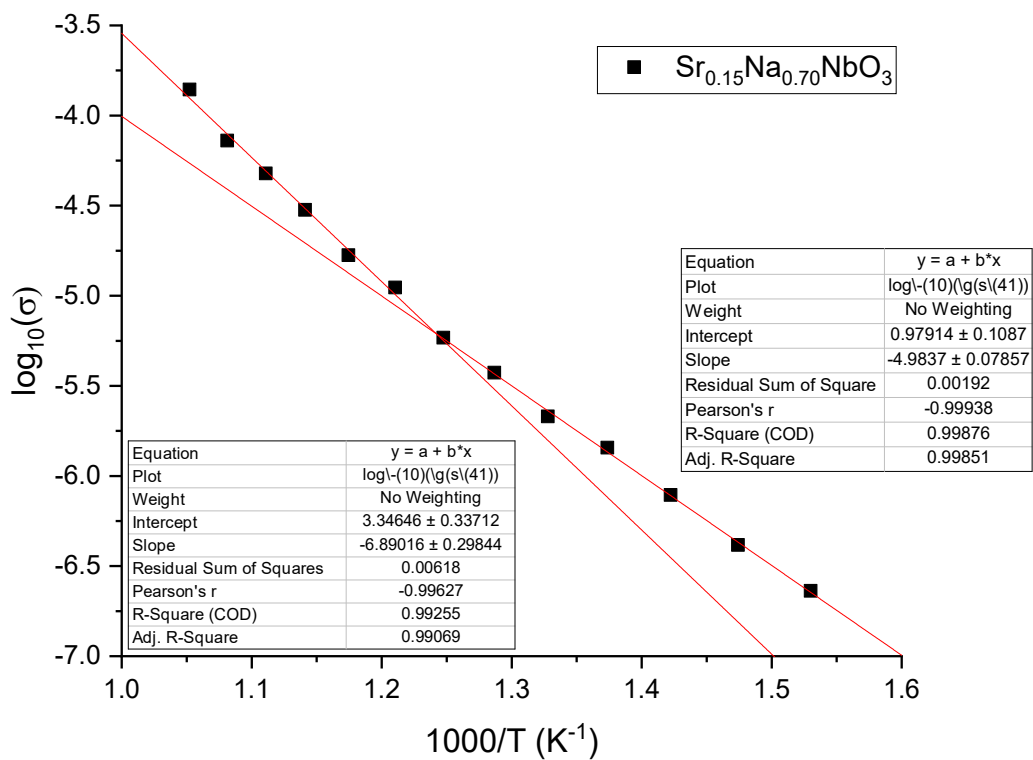

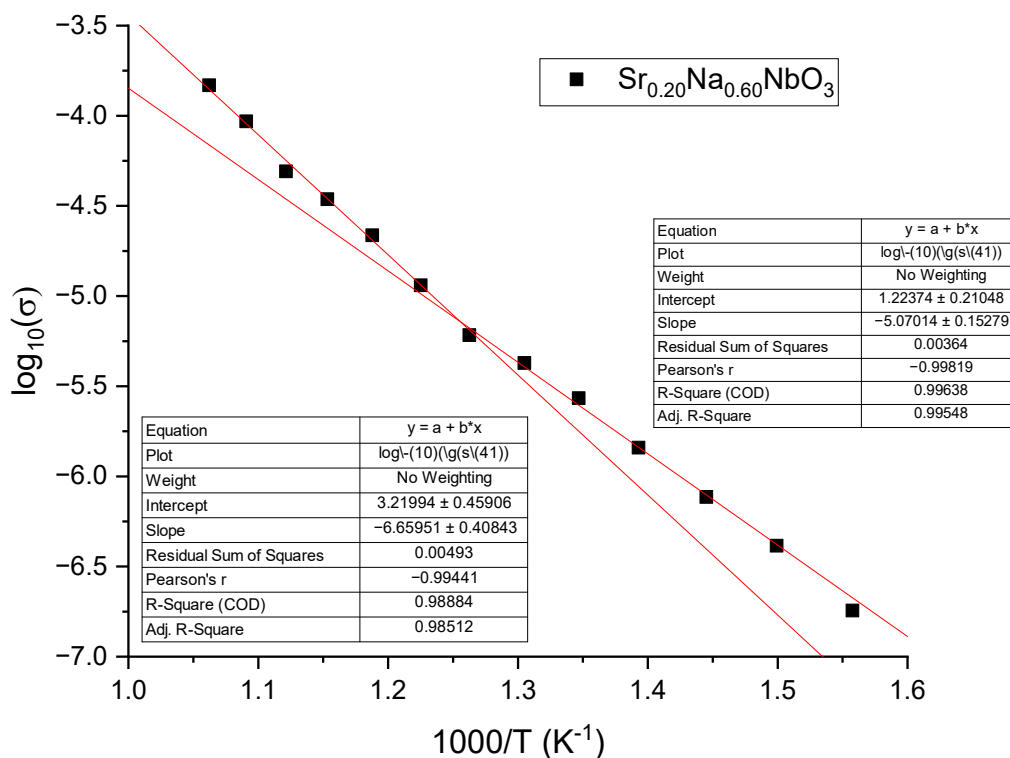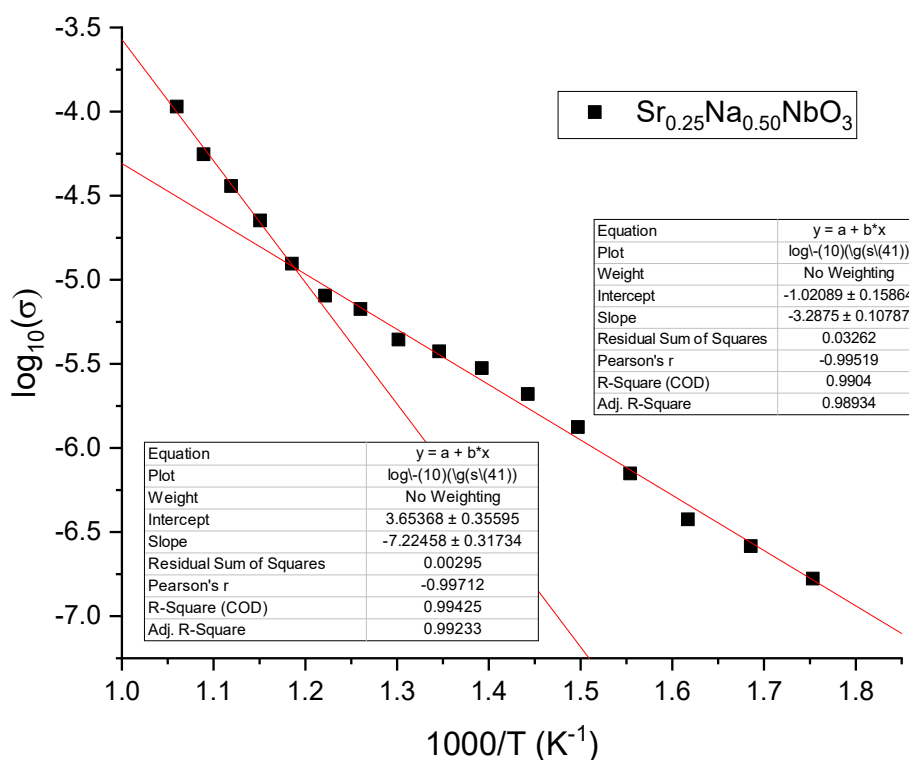

Figure S22: Arrhenius plots of conductivity calculated using  $M''$  at the relaxation frequency for (a)  $\text{NaNbO}_3$ , (b)  $\text{Sr}_{0.05}\text{Na}_{0.90}\text{NbO}_3$ , (c)  $\text{Sr}_{0.10}\text{Na}_{0.80}\text{NbO}_3$ , (d)  $\text{Sr}_{0.15}\text{Na}_{0.70}\text{NbO}_3$ , (e)  $\text{Sr}_{0.20}\text{Na}_{0.60}\text{NbO}_3$ , and (f)  $\text{Sr}_{0.25}\text{Na}_{0.50}\text{NbO}_3$ .

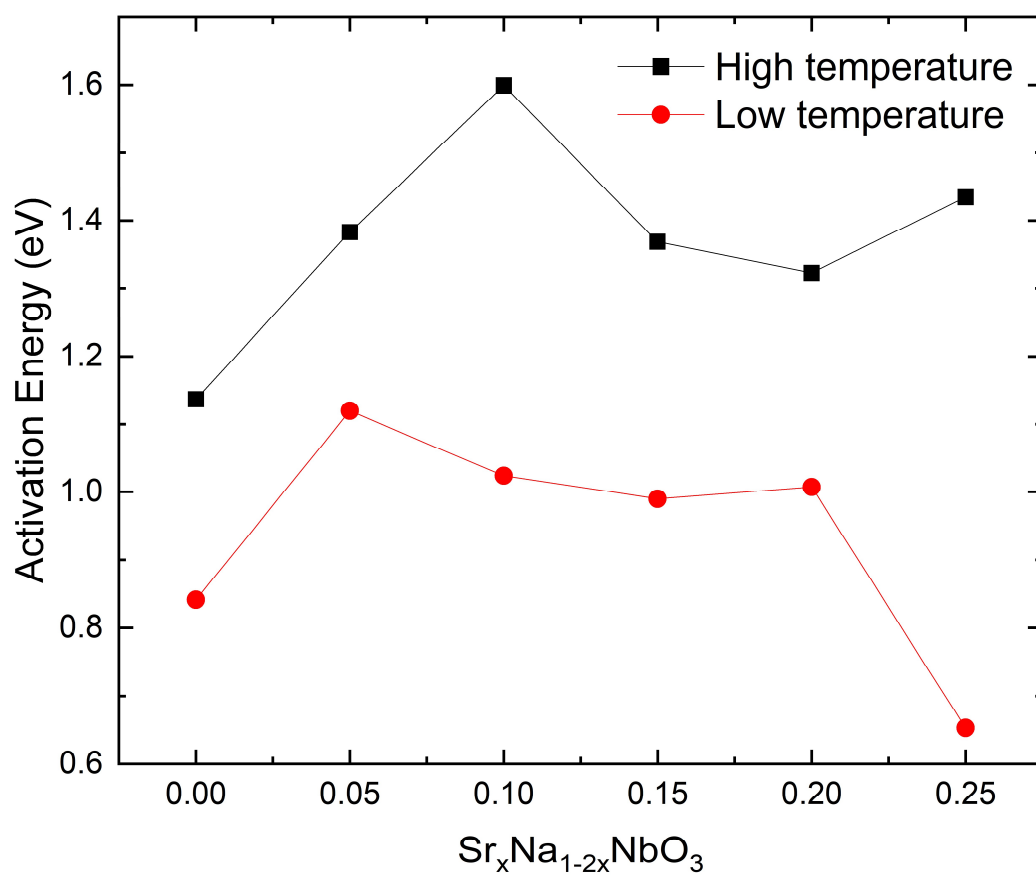

Figure S23: High temperature and low temperature activation energies extrapolated from Arrhenius plots of conductivity against composition.
