# Supplementary material for: Structural, dielectric, and conduction behaviour of A-site deficient Sr x Na 1−2 x NbO 3 ceramics
Source: Royal Society of Chemistry journal article supplement (doi:10.1039/d4tc02433h), 2024-01-01
Supplement: d4tc02433h2.zip [file d4tc02433h2.zip]

## Sheet: NaNbO3
	Polarisation (μC.cm-2)
Electric Field (kV.cm-1)	5 kV.cm-1	10 kV.cm-1	15 kV.cm-1	20 kV.cm-1	25 kV.cm-1	30 kV.cm-1	35 kV.cm-1	40 kV.cm-1
-0.031476	-0.00864
0.07732	-0.006559
0.192959	-0.004495
0.307913	-0.00255
0.413287	-0.000799
0.524136	0.000901
0.629511	0.002647
0.736938	0.004534
0.851892	0.006591
0.960688	0.008688
1.0688	0.010691
1.18239	0.012511
1.29118	0.014251
1.3945	0.016018
1.50672	0.017902
1.62099	0.019971
1.72636	0.022126
1.83106	0.024272
1.94669	0.026305
2.04796	0.028145
2.1636	0.029933
2.27034	0.031795
2.37914	0.033833
2.48793	0.036018
2.59947	0.038251
2.70689	0.040358
2.81911	0.042299
2.92517	0.044124
3.0367	0.046074
3.14618	0.048234
3.2584	0.050504
3.36241	0.052742
3.47394	0.054893
3.58411	0.056888
3.69427	0.058853
3.80033	0.060897
3.91049	0.063054
4.02476	0.065408
4.13219	0.067791
4.2403	0.070104
4.3491	0.072209
4.45858	0.074204
4.566	0.076243
4.68096	0.078269
4.79181	0.080929
4.89855	0.083383
5.00803	0.084668
4.9006	0.084314
4.79044	0.082608
4.68233	0.080527
4.57148	0.07899
4.462	0.077465
4.34773	0.076018
4.2403	0.074536
4.12603	0.072977
4.02271	0.071236
3.91186	0.0694
3.80375	0.067596
3.69769	0.065895
3.59163	0.064385
3.47394	0.062896
3.3672	0.061318
3.25635	0.059545
3.14961	0.057695
3.03534	0.055843
2.92928	0.05415
2.81501	0.052597
2.70553	0.051088
2.60357	0.049443
2.48999	0.04764
2.38256	0.04568
2.26761	0.043796
2.16155	0.042026
2.05412	0.040388
1.94396	0.038783
1.83584	0.037203
1.72226	0.035535
1.61209	0.033659
1.50809	0.031675
1.40682	0.029677
1.29187	0.027878
1.17965	0.02626
1.07085	0.024615
0.958635	0.022896
0.849839	0.02102
0.742412	0.019035
0.632248	0.017081
0.516609	0.015244
0.413287	0.013543
0.30586	0.01196
0.192959	0.010171
0.0869	0.00817
-0.02737	0.006068
-0.134797	0.00403
-0.24633	0.002123
-0.357179	0.000393
-0.469396	-0.001288
-0.576139	-0.002982
-0.688356	-0.004842
-0.79852	-0.006938
-0.903211	-0.009076
-1.01816	-0.011141
-1.12422	-0.012959
-1.23439	-0.014698
-1.34045	-0.016449
-1.45472	-0.018365
-1.56693	-0.020451
-1.66957	-0.022615
-1.77768	-0.024701
-1.8858	-0.026653
-2.00007	-0.028462
-2.10202	-0.030309
-2.21766	-0.032276
-2.32645	-0.034399
-2.43593	-0.036541
-2.54404	-0.038694
-2.65694	-0.040812
-2.76574	-0.042754
-2.8718	-0.044609
-2.98812	-0.046485
-3.09213	-0.048589
-3.20092	-0.050891
-3.30972	-0.05317
-3.41646	-0.055336
-3.52663	-0.057367
-3.64295	-0.059314
-3.75106	-0.06135
-3.85986	-0.063521
-3.97071	-0.065867
-4.07676	-0.068253
-4.1924	-0.070499
-4.29504	-0.072573
-4.40657	-0.074582
-4.51947	-0.076631
-4.62348	-0.078676
-4.7398	-0.081372
-4.84586	-0.083868
-4.95466	-0.085187
-4.84176	-0.084854
-4.73501	-0.08313
-4.62143	-0.081047
-4.51742	-0.07945
-4.41	-0.0779
-4.29778	-0.076476
-4.19035	-0.074986
-4.07403	-0.073378
-3.97002	-0.071597
-3.86396	-0.069782
-3.75243	-0.068074
-3.63474	-0.066471
-3.53142	-0.064981
-3.4281	-0.063476
-3.31177	-0.061833
-3.20229	-0.060058
-3.08323	-0.058181
-2.98744	-0.056305
-2.8759	-0.05456
-2.76711	-0.052978
-2.65694	-0.051532
-2.55089	-0.049998
-2.43662	-0.04821
-2.3244	-0.046272
-2.21834	-0.04435
-2.10749	-0.042559
-1.99664	-0.040943
-1.88716	-0.039356
-1.78042	-0.037718
-1.67847	-0.035988
-1.56146	-0.03406
-1.45335	-0.032103
-1.33976	-0.030237
-1.23439	-0.028518
-1.12285	-0.026865
-1.01269	-0.025153
-0.905264	-0.023379
-0.794415	-0.021495
-0.685619	-0.019557
-0.580929	-0.017606
-0.471449	-0.015724
-0.359232	-0.014223
-0.248383	-0.012561
-0.140956	-0.010045
0.026002	-0.008468
0.029423	-0.007432
-0.030107		-0.034828
0.078005		-0.031761
0.254541		-0.0286
0.420814		-0.025425
0.578876		-0.022132
0.741728		-0.019411
0.908001		-0.016896
1.01543		-0.01434
1.17691		-0.011514
1.34181		-0.008321
1.51014		-0.004753
1.67436		-0.001254
1.842		0.002287
2.00143		0.005684
2.1595		0.008909
2.32645		0.01199
2.4893		0.015001
2.65694		0.018241
2.81774		0.021467
2.98744		0.024642
3.09418		0.027921
3.25498		0.03139
3.41646		0.035052
3.58753		0.038795
3.75243		0.042212
3.91255		0.04551
4.07676		0.048751
4.23756		0.05215
4.40521		0.055763
4.57627		0.059469
4.73433		0.06347
4.89992		0.067388
5.06688		0.071029
5.1743		0.074495
5.33442		0.077891
5.5089		0.08133
5.66765		0.084924
5.82571		0.08847
5.99609		0.092235
6.16099		0.096259
6.31837		0.100502
6.49012		0.10478
6.6516		0.108923
6.81582		0.113143
6.98278		0.117027
7.1381		0.120547
7.25374		0.123864
7.41728		0.127291
7.57944		0.131168
7.74366		0.135481
7.90515		0.139865
8.07553		0.144391
8.23496		0.148881
8.39712		0.153254
8.56887		0.157388
8.73104		0.161484
8.89184		0.16537
9.05537		0.169096
9.16417		0.172867
9.32565		0.176853
9.48987		0.181045
9.65751		0.186329
9.82652		0.191034
9.98869		0.193675
9.82037		0.193505
9.65409		0.191088
9.49672		0.187862
9.32428		0.185545
9.16212		0.183397
9.05879		0.181515
8.88978		0.179707
8.73104		0.177705
8.56682		0.175406
8.40054		0.173098
8.23427		0.170583
8.06595		0.167901
7.90652		0.165124
7.74366		0.162442
7.57465		0.159747
7.41659		0.157363
7.25169		0.155347
7.14837		0.153477
6.97662		0.151476
6.81856		0.149128
6.6475		0.146399
6.48806		0.143589
6.32042		0.140674
6.15962		0.137833
5.99609		0.13512
5.82434		0.132597
5.66217		0.13026
5.49658		0.127822
5.3351		0.125433
5.1743		0.123151
5.06414		0.120767
4.89787		0.118161
4.73091		0.115209
4.57011		0.112094
4.40794		0.109275
4.24578		0.106647
4.07471		0.104152
3.9146		0.101739
3.75312		0.099219
3.58889		0.096587
3.42125		0.093567
3.25909		0.090488
3.09144		0.087598
2.98196		0.084947
2.8239		0.082317
2.65284		0.079604
2.49546		0.076804
2.32714		0.074241
2.16086		0.071619
1.99733		0.068834
1.83721		0.065833
1.68189		0.06265
1.51014		0.059369
1.34661		0.055932
1.18307		0.05282
1.01748		0.050197
0.901842		0.047891
0.741728		0.045542
0.575455		0.04285
0.41055		0.039637
0.251804		0.03654
0.0869		0.033469
-0.019159		0.030359
-0.192959		0.027233
-0.356495		0.024053
-0.522767		0.020703
-0.684935		0.017816
-0.844365		0.015224
-0.957951		0.01269
-1.12285		0.009925
-1.29323		0.006682
-1.44856		0.003044
-1.61346		-0.000573
-1.78042		-0.00412
-1.94053		-0.007548
-2.11023		-0.010831
-2.26692		-0.013968
-2.43046		-0.017015
-2.60221		-0.02034
-2.76232		-0.023591
-2.92859		-0.026777
-3.03807		-0.029984
-3.20366		-0.033419
-3.36104		-0.037168
-3.53073		-0.041013
-3.6929		-0.044475
-3.86191		-0.047759
-4.01587		-0.050978
-4.18693		-0.054322
-4.34978		-0.05785
-4.514		-0.061542
-4.68164		-0.065648
-4.84381		-0.069689
-5.0094		-0.073359
-5.11477		-0.076777
-5.27899		-0.080146
-5.44048		-0.08363
-5.6047		-0.087266
-5.77302		-0.090783
-5.93724		-0.094469
-6.10215		-0.098422
-6.25816		-0.102625
-6.42717		-0.106957
-6.59481		-0.111225
-6.75834		-0.115531
-6.92119		-0.119385
-7.08063		-0.122841
-7.19421		-0.126099
-7.3598		-0.129565
-7.52265		-0.133469
-7.68756		-0.137773
-7.85041		-0.142063
-8.01736		-0.146563
-8.17611		-0.150977
-8.34102		-0.155347
-8.50181		-0.159502
-8.67219		-0.163651
-8.82752		-0.167527
-8.99721		-0.17114
-9.10943		-0.17474
-9.26749		-0.178692
-9.43582		-0.182878
-9.59593		-0.188192
-9.76836		-0.192825
-9.9319		-0.195389
-9.7622		-0.195174
-9.60072		-0.192755
-9.43376		-0.18953
-9.27228		-0.187276
-9.11148		-0.18512
-8.99721		-0.183222
-8.83573		-0.181336
-8.66945		-0.179323
-8.50797		-0.177102
-8.34375		-0.174895
-8.18159		-0.172364
-8.0201		-0.169638
-7.85657		-0.166828
-7.6855		-0.164148
-7.52744		-0.161416
-7.35638		-0.159059
-7.19489		-0.157093
-7.08678		-0.155344
-6.91777		-0.153347
-6.75424		-0.150974
-6.58933		-0.148231
-6.43332		-0.145444
-6.2561		-0.142567
-6.10078		-0.139699
-5.93793		-0.136909
-5.77097		-0.134371
-5.6088		-0.132034
-5.43979		-0.129641
-5.28105		-0.127386
-5.11888		-0.125147
-5.01145		-0.122742
-4.84449		-0.120086
-4.67617		-0.117066
-4.51469		-0.114003
-4.34978		-0.111216
-4.18625		-0.108576
-4.02476		-0.106037
-3.86191		-0.103677
-3.69016		-0.10118
-3.53005		-0.098606
-3.35967		-0.095615
-3.19887		-0.092591
-3.0367		-0.089691
-2.92517		-0.086956
-2.76437		-0.084222
-2.59947		-0.081568
-2.43456		-0.078874
-2.26898		-0.07641
-2.10544		-0.073796
-1.93985		-0.071
-1.77837		-0.068
-1.61757		-0.064805
-1.44924		-0.061483
-1.28571		-0.058126
-1.11875		-0.055081
-0.957951		-0.052451
-0.850524		-0.050059
-0.685619		-0.047615
-0.520715		-0.045215
-0.354442		-0.042248
-0.194327		-0.03796
0.026002		-0.035242
0.02737		-0.03358
-0.084163			-0.078499
0.139587			-0.074034
0.361284			-0.069235
0.58435			-0.064388
0.849839			-0.059209
1.0729			-0.053654
1.34387			-0.048198
1.56557			-0.042747
1.7811			-0.037231
2.05412			-0.031648
2.27308			-0.025724
2.54473			-0.02019
2.76164			-0.014777
2.98128			-0.009114
3.25703			-0.00366
3.47941			0.002161
3.69837			0.007922
3.96934			0.013941
4.18488			0.02048
4.46337			0.026674
4.68438			0.032673
4.90676			0.038786
5.17841			0.044559
5.396			0.050708
5.60812			0.056725
5.88592			0.062972
6.10283			0.069785
6.37585			0.07635
6.59618			0.082912
6.81856			0.089457
7.0861			0.096062
7.30917			0.103044
7.58013			0.109605
7.7984			0.116023
8.016			0.122751
8.29243			0.129188
8.50866			0.136159
8.72693			0.143036
9.00132			0.150102
9.21686			0.157606
9.49466			0.164675
9.71088			0.171527
9.9319			0.178333
10.2022			0.185206
10.4218			0.1926
10.6948			0.19967
10.9159			0.206699
11.1355			0.214031
11.4099			0.221099
11.6364			0.228449
11.8512			0.235543
12.127			0.242619
12.3384			0.250041
12.6169			0.257094
12.8311			0.264019
13.0507			0.271224
13.3196			0.278241
13.5441			0.28562
13.7575			0.292795
14.0326			0.300048
14.2502			0.307272
14.526			0.315352
14.7429			0.322415
14.9632			0.326766
14.7463			0.326864
14.526			0.324048
14.2482			0.320155
14.0347			0.317103
13.761			0.314012
13.5454			0.310926
13.3278			0.307527
13.0521			0.304238
12.8263			0.30061
12.6148			0.297075
12.3411			0.293456
12.1208			0.289545
11.8478			0.28603
11.6282			0.282676
11.4112			0.279164
11.141			0.275835
10.9117			0.272213
10.6976			0.26865
10.4205			0.264907
10.2104			0.260737
9.93121			0.256864
9.7102			0.253064
9.49808			0.249454
9.21754			0.245854
8.99653			0.241951
8.73446			0.238246
8.50866			0.234559
8.28559			0.230557
8.01942			0.226778
7.79772			0.222613
7.57739			0.218641
7.30643			0.214598
7.09089			0.210348
6.81445			0.206411
6.59549			0.202568
6.37653			0.198645
6.10762			0.194652
5.87429			0.190173
5.61359			0.185867
5.39326			0.181584
5.17293			0.177122
4.90266			0.172951
4.68164			0.168664
4.46542			0.164552
4.19104			0.160342
3.97071			0.155681
3.69495			0.151251
3.47394			0.146843
3.25361			0.142151
2.98128			0.137682
2.76437			0.132925
2.55294			0.128262
2.27103			0.123633
2.05207			0.118677
1.77768			0.114061
1.5683			0.109436
1.34455			0.104679
1.07017			0.099673
0.853945			0.094302
0.576139			0.089029
0.358547			0.084008
0.140956			0.079012
-0.080742			0.074469
-0.304492			0.06956
-0.518662			0.064657
-0.793046			0.059374
-1.00995			0.053793
-1.28639			0.048379
-1.50672			0.042885
-1.72705			0.037344
-1.9987			0.0317
-2.21355			0.025642
-2.48246			0.020051
-2.70553			0.014607
-2.92654			0.008986
-3.20366			0.003568
-3.42331			-0.002323
-3.64295			-0.00811
-3.91118			-0.014125
-4.1315			-0.020615
-4.40726			-0.026794
-4.62143			-0.032882
-4.84449			-0.039065
-5.11341			-0.044875
-5.331			-0.051045
-5.55133			-0.057036
-5.82571			-0.063235
-6.04056			-0.070028
-6.32179			-0.076629
-6.53801			-0.083199
-6.75766			-0.089712
-7.02999			-0.096292
-7.24485			-0.103237
-7.52334			-0.10982
-7.74366			-0.116245
-7.95852			-0.122931
-8.23564			-0.129375
-8.44981			-0.136271
-8.67151			-0.143009
-8.937			-0.14995
-9.16622			-0.157341
-9.43718			-0.164378
-9.65546			-0.171174
-9.87442			-0.177898
-10.1488			-0.184688
-10.3602			-0.192
-10.638			-0.199005
-10.8604			-0.205963
-11.0732			-0.213246
-11.349			-0.220225
-11.5727			-0.227503
-11.7903			-0.234509
-12.0599			-0.241554
-12.2775			-0.248987
-12.5533			-0.256031
-12.7695			-0.262897
-12.9905			-0.270015
-13.2656			-0.27691
-13.4838			-0.284239
-13.7001			-0.29137
-13.9786			-0.298549
-14.1914			-0.305769
-14.4664			-0.313718
-14.6895			-0.32066
-14.903			-0.324887
-14.684			-0.324933
-14.4685			-0.322139
-14.1989			-0.318211
-13.9779			-0.315059
-13.7021			-0.311905
-13.4845			-0.30879
-13.2663			-0.305434
-12.9878			-0.3022
-12.7709			-0.298548
-12.5546			-0.295036
-12.2734			-0.291402
-12.0695			-0.287482
-11.7883			-0.283981
-11.5686			-0.280666
-11.3558			-0.27716
-11.078			-0.273872
-10.8618			-0.270231
-10.6428			-0.266629
-10.3657			-0.262837
-10.1481			-0.258668
-9.87374			-0.2548
-9.65136			-0.251045
-9.43445			-0.247357
-9.15938			-0.243648
-8.93973			-0.239657
-8.67288			-0.235986
-8.45118			-0.232364
-8.23222			-0.228346
-7.95305			-0.22448
-7.73477			-0.220339
-7.52197			-0.216387
-7.24827			-0.212366
-7.02931			-0.208057
-6.75834			-0.20409
-6.53596			-0.200208
-6.31221			-0.196329
-6.04878			-0.192316
-5.81818			-0.187871
-5.55064			-0.183621
-5.33168			-0.179371
-5.11272			-0.174881
-4.84586			-0.170719
-4.62485			-0.166376
-4.40384			-0.162261
-4.13835			-0.15802
-3.91323			-0.153378
-3.64295			-0.148985
-3.42057			-0.144541
-3.19819			-0.139791
-2.92517			-0.135253
-2.70826			-0.130453
-2.48862			-0.125867
-2.21287			-0.121184
-1.99527			-0.116161
-1.7291			-0.111501
-1.50125			-0.106877
-1.28502			-0.102213
-1.01337			-0.097218
-0.793731			-0.092269
-0.52003			-0.086945
-0.301755			-0.08001
0.026686			-0.075845
0.024633			-0.073573
-0.078689				-0.127352
0.137534				-0.12101
0.472817				-0.114323
0.806047				-0.106754
1.12422				-0.098279
1.45745				-0.090123
1.78521				-0.082109
2.05207				-0.074176
2.38325				-0.066319
2.70895				-0.058252
3.03944				-0.050052
3.36241				-0.041635
3.69974				-0.033281
4.02408				-0.024912
4.29778				-0.016417
4.62553				-0.007455
4.95876				0.001785
5.28173				0.011521
5.60812				0.020695
5.94614				0.029488
6.21231				0.038041
6.54623				0.046764
6.8644				0.055861
7.19695				0.065867
7.52334				0.075669
7.85999				0.08543
8.1289				0.095063
8.45597				0.1048
8.78715				0.114705
9.11011				0.124747
9.43787				0.134605
9.77384				0.144355
10.092				0.153841
10.3719				0.163456
10.6996				0.173415
11.0308				0.183889
11.3558				0.194894
11.6863				0.205405
12.0154				0.215378
12.283				0.224984
12.6128				0.234555
12.9419				0.244454
13.2683				0.25461
13.5947				0.265043
13.9266				0.275511
14.2495				0.285901
14.528				0.296084
14.8585				0.306231
15.1835				0.316422
15.5147				0.326876
15.8363				0.336712
16.1723				0.346355
16.4412				0.35585
16.7676				0.365677
17.0987				0.375942
17.4238				0.386808
17.7549				0.397336
18.0806				0.407542
18.3571				0.41728
18.6794				0.426907
19.0099				0.436147
19.3376				0.447333
19.6667				0.457582
19.9972				0.463913
19.6688				0.464694
19.3383				0.461159
19.0167				0.456032
18.6835				0.452443
18.3537				0.448341
18.0847				0.444041
17.7549				0.439394
17.4285				0.434478
17.096				0.429204
16.7648				0.424549
16.4419				0.42021
16.162				0.416102
15.8411				0.411862
15.5154				0.407377
15.1801				0.402316
14.8558				0.397397
14.5253				0.392353
14.255				0.387392
13.9279				0.382329
13.6015				0.377254
13.2676				0.372237
12.9447				0.367422
12.6142				0.362671
12.2837				0.358045
12.0107				0.353236
11.6836				0.34811
11.3558				0.342621
11.0212				0.336734
10.6976				0.331153
10.3719				0.325957
10.0954				0.321005
9.7711				0.316132
9.43924				0.31102
9.11285				0.305632
8.78167				0.299964
8.45939				0.294156
8.12753				0.288358
7.85588				0.282653
7.52539				0.276857
7.19832				0.27103
6.86988				0.265003
6.54281				0.259403
6.21231				0.253971
5.93724				0.248516
5.60949				0.242667
5.28447				0.236381
4.96219				0.229484
4.62622				0.222853
4.29436				0.216426
4.02613				0.210213
3.70043				0.204038
3.37062				0.19778
3.04149				0.191271
2.71032				0.184565
2.38188				0.177706
2.05617				0.170772
1.78453				0.16375
1.45745				0.156565
1.12696				0.149137
0.793731				0.141304
0.47487				0.134102
0.148482				0.127468
-0.08211				0.121029
-0.407813				0.114266
-0.738991				0.106717
-1.06469				0.098217
-1.39792				0.089934
-1.72021				0.081801
-1.99322				0.073742
-2.32303				0.065721
-2.65489				0.057552
-2.9847				0.04926
-3.31177				0.040835
-3.63816				0.032396
-3.96728				0.023946
-4.24714				0.015401
-4.56669				0.006524
-4.89513				-0.002721
-5.22904				-0.012519
-5.54654				-0.021749
-5.87771				-0.030611
-6.1521				-0.03915
-6.48464				-0.047846
-6.81172				-0.056963
-7.14084				-0.066874
-7.46654				-0.076695
-7.7943				-0.086502
-8.06732				-0.096114
-8.39165				-0.105808
-8.72351				-0.115687
-9.04853				-0.125605
-9.38245				-0.135469
-9.70678				-0.145158
-10.0366				-0.154628
-10.3123				-0.164199
-10.6374				-0.174103
-10.9692				-0.184415
-11.2977				-0.19528
-11.6213				-0.205696
-11.9532				-0.215629
-12.2262				-0.225177
-12.5451				-0.234611
-12.8817				-0.244356
-13.2122				-0.254457
-13.54				-0.264863
-13.8657				-0.275309
-14.1914				-0.285572
-14.4719				-0.295627
-14.7956				-0.305707
-15.1233				-0.31579
-15.4504				-0.32616
-15.7727				-0.335997
-16.1073				-0.345502
-16.3796				-0.354881
-16.7067				-0.364561
-17.0324				-0.374719
-17.3649				-0.385562
-17.692				-0.396078
-18.0245				-0.406196
-18.2969				-0.4159
-18.6239				-0.425405
-18.9558				-0.43453
-19.2726				-0.445566
-19.6181				-0.455725
-19.935				-0.462004
-19.6134				-0.462784
-19.2781				-0.459123
-18.9565				-0.45396
-18.6287				-0.450377
-18.2975				-0.446288
-18.017				-0.442003
-17.6927				-0.437339
-17.3635				-0.432381
-17.0344				-0.427174
-16.706				-0.422477
-16.3796				-0.41813
-16.1052				-0.41406
-15.7747				-0.409845
-15.4538				-0.405367
-15.1247				-0.400309
-14.7969				-0.395273
-14.4657				-0.390222
-14.1914				-0.385232
-13.867				-0.380203
-13.5324				-0.375212
-13.2047				-0.370208
-12.8831				-0.365309
-12.5505				-0.360549
-12.2248				-0.355889
-11.9532				-0.35109
-11.6261				-0.345956
-11.2936				-0.340408
-10.9637				-0.334461
-10.6422				-0.328915
-10.3171				-0.323725
-10.0386				-0.318845
-9.70336				-0.313983
-9.37902				-0.308817
-9.04716				-0.303408
-8.7242				-0.297712
-8.39302				-0.2919
-8.05979				-0.28614
-7.79361				-0.280401
-7.46449				-0.27458
-7.13673				-0.268771
-6.81172				-0.262724
-6.48396				-0.257141
-6.15141				-0.251725
-5.88319				-0.246271
-5.55064				-0.240432
-5.22767				-0.234116
-4.8965				-0.227177
-4.56874				-0.220528
-4.24304				-0.214106
-3.96592				-0.207905
-3.63953				-0.201765
-3.30698				-0.195462
-2.97854				-0.188929
-2.64873				-0.182261
-2.32303				-0.175435
-1.9898				-0.16856
-1.72294				-0.161563
-1.39313				-0.154209
-1.06948				-0.147235
-0.743096				-0.139592
-0.409866				-0.129914
0.026686				-0.124235
0.029423				-0.120941
-0.137534					-0.174707
0.19159					-0.165857
0.582982					-0.156686
1.02364					-0.146879
1.40203					-0.136454
1.78521					-0.125727
2.22587					-0.115058
2.60289					-0.103974
2.98333					-0.092924
3.42262					-0.082014
3.80717					-0.07132
4.18351					-0.060575
4.57353					-0.049524
5.0094					-0.037965
5.39326					-0.025988
5.77713					-0.013694
6.21163					-0.001537
6.60165					0.011111
6.97936					0.023691
7.41728					0.035845
7.80114					0.04821
8.18432					0.060611
8.61814					0.073085
9.00884					0.085671
9.38997					0.098338
9.7711					0.111415
10.2063					0.124729
10.5888					0.138115
10.9692					0.151376
11.4106					0.164108
11.7917					0.177029
12.1769					0.189911
12.6142					0.202686
12.9932					0.215551
13.3757					0.228511
13.7637					0.241777
14.1961					0.255227
14.5855					0.26871
14.9666					0.282045
15.4066					0.294853
15.7863					0.307697
16.1723					0.320546
16.604					0.333092
16.9852					0.346175
17.3697					0.359418
17.8131					0.372821
18.1929					0.386098
18.5822					0.399207
18.9558					0.412082
19.3999					0.424881
19.7783					0.43763
20.1676					0.450441
20.5973					0.462891
20.9819					0.475826
21.3609					0.488897
21.8009					0.502148
22.1779					0.51533
22.5734					0.528313
22.9436					0.541128
23.3802					0.553845
23.7716					0.565862
24.1582					0.57981
24.5933					0.592893
24.9751					0.601186
24.5947					0.602262
24.152					0.597747
23.7668					0.591673
23.3863					0.587212
22.9518					0.581982
22.5693					0.576499
22.1841					0.570829
21.805					0.565003
21.3623					0.559065
20.9839					0.553189
20.5994					0.547428
20.158					0.542092
19.7789					0.536553
19.3944					0.530927
18.9606					0.525056
18.576					0.519068
18.1949					0.51294
17.8097					0.506659
17.3711					0.500241
16.9927					0.493974
16.6109					0.487826
16.1695					0.482036
15.7857					0.475981
15.4066					0.469866
14.9625					0.463775
14.5827					0.457222
14.1961					0.450376
13.7603					0.443454
13.3792					0.436652
12.996					0.430118
12.6162					0.423685
12.1762					0.417285
11.7937					0.410804
11.4112					0.40415
10.972					0.397436
10.5888					0.390208
10.207					0.382794
9.7711					0.375337
9.38313					0.367933
9.00269					0.360713
8.62908					0.353531
8.18364					0.346396
7.79498					0.339172
7.41728					0.33177
6.98483					0.324314
6.59891					0.31631
6.21505					0.307983
5.77781					0.299814
5.38984					0.291323
5.01693					0.282968
4.5749					0.274765
4.1924					0.266728
3.80375					0.258676
3.42946					0.250406
2.9847					0.241722
2.60152					0.232635
2.22108					0.223182
1.78384					0.213835
1.4034					0.204144
1.01406					0.194346
0.583666					0.184892
0.195696					0.175914
-0.13206					0.167119
-0.520715					0.157935
-0.958635					0.14798
-1.34113					0.137317
-1.72226					0.126422
-2.15607					0.115638
-2.54541					0.104435
-2.9238					0.093291
-3.36309					0.082261
-3.74832					0.071404
-4.1315					0.060568
-4.5099					0.049495
-4.95397					0.037958
-5.33373					0.025976
-5.71418					0.013586
-6.15415					0.001351
-6.54007					-0.011285
-6.91641					-0.023873
-7.35159					-0.036031
-7.7334					-0.048378
-8.12411					-0.060722
-8.55587					-0.073082
-8.94589					-0.085574
-9.3236					-0.098189
-9.70267					-0.111136
-10.1447					-0.124333
-10.5292					-0.137717
-10.9076					-0.150952
-11.3469					-0.163638
-11.7342					-0.176437
-12.116					-0.18916
-12.5485					-0.201862
-12.9378					-0.214621
-13.3189					-0.227462
-13.7007					-0.240615
-14.1352					-0.253947
-14.5198					-0.267346
-14.9016					-0.280548
-15.3375					-0.293172
-15.7248					-0.305966
-16.1011					-0.318735
-16.5445					-0.331161
-16.9277					-0.344148
-17.3136					-0.357303
-17.744					-0.370553
-18.1333					-0.383687
-18.5124					-0.396634
-18.8949					-0.409424
-19.3362					-0.422144
-19.7146					-0.43473
-20.0971					-0.447333
-20.5385					-0.459682
-20.9196					-0.472562
-21.3					-0.485634
-21.7393					-0.498778
-22.1246					-0.511779
-22.5077					-0.524638
-22.8848					-0.537318
-23.3295					-0.549915
-23.7113					-0.561884
-24.0931					-0.575701
-24.5359					-0.58863
-24.9177					-0.596816
-24.5311					-0.597785
-24.0938					-0.593257
-23.7065					-0.587172
-23.3343					-0.582607
-22.8834					-0.577322
-22.5057					-0.571854
-22.1266					-0.566161
-21.7455					-0.560254
-21.3028					-0.554244
-20.9244					-0.548378
-20.5398					-0.542673
-20.0999					-0.537341
-19.7167					-0.531732
-19.3356					-0.526063
-18.9011					-0.520188
-18.5158					-0.51421
-18.1258					-0.508035
-17.7501					-0.50168
-17.3102					-0.49523
-16.9332					-0.488945
-16.5459					-0.482827
-16.1093					-0.477068
-15.7227					-0.471016
-15.3409					-0.464854
-14.905					-0.458649
-14.5212					-0.451989
-14.14					-0.445147
-13.7001					-0.438293
-13.3183					-0.431485
-12.9344					-0.424923
-12.5546					-0.418466
-12.1167					-0.412034
-11.7328					-0.405486
-11.3524					-0.398809
-10.9117					-0.392065
-10.5272					-0.384834
-10.144					-0.377327
-9.70541					-0.3698
-9.32086					-0.362366
-8.94521					-0.355244
-8.56408					-0.34814
-8.12342					-0.34101
-7.73819					-0.333703
-7.35433					-0.326238
-6.91572					-0.318672
-6.53186					-0.310634
-6.15141					-0.302278
-5.71691					-0.294091
-5.33305					-0.285566
-4.95261					-0.277201
-4.51263					-0.268999
-4.12945					-0.261009
-3.74559					-0.253006
-3.36309					-0.244726
-2.91559					-0.235972
-2.54336					-0.226838
-2.15539					-0.217374
-1.72226					-0.20788
-1.33771					-0.198915
-0.959319					-0.189266
-0.517978					-0.176437
0.032844					-0.16865
0.03216					-0.164094
-0.190222						-0.220949
0.247699						-0.209097
0.74857						-0.197168
1.18581						-0.185211
1.67368						-0.172438
2.1595						-0.159487
2.65831						-0.14626
3.0976						-0.133028
3.58684						-0.119397
4.08155						-0.104986
4.57216						-0.090307
5.06619						-0.07604
5.5048						-0.061884
5.99609						-0.047272
6.48875						-0.032303
6.98072						-0.017181
7.41659						-0.002231
7.91062						0.01337
8.40328						0.029296
8.89526						0.045268
9.32907						0.060787
9.82379						0.0767
10.3158						0.092672
10.8077						0.108622
11.2436						0.124223
11.7424						0.139981
12.2289						0.156358
12.7223						0.172972
13.2197						0.189102
13.6529						0.204977
14.1435						0.221148
14.6423						0.237354
15.1274						0.253314
15.5701						0.268769
16.0594						0.284588
16.5493						0.300545
17.044						0.316553
17.484						0.332254
17.9712						0.348359
18.4666						0.364579
18.9599						0.380637
19.393						0.396192
19.8864						0.411709
20.3777						0.427706
20.8738						0.443841
21.3616						0.459494
21.8023						0.474972
22.2963						0.4909
22.7849						0.507041
23.2775						0.523029
23.7148						0.538558
24.2149						0.554389
24.7008						0.570221
25.1975						0.585983
25.6354						0.601308
26.1233						0.616973
26.6132						0.632825
27.1073						0.648765
27.5479						0.66443
28.0344						0.680138
28.5291						0.695617
29.0245						0.71352
29.5124						0.729737
29.9469						0.739547
29.5172						0.740784
29.0163						0.735143
28.5237						0.727292
28.0358						0.721527
27.5493						0.715463
27.1039						0.709314
26.6153						0.702775
26.1261						0.695985
25.6293						0.689097
25.1948						0.682345
24.7008						0.675297
24.2122						0.668155
23.7161						0.661108
23.2768						0.654418
22.7897						0.647514
22.299						0.640428
21.8036						0.633312
21.365						0.626299
20.8738						0.618979
20.3831						0.611156
19.8836						0.60332
19.3951						0.595849
18.964						0.588531
18.4713						0.581022
17.9718						0.573445
17.486						0.565862
17.0378						0.55842
16.5507						0.550511
16.0573						0.542378
15.5729						0.534149
15.1247						0.526209
14.6395						0.517907
14.1469						0.509513
13.6508						0.501222
13.2136						0.493246
12.7257						0.485044
12.2378						0.476286
11.7431						0.467322
11.2498						0.458562
10.8077						0.449745
10.3192						0.440577
9.82242						0.431267
9.32702						0.422048
8.89252						0.413136
8.40123						0.403879
7.91062						0.394387
7.41249						0.384766
6.98346						0.37524
6.48396						0.36519
5.99746						0.354815
5.50138						0.344489
5.07303						0.334293
4.57011						0.323924
4.08361						0.313015
3.59779						0.302024
3.10034						0.291243
2.65968						0.280432
2.1636						0.269034
1.67436						0.257366
1.17623						0.245289
0.749939						0.233649
0.253173						0.221709
-0.186116						0.20978
-0.684251						0.197685
-1.1208						0.185633
-1.61209						0.172699
-2.10133						0.159612
-2.5892						0.146221
-3.03397						0.132814
-3.52184						0.118931
-4.02134						0.104353
-4.51126						0.089567
-5.00529						0.075273
-5.435						0.061073
-5.93382						0.046355
-6.4299						0.031339
-6.91983						0.016167
-7.35296						0.001124
-7.84699						-0.014549
-8.34033						-0.030457
-8.83299						-0.046348
-9.26749						-0.061799
-9.75947						-0.077683
-10.2535						-0.093641
-10.7509						-0.109442
-11.1841						-0.124939
-11.6767						-0.140616
-12.168						-0.156941
-12.66						-0.173465
-13.1465						-0.189478
-13.5899						-0.20525
-14.0832						-0.221319
-14.5718						-0.23731
-15.0693						-0.253135
-15.5092						-0.268459
-15.9937						-0.28419
-16.4904						-0.300072
-16.9831						-0.315955
-17.4197						-0.331485
-17.9109						-0.347498
-18.4043						-0.363517
-18.9011						-0.379435
-19.3328						-0.394944
-19.8296						-0.410388
-20.3222						-0.426249
-20.8108						-0.442247
-21.2987						-0.45777
-21.7421						-0.473249
-22.2327						-0.489091
-22.7267						-0.505051
-23.2159						-0.520895
-23.6498						-0.53636
-24.1424						-0.552063
-24.6412						-0.567779
-25.1339						-0.583309
-25.5657						-0.598506
-26.0611						-0.614074
-26.5537						-0.629789
-27.043						-0.645577
-27.4863						-0.661149
-27.9763						-0.676683
-28.4648						-0.692045
-28.9527						-0.709726
-29.4529						-0.725777
-29.8826						-0.73552
-29.4488						-0.73667
-28.9623						-0.730931
-28.4635						-0.723111
-27.9735						-0.717305
-27.487						-0.711224
-27.0518						-0.705035
-26.553						-0.69849
-26.0672						-0.691706
-25.5759						-0.684812
-25.1325						-0.677977
-24.6351						-0.670889
-24.1438						-0.663788
-23.6525						-0.656762
-23.2173						-0.650047
-22.7246						-0.643084
-22.2306						-0.636005
-21.7386						-0.628917
-21.3021						-0.621848
-20.8115						-0.614524
-20.3161						-0.606699
-19.8282						-0.598865
-19.3335						-0.591385
-18.8963						-0.584061
-18.4077						-0.576496
-17.9096						-0.568935
-17.4238						-0.561273
-16.9831						-0.553756
-16.4945						-0.545857
-15.9971						-0.537736
-15.5065						-0.529457
-15.0693						-0.521471
-14.5745						-0.513158
-14.0819						-0.50486
-13.592						-0.496587
-13.152						-0.488563
-12.6641						-0.48032
-12.1735						-0.471548
-11.6815						-0.46255
-11.182						-0.453778
-10.7509						-0.444903
-10.2549						-0.435742
-9.75947						-0.426478
-9.26681						-0.417195
-8.82752						-0.408216
-8.34033						-0.398915
-7.85041						-0.389355
-7.35569						-0.37969
-6.91846						-0.370137
-6.42443						-0.360048
-5.93519						-0.349722
-5.44458						-0.339355
-5.00871						-0.329094
-4.51058						-0.318801
-4.01929						-0.307908
-3.52115						-0.296893
-3.03807						-0.286074
-2.5981						-0.275242
-2.10407						-0.263657
-1.61688						-0.253049
-1.12012						-0.240991
-0.685619						-0.224683
0.02737						-0.214769
0.033528						-0.208673
-0.243593							-0.265588
0.304492							-0.250782
0.853945							-0.236036
1.4034							-0.220734
1.95011							-0.20532
2.5502							-0.189396
3.09418							-0.173462
3.64569							-0.157764
4.19514							-0.141668
4.74186							-0.124357
5.34194							-0.106582
5.8825							-0.088751
6.43127							-0.07112
6.97867							-0.053205
7.58218							-0.034823
8.13163							-0.016189
8.67904							0.001994
9.2237							0.020286
9.76699							0.039041
10.3746							0.05838
10.9179							0.077534
11.466							0.096858
12.0134							0.116208
12.6155							0.135716
13.1609							0.154743
13.7103							0.173057
14.2557							0.191477
14.7969							0.210444
15.4039							0.229838
15.9499							0.248973
16.4987							0.268087
17.0454							0.287098
17.6509							0.306361
18.1949							0.325505
18.7437							0.344095
19.2897							0.362327
19.8351							0.380999
20.4338							0.399671
20.986							0.418387
21.5279							0.437309
22.0726							0.456104
22.6781							0.475532
23.2242							0.49437
23.7716							0.512939
24.319							0.531678
24.9225							0.550525
25.4692							0.569354
26.0166							0.587573
26.564							0.605641
27.1059							0.624804
27.7128							0.644132
28.2589							0.663095
28.8042							0.681911
29.3468							0.700503
29.9517							0.719633
30.5005							0.738709
31.041							0.756796
31.5884							0.774917
32.1399							0.793706
32.7387							0.813022
33.2874							0.831509
33.8335							0.853009
34.3802							0.872462
34.9878							0.88456
34.3822							0.886162
33.8307							0.879354
33.2847							0.869961
32.7414							0.863346
32.1358							0.855678
31.5939							0.847986
31.0397							0.840621
30.4936							0.832946
29.9469							0.824925
29.3461							0.817003
28.8042							0.809022
28.2507							0.800518
27.7149							0.791918
27.1086							0.782851
26.5599							0.77449
26.0193							0.766734
25.4671							0.758654
24.9197							0.750226
24.3217							0.741377
23.7743							0.732721
23.2221							0.724025
22.6781							0.714793
22.0746							0.705428
21.532							0.696362
20.9825							0.687342
20.4338							0.678499
19.8371							0.668989
19.2877							0.659551
18.7437							0.650272
18.1929							0.640949
17.6496							0.631233
17.0413							0.62103
16.4939							0.610873
15.9499							0.60092
15.3991							0.590888
14.8031							0.580946
14.2577							0.570641
13.7124							0.560475
13.1561							0.550066
12.6169							0.539144
12.0141							0.527899
11.4687							0.516924
10.9159							0.505889
10.3691							0.494725
9.76699							0.48315
9.22165							0.471551
8.67219							0.46013
8.12821							0.448722
7.58492							0.436884
6.9773							0.424681
6.42922							0.41257
5.88592							0.400097
5.34126							0.387184
4.74049							0.374131
4.18419							0.360894
3.64637							0.347754
3.09829							0.334648
2.5461							0.320887
1.94601							0.306712
1.39724							0.29268
0.852576							0.278265
0.312703							0.263735
-0.243593							0.248832
-0.794415							0.233837
-1.33839							0.218468
-1.88032							0.202806
-2.49341							0.186832
-3.03534							0.170549
-3.58479							0.154327
-4.13082							0.137809
-4.68301							0.120494
-5.27489							0.102725
-5.82776							0.084892
-6.37311							0.066753
-6.92051							0.048369
-7.52265							0.029785
-8.06663							0.011215
-8.61129							-0.006609
-9.15801							-0.024741
-9.70678							-0.043659
-10.3096							-0.063182
-10.8522							-0.082492
-11.4024							-0.101583
-11.945							-0.12066
-12.5526							-0.140375
-13.1041							-0.159542
-13.646							-0.178036
-14.1873							-0.196274
-14.7435							-0.215225
-15.3416							-0.234766
-15.8862							-0.253768
-16.4364							-0.272496
-16.9845							-0.291211
-17.5777							-0.310324
-18.1333							-0.32946
-18.6773							-0.347841
-19.224							-0.366082
-19.7728							-0.384747
-20.3736							-0.403349
-20.9182							-0.421833
-21.4656							-0.440519
-22.0117							-0.459668
-22.6165							-0.47916
-23.1578							-0.497678
-23.7113							-0.516216
-24.2567							-0.534889
-24.8602							-0.553596
-25.411							-0.572127
-25.9584							-0.59008
-26.4976							-0.60821
-27.0518							-0.62731
-27.654							-0.646678
-28.1945							-0.665487
-28.7399							-0.684241
-29.2866							-0.702747
-29.8819							-0.721623
-30.4362							-0.740255
-30.9836							-0.758484
-31.5344							-0.776576
-32.0777							-0.795405
-32.6764							-0.814592
-33.219							-0.832707
-33.7657							-0.853499
-34.3247							-0.872787
-34.9207							-0.884733
-34.3138							-0.886476
-33.7712							-0.880085
-33.2306							-0.871019
-32.6771							-0.864253
-32.077							-0.856341
-31.533							-0.848394
-30.9849							-0.841049
-30.4409							-0.833491
-29.8805							-0.825532
-29.2873							-0.81721
-28.7406							-0.809159
-28.1939							-0.800861
-27.6492							-0.792481
-27.0402							-0.783668
-26.4997							-0.775273
-25.9543							-0.767327
-25.4062							-0.759225
-24.867							-0.750789
-24.2553							-0.74199
-23.7072							-0.733293
-23.1633							-0.724628
-22.62							-0.715574
-22.013							-0.706145
-21.469							-0.696901
-20.9258							-0.687598
-20.3729							-0.678453
-19.7687							-0.669214
-19.224							-0.660042
-18.6807							-0.65114
-18.132							-0.641872
-17.5873							-0.631917
-16.9817							-0.621685
-16.4309							-0.611542
-15.8862							-0.601508
-15.3436							-0.591271
-14.7442							-0.581051
-14.1948							-0.570839
-13.6494							-0.561082
-13.0979							-0.550985
-12.5526							-0.540401
-11.9511							-0.529221
-11.4065							-0.51822
-10.8584							-0.506812
-10.313							-0.495506
-9.70609							-0.483746
-9.16143							-0.472277
-8.61745							-0.461132
-8.07347							-0.450106
-7.52402							-0.438315
-6.91983							-0.425987
-6.37243							-0.413661
-5.82434							-0.401102
-5.27626							-0.388448
-4.67822							-0.375426
-4.12672							-0.362056
-3.58342							-0.349183
-3.03602							-0.336208
-2.48793							-0.322174
-1.88032							-0.309516
-1.34524							-0.29524
-0.793731							-0.275243
0.030107							-0.263225
0.033528							-0.255541
-0.249751								-0.306722
0.302439								-0.290104
0.963425								-0.273552
1.62373								-0.256448
2.21971								-0.238151
2.87317								-0.219423
3.53347								-0.200043
4.1404								-0.180226
4.79318								-0.159879
5.44869								-0.139107
6.10488								-0.118305
6.70292								-0.098134
7.35843								-0.07809
8.01873								-0.057645
8.62019								-0.035866
9.27912								-0.013948
9.93464								0.008506
10.5334								0.031414
11.195								0.053886
11.8546								0.075979
12.4479								0.098066
13.1089								0.119473
13.7562								0.140835
14.3658								0.162319
15.02								0.183995
15.6769								0.206193
16.277								0.228731
16.9297								0.251426
17.59								0.274249
18.2462								0.296573
18.8511								0.318294
19.5046								0.338985
20.1655								0.359491
20.7629								0.380656
21.4191								0.402103
22.0746								0.423631
22.672								0.446107
23.3357								0.46797
23.9905								0.490164
24.5892								0.512274
25.2516								0.533368
25.9119								0.554117
26.5072								0.57484
27.1641								0.59583
27.8209								0.617893
28.4696								0.640079
29.0793								0.662279
29.7286								0.684302
30.3876								0.706296
30.989								0.728613
31.6486								0.750215
32.3076								0.771339
32.9008								0.79259
33.5598								0.813517
34.2194								0.834932
34.8188								0.857043
35.4729								0.879395
36.1387								0.902064
36.7292								0.92498
37.3895								0.947361
38.0409								0.968232
38.6465								0.992011
39.2986								1.01408
39.9596								1.02784
39.3034								1.03016
38.6451								1.02297
38.0498								1.01264
37.3881								1.00572
36.736								0.997931
36.1319								0.989404
35.4729								0.980347
34.8215								0.970636
34.2173								0.960558
33.5632								0.950943
32.9077								0.941404
32.3048								0.932149
31.648								0.923405
30.9945								0.91474
30.3876								0.905643
29.7321								0.896078
29.0718								0.886057
28.4689								0.875661
27.8223								0.864947
27.1661								0.85405
26.5058								0.843413
25.9057								0.833349
25.2495								0.823832
24.5954								0.814178
23.9919								0.803949
23.3357								0.793336
22.6774								0.782489
22.0719								0.770713
21.4164								0.758888
20.7629								0.746894
20.1601								0.735269
19.5066								0.72453
18.8525								0.714077
18.2469								0.703285
17.5914								0.69209
16.9366								0.680096
16.2728								0.667707
15.6803								0.654669
15.0159								0.64168
14.3624								0.628608
13.7623								0.615506
13.1034								0.602927
12.441								0.590576
11.8499								0.577993
11.1943								0.56539
10.5375								0.552205
9.93327								0.538326
9.2716								0.524006
8.61814								0.50947
8.0201								0.494456
7.36527								0.479673
6.70566								0.465335
6.10146								0.45106
5.44869								0.436383
4.7966								0.4214
4.13356								0.405944
3.53689								0.389727
2.88001								0.37323
2.21629								0.356451
1.61894								0.339216
0.963425								0.322391
0.30586								0.305627
-0.24154								0.288548
-0.903895								0.27158
-1.56625								0.254112
-2.1595								0.235708
-2.81295								0.216732
-3.46983								0.196875
-4.07334								0.176521
-4.73365								0.155916
-5.38505								0.135226
-6.04262								0.11467
-6.64407								0.094036
-7.29753								0.073424
-7.95989								0.052756
-8.56203								0.030954
-9.21754								0.008819
-9.86963								-0.013613
-10.4766								-0.036693
-11.13								-0.059155
-11.7903								-0.081094
-12.389								-0.102954
-13.0452								-0.124182
-13.696								-0.145579
-14.3008								-0.167669
-14.957								-0.189472
-15.6139								-0.211496
-16.2133								-0.234026
-16.8743								-0.256599
-17.5319								-0.279117
-18.1826								-0.30095
-18.795								-0.32218
-19.4409								-0.342961
-20.0964								-0.363558
-20.7027								-0.3847
-21.3534								-0.406193
-22.0171								-0.428012
-22.6159								-0.450332
-23.2748								-0.472029
-23.9228								-0.493736
-24.5331								-0.515873
-25.1866								-0.537344
-25.8476								-0.558225
-26.4435								-0.578662
-27.0984								-0.599357
-27.7566								-0.62068
-28.4115								-0.642703
-29.0156								-0.665099
-29.6712								-0.687566
-30.3212								-0.709744
-30.9281								-0.731745
-31.5802								-0.752866
-32.2439								-0.773598
-32.8386								-0.794773
-33.5023								-0.81574
-34.1496								-0.836988
-34.7504								-0.859135
-35.4045								-0.88124
-36.0696								-0.903555
-36.6656								-0.926159
-37.3204								-0.947931
-37.9793								-0.968424
-38.5801								-0.992355
-39.2431								-1.01453
-39.8973								-1.02811
-39.237								-1.03017
-38.5849								-1.0229
-37.9848								-1.01299
-37.3245								-1.00621
-36.6649								-0.998066
-36.071								-0.989154
-35.4141								-0.980133
-34.7572								-0.970633
-34.1557								-0.960456
-33.4968								-0.95055
-32.8392								-0.941102
-32.2412								-0.932125
-31.5823								-0.923586
-30.9302								-0.915111
-30.3287								-0.905924
-29.6725								-0.896304
-29.0095								-0.885939
-28.4108								-0.875173
-27.7532								-0.864251
-27.1011								-0.853732
-26.4435								-0.843719
-25.8414								-0.833765
-25.1866								-0.824298
-24.5338								-0.814688
-23.9303								-0.804364
-23.2679								-0.793838
-22.6193								-0.782912
-22.0137								-0.771247
-21.3514								-0.759848
-20.7006								-0.748079
-20.1019								-0.736297
-19.4478								-0.725301
-18.7861								-0.714494
-18.186								-0.703715
-17.5284								-0.692382
-16.8798								-0.680464
-16.2133								-0.668058
-15.616								-0.655104
-14.9557								-0.642011
-14.3056								-0.629113
-13.6994								-0.616118
-13.0446								-0.60381
-12.3849								-0.59156
-11.7896								-0.57898
-11.13								-0.56613
-10.4711								-0.552797
-9.87442								-0.538776
-9.21207								-0.524465
-8.55997								-0.509975
-7.95852								-0.495124
-7.29959								-0.480581
-6.64613								-0.466291
-6.04672								-0.452126
-5.38779								-0.437832
-4.73022								-0.423085
-4.07334								-0.407587
-3.47394								-0.391179
-2.81843								-0.373957
-2.15676								-0.358475
-1.56078								-0.341284
-0.903895								-0.318074
0.029423								-0.304038
0.033528								-0.295342

## Sheet: Sr5
	Polarisation (μC.cm-2)
Electric Field (kV.cm-1)	5 kV.cm-1	10 kV.cm-1	15 kV.cm-1	20 kV.cm-1	25 kV.cm-1	30 kV.cm-1	35 kV.cm-1	40 kV.cm-1
-0.078284	-0.011767
0.028527	-0.008775
0.14131	-0.006191
0.247458	-0.00377
0.350952	-0.001079
0.457764	0.002027
0.569219	0.005569
0.672714	0.009216
0.778198	0.012474
0.881693	0.015252
0.987841	0.01772
1.09465	0.020204
1.20345	0.023236
1.30429	0.026678
1.41641	0.030357
1.51659	0.033924
1.62473	0.037027
1.73088	0.039692
1.83835	0.042218
1.94583	0.045026
2.04534	0.048299
2.15746	0.05196
2.26295	0.055661
2.36578	0.058984
2.46861	0.061907
2.57608	0.064514
2.68422	0.067119
2.79435	0.070239
2.89917	0.073777
3.00333	0.077559
3.11147	0.081257
3.21828	0.084484
3.3231	0.087354
3.42925	0.090062
3.53341	0.092956
3.6442	0.096257
3.74504	0.099972
3.85384	0.103786
3.95733	0.107284
4.06348	0.110384
4.17361	0.113143
4.27976	0.115857
4.38193	0.119017
4.49139	0.122585
4.59688	0.126433
4.7017	0.130088
4.8105	0.133994
4.91333	0.137059
5.01948	0.13808
4.91267	0.136835
4.81183	0.134201
4.70369	0.131559
4.5982	0.129743
4.49205	0.12741
4.38591	0.124638
4.27312	0.121485
4.17693	0.118264
4.06149	0.115435
3.95866	0.113027
3.85517	0.110887
3.74371	0.108721
3.63955	0.106071
3.53539	0.102973
3.43124	0.099646
3.32642	0.096451
3.21695	0.093687
3.11346	0.091357
3.00399	0.089187
2.89585	0.086739
2.79169	0.083825
2.68488	0.080544
2.57741	0.077158
2.47524	0.074198
2.37042	0.071613
2.25963	0.069271
2.15481	0.066982
2.05198	0.06425
1.94251	0.061049
1.83902	0.057636
1.72889	0.054255
1.62738	0.051351
1.51991	0.048881
1.41973	0.046522
1.3023	0.043922
1.20279	0.040951
1.10062	0.03757
0.987177	0.034071
0.883019	0.030897
0.778862	0.028102
0.67006	0.025635
0.565902	0.023253
0.459754	0.020394
0.354269	0.017116
0.247458	0.013573
0.140646	0.010011
0.035825	0.006906
-0.075631	0.004269
-0.181115	0.00181
-0.295224	-0.00085
-0.392748	-0.003969
-0.50155	-0.007517
-0.605044	-0.011165
-0.71849	-0.01446
-0.819331	-0.017387
-0.922162	-0.019964
-1.03229	-0.022476
-1.14043	-0.025429
-1.24459	-0.028789
-1.34941	-0.032428
-1.45954	-0.036091
-1.56436	-0.039291
-1.66918	-0.042071
-1.76936	-0.044629
-1.88214	-0.047321
-1.98298	-0.05051
-2.08979	-0.054133
-2.1966	-0.057866
-2.30076	-0.061309
-2.41089	-0.064367
-2.51372	-0.067083
-2.62186	-0.069737
-2.73066	-0.072785
-2.83681	-0.076233
-2.94296	-0.079998
-3.04977	-0.083771
-3.1599	-0.08708
-3.25543	-0.090001
-3.36158	-0.092741
-3.47303	-0.095573
-3.57454	-0.098866
-3.684	-0.102601
-3.78949	-0.106439
-3.89563	-0.110018
-3.99979	-0.11322
-4.10926	-0.116054
-4.21275	-0.118818
-4.32023	-0.121961
-4.42837	-0.125453
-4.53717	-0.129278
-4.64133	-0.132922
-4.74084	-0.13688
-4.85495	-0.140042
-4.95645	-0.141151
-4.84765	-0.13986
-4.74814	-0.137196
-4.64133	-0.134541
-4.53584	-0.132751
-4.42505	-0.130502
-4.32089	-0.127833
-4.21474	-0.124747
-4.1086	-0.121567
-4.00311	-0.118712
-3.89696	-0.116222
-3.78949	-0.114087
-3.684	-0.111979
-3.57719	-0.109389
-3.47038	-0.10638
-3.37418	-0.10312
-3.26339	-0.099861
-3.15393	-0.097065
-3.04645	-0.094712
-2.94362	-0.092511
-2.83681	-0.090164
-2.72734	-0.087381
-2.6265	-0.084139
-2.51372	-0.080799
-2.41222	-0.077739
-2.30341	-0.075034
-2.1966	-0.072707
-2.08979	-0.070435
-1.98563	-0.067762
-1.87484	-0.064705
-1.774	-0.061343
-1.67449	-0.057954
-1.56038	-0.055035
-1.45423	-0.052539
-1.35007	-0.050221
-1.24459	-0.047765
-1.13976	-0.044825
-1.03229	-0.04145
-0.922825	-0.038005
-0.818004	-0.034834
-0.717163	-0.032019
-0.609688	-0.029528
-0.500886	-0.027079
-0.395402	-0.024268
-0.289254	-0.021622
-0.181779	-0.016957
-0.074967	-0.013872
0.029854	-0.011836
-0.021893		-0.026516
0.084918		-0.022343
0.244141		-0.018306
0.409997		-0.014031
0.565902		-0.009574
0.727114		-0.005139
0.881693		-0.000504
1.04423		0.004448
1.2008		0.00955
1.36268		0.014742
1.51526		0.019799
1.68112		0.024701
1.83769		0.029272
1.99558		0.033726
2.15414		0.038133
2.31735		0.04274
2.46993		0.047493
2.63513		0.052534
2.79236		0.057717
2.95092		0.063017
3.11213		0.068206
3.26803		0.073251
3.42593		0.077972
3.59245		0.08257
3.74504		0.087117
3.90625		0.091813
4.06149		0.096704
4.23		0.101914
4.38524		0.107248
4.54446		0.112657
4.70501		0.11792
4.86755		0.123038
5.01749		0.127891
5.17737		0.132593
5.33726		0.137248
5.49781		0.142083
5.65769		0.14687
5.81161		0.152272
5.97282		0.158203
6.18578		0.164369
6.345		0.170271
6.50422		0.17562
6.66477		0.180402
6.81935		0.185284
6.98521		0.190075
7.14907		0.194972
7.29835		0.200056
7.45956		0.20542
7.61944		0.210952
7.77269		0.216594
7.93789		0.222117
8.09844		0.227447
8.25235		0.232515
8.41489		0.237456
8.57013		0.242332
8.73201		0.247325
8.88659		0.252471
9.04913		0.257935
9.20702		0.263591
9.36691		0.269307
9.52945		0.274615
9.688		0.280895
9.84723		0.286291
10.0018		0.288752
9.84192		0.287375
9.68668		0.283195
9.5248		0.278501
9.36691		0.275136
9.20702		0.271638
9.04846		0.268207
8.88858		0.264684
8.73134		0.260942
8.5688		0.256895
8.41555		0.252604
8.25434		0.248284
8.09512		0.244035
7.93988		0.239962
7.77668		0.236122
7.62011		0.232458
7.46155		0.228833
7.30166		0.225102
7.14178		0.221157
6.97857		0.21693
6.82798		0.212519
6.66809		0.207977
6.50754		0.203734
6.345		0.199374
6.1891		0.194912
5.97348		0.190435
5.81559		0.18615
5.65504		0.182191
5.49316		0.178329
5.33593		0.17392
5.18003		0.169317
5.01948		0.164631
4.8649		0.160017
4.69904		0.155637
4.54314		0.151482
4.38458		0.147505
4.22469		0.143555
4.06282		0.139536
3.90691		0.135308
3.75034		0.130849
3.58648		0.126155
3.42858		0.121376
3.2687		0.116545
3.10948		0.111922
2.94495		0.107573
2.79302		0.103477
2.63314		0.099418
2.47325		0.095293
2.31735		0.090934
2.1495		0.086332
1.9989		0.081481
1.83371		0.076554
1.68178		0.071641
1.51924		0.066947
1.36467		0.062506
1.20014		0.058249
1.04489		0.054025
0.881029		0.049768
0.724461		0.045274
0.561921		0.040572
0.401372		0.035389
0.246794		0.030473
0.088236		0.025886
-0.020566		0.021633
-0.184432		0.017428
-0.341664		0.013138
-0.497569		0.008611
-0.658118		0.004306
-0.816014		-0.000299
-0.981206		-0.005138
-1.14043		-0.010239
-1.29965		-0.015393
-1.45821		-0.020562
-1.61544		-0.025473
-1.76936		-0.030175
-1.93455		-0.034696
-2.09642		-0.039187
-2.24968		-0.043667
-2.40823		-0.048373
-2.5721		-0.05332
-2.73066		-0.058564
-2.88657		-0.063803
-3.04778		-0.069051
-3.20567		-0.074098
-3.35959		-0.078971
-3.52146		-0.083649
-3.68599		-0.088263
-3.84588		-0.092847
-4.00178		-0.09768
-4.15968		-0.102697
-4.3189		-0.108007
-4.48144		-0.113367
-4.64199		-0.118779
-4.79723		-0.123999
-4.95977		-0.128974
-5.11634		-0.133672
-5.27224		-0.138357
-5.43147		-0.143088
-5.58936		-0.147843
-5.75256		-0.153111
-5.91046		-0.159008
-6.12143		-0.165099
-6.27999		-0.17112
-6.43855		-0.176537
-6.60109		-0.181459
-6.75832		-0.186379
-6.91953		-0.191214
-7.08074		-0.195998
-7.24063		-0.201059
-7.39255		-0.206337
-7.55443		-0.211896
-7.71166		-0.217434
-7.87155		-0.223035
-8.03342		-0.228421
-8.19198		-0.23361
-8.34921		-0.238545
-8.50445		-0.243462
-8.66699		-0.248353
-8.8229		-0.253517
-8.98345		-0.25887
-9.14333		-0.264499
-9.30123		-0.270151
-9.46111		-0.275575
-9.62431		-0.28188
-9.78818		-0.287373
-9.93944		-0.289809
-9.78287		-0.288488
-9.62166		-0.284196
-9.45979		-0.279493
-9.30653		-0.276082
-9.14466		-0.272635
-8.98743		-0.269179
-8.82821		-0.2657
-8.665		-0.261916
-8.50976		-0.257978
-8.35253		-0.253735
-8.18534		-0.249441
-8.03342		-0.245086
-7.87221		-0.240985
-7.71232		-0.23707
-7.5604		-0.233394
-7.3972		-0.229706
-7.23797		-0.226119
-7.08008		-0.222219
-6.92086		-0.218084
-6.76097		-0.213636
-6.60175		-0.209126
-6.43523		-0.204812
-6.28065		-0.200447
-6.12143		-0.195901
-5.91179		-0.191486
-5.75588		-0.187233
-5.59135		-0.183343
-5.43412		-0.179425
-5.26826		-0.17507
-5.11169		-0.17049
-4.9611		-0.165883
-4.80121		-0.161204
-4.63867		-0.156812
-4.4821		-0.152597
-4.3189		-0.148611
-4.15702		-0.144564
-4.00377		-0.140616
-3.84455		-0.136406
-3.68533		-0.132016
-3.52611		-0.127296
-3.36755		-0.122523
-3.20567		-0.117666
-3.04512		-0.113103
-2.88723		-0.108674
-2.72933		-0.104519
-2.5721		-0.100421
-2.41155		-0.096377
-2.24901		-0.092051
-2.0878		-0.087493
-1.92792		-0.08262
-1.76737		-0.077734
-1.61876		-0.07274
-1.45622		-0.068027
-1.29899		-0.063488
-1.13844		-0.059254
-0.977226		-0.055039
-0.824638		-0.050855
-0.659445		-0.046299
-0.502877		-0.042028
-0.344981		-0.036958
-0.187086		-0.030302
0.035162		-0.026351
0.030518		-0.024184
-0.076294			-0.052824
0.137993			-0.04612
0.352942			-0.039642
0.622957			-0.032288
0.835253			-0.025004
1.09133			-0.017497
1.30429			-0.010248
1.57099			-0.002542
1.78196			0.004648
2.04799			0.012208
2.2583			0.019392
2.52301			0.026675
2.73663			0.034138
3.00134			0.041922
3.26671			0.04984
3.48298			0.05772
3.74769			0.065356
3.96198			0.072901
4.22204			0.080712
4.4423			0.088168
4.70302			0.095943
4.91996			0.103315
5.1787			0.11105
5.39365			0.118553
5.65637			0.126509
5.86999			0.134149
6.13072			0.142205
6.34301			0.150006
6.60772			0.158083
6.82798			0.165714
7.0887			0.173697
7.29569			0.181335
7.56305			0.189353
7.77734			0.197101
8.03939			0.205265
8.25235			0.213196
8.52237			0.221272
8.72803			0.229641
8.99472			0.238047
9.26142			0.24651
9.47704			0.254774
9.73776			0.2628
9.95337			0.270683
10.2148			0.279113
10.4344			0.287227
10.6964			0.295795
10.9067			0.303973
11.1734			0.312605
11.389			0.320766
11.6544			0.329347
11.866			0.33744
12.1268			0.345932
12.3384			0.354088
12.6031			0.362743
12.8121			0.371026
13.0814			0.379835
13.2931			0.388338
13.5657			0.397327
13.7721			0.405784
14.0315			0.414582
14.2471			0.422487
14.5204			0.432604
14.7247			0.441403
14.9901			0.44643
14.7188			0.44532
14.5191			0.44012
14.2437			0.433319
14.0341			0.428519
13.7681			0.422725
13.5604			0.41727
13.2931			0.411347
13.0814			0.405699
12.8154			0.399628
12.6031			0.394036
12.3391			0.388072
12.1248			0.382469
11.864			0.376458
11.6451			0.370851
11.385			0.364765
11.1781			0.358935
10.9021			0.352621
10.6918			0.346665
10.4297			0.340308
10.2267			0.334406
9.95205			0.328071
9.73842			0.322079
9.46907			0.31601
9.26209			0.309761
8.99539			0.30322
8.73267			0.296674
8.51706			0.290143
8.25301			0.283771
8.04404			0.277346
7.77336			0.270733
7.56504			0.264535
7.29636			0.257998
7.08539			0.251759
6.82532			0.245179
6.61502			0.238858
6.35031			0.232118
6.1347			0.225577
5.86203			0.218668
5.65371			0.212124
5.39033			0.20533
5.1787			0.198841
4.91532			0.191968
4.7017			0.185429
4.43367			0.178628
4.22602			0.172037
3.958			0.165051
3.74968			0.158261
3.48232			0.15135
3.26936			0.144091
3.00134			0.13683
2.73199			0.129588
2.52632			0.122574
2.25963			0.115715
2.04866			0.108931
1.78793			0.101679
1.57232			0.094828
1.31027			0.087487
1.09133			0.080493
0.829282			0.073059
0.615659			0.065869
0.358913			0.058599
0.138656			0.052119
-0.074304			0.045405
-0.287263			0.038955
-0.55396			0.0316
-0.763603			0.024279
-1.03295			0.016711
-1.24857			0.00947
-1.50531			0.001817
-1.7196			-0.005394
-1.9863			-0.012954
-2.19727			-0.020149
-2.46264			-0.027526
-2.67692			-0.03507
-2.94097			-0.042879
-3.21164			-0.050732
-3.41797			-0.058519
-3.684			-0.066132
-3.89563			-0.073761
-4.16167			-0.081562
-4.37463			-0.088995
-4.63867			-0.09676
-4.84765			-0.104156
-5.1097			-0.111938
-5.32996			-0.119461
-5.58604			-0.127405
-5.80099			-0.135065
-6.07565			-0.143141
-6.28596			-0.150867
-6.54536			-0.158892
-6.75832			-0.16654
-7.02966			-0.174568
-7.2393			-0.182267
-7.49737			-0.190282
-7.71299			-0.198015
-7.97703			-0.206202
-8.19132			-0.214162
-8.45271			-0.222254
-8.66699			-0.230635
-8.93236			-0.239018
-9.20039			-0.247415
-9.40804			-0.255613
-9.67474			-0.263666
-9.88703			-0.271644
-10.1557			-0.28007
-10.3601			-0.288148
-10.6287			-0.296694
-10.845			-0.304841
-11.1117			-0.313503
-11.3207			-0.321688
-11.5887			-0.33027
-11.799			-0.338415
-12.0657			-0.346934
-12.2747			-0.355012
-12.5361			-0.363649
-12.7491			-0.371973
-13.0177			-0.380812
-13.232			-0.38928
-13.4954			-0.398167
-13.7031			-0.406595
-13.9711			-0.415442
-14.1834			-0.423367
-14.4487			-0.433501
-14.6644			-0.4423
-14.9291			-0.447275
-14.6617			-0.446126
-14.4501			-0.44087
-14.186			-0.434072
-13.9691			-0.429356
-13.7011			-0.423595
-13.4961			-0.41813
-13.23			-0.412185
-13.0184			-0.406562
-12.7544			-0.400559
-12.5374			-0.394955
-12.2747			-0.388952
-12.0571			-0.38335
-11.8017			-0.377316
-11.5874			-0.37169
-11.326			-0.365604
-11.1097			-0.35981
-10.841			-0.353579
-10.6314			-0.347642
-10.3654			-0.341195
-10.1544			-0.335195
-9.88703			-0.328873
-9.6827			-0.322933
-9.41202			-0.316953
-9.19906			-0.310717
-8.93435			-0.30414
-8.66832			-0.297506
-8.45602			-0.290986
-8.18534			-0.284653
-7.97703			-0.278326
-7.71166			-0.271708
-7.50467			-0.265456
-7.23797			-0.258874
-7.02501			-0.252637
-6.7623			-0.246063
-6.54602			-0.239751
-6.2833			-0.233017
-6.06835			-0.226526
-5.80431			-0.219636
-5.59135			-0.213056
-5.32731			-0.206197
-5.11568			-0.199679
-4.85561			-0.192808
-4.64199			-0.186328
-4.37728			-0.179514
-4.163			-0.172922
-3.8963			-0.165907
-3.68533			-0.15909
-3.41664			-0.152227
-3.20169			-0.145025
-2.94627			-0.137697
-2.67626			-0.13043
-2.4633			-0.123387
-2.19859			-0.116551
-1.98829			-0.109819
-1.71827			-0.10258
-1.50863			-0.095678
-1.24658			-0.088341
-1.03494			-0.081236
-0.768247			-0.074503
-0.55396			-0.067184
-0.289254			-0.05738
0.035825			-0.051768
0.034498			-0.048425
-0.132022				-0.090993
0.190403				-0.08117
0.513491				-0.071291
0.837243				-0.061265
1.14706				-0.051194
1.46617				-0.041019
1.78462				-0.030823
2.10107				-0.020644
2.41487				-0.010591
2.73331				-0.000555
3.05507				0.009523
3.37418				0.019693
3.68865				0.029949
4.01107				0.040342
4.33151				0.050817
4.64862				0.061394
4.97171				0.07198
5.28087				0.082574
5.59998				0.093069
5.92572				0.10355
6.24018				0.114015
6.55663				0.124547
6.87176				0.135144
7.19352				0.145975
7.50998				0.156834
7.82975				0.167811
8.14554				0.178829
8.46929				0.189889
8.77911				0.200815
9.10087				0.211697
9.41733				0.222552
9.74108				0.233584
10.0595				0.244686
10.3727				0.255955
10.6938				0.267335
11.0149				0.278892
11.332				0.290159
11.6511				0.301744
11.9662				0.313641
12.341				0.325782
12.6575				0.337763
12.9733				0.349457
13.2944				0.360849
13.6075				0.37273
13.9306				0.38465
14.2484				0.396659
14.5675				0.408684
14.8833				0.420789
15.1984				0.432802
15.5195				0.444823
15.8393				0.456768
16.1591				0.468812
16.4755				0.480984
16.794				0.493421
17.1137				0.505972
17.4342				0.518633
17.7526				0.531281
18.071				0.543962
18.3868				0.556528
18.7033				0.569167
19.0224				0.581145
19.3389				0.595652
19.654				0.608989
19.9797				0.616583
19.6593				0.616167
19.3422				0.609447
19.0224				0.600911
18.6987				0.594524
18.3855				0.58727
18.0677				0.579865
17.7506				0.57229
17.4269				0.564661
17.1137				0.556997
16.7933				0.549435
16.4742				0.541843
16.1544				0.534276
15.8419				0.526657
15.5155				0.519007
15.2084				0.51114
14.8806				0.503164
14.5648				0.495059
14.2471				0.486965
13.9273				0.47882
13.6161				0.470743
13.2944				0.462613
12.9779				0.454817
12.6582				0.446651
12.3364				0.438028
11.9629				0.429009
11.6464				0.420094
11.328				0.411467
11.0069				0.40312
10.6924				0.394423
10.3727				0.385873
10.0575				0.377317
9.74174				0.368856
9.41799				0.360313
9.10353				0.35178
8.77778				0.343037
8.46863				0.334142
8.14952				0.325102
7.82776				0.316062
7.51131				0.307017
7.19485				0.298128
6.87574				0.289184
6.55929				0.280311
6.24151				0.271394
5.91776				0.262421
5.60197				0.253204
5.28352				0.243909
4.96972				0.23451
4.65194				0.225107
4.32819				0.215631
4.01439				0.206269
3.69462				0.196922
3.37816				0.187689
3.05176				0.17837
2.73928				0.168951
2.41752				0.159367
2.09974				0.149703
1.78528				0.139911
1.46949				0.130088
1.14507				0.120234
0.831936				0.110539
0.513491				0.100825
0.195047				0.091121
-0.124724				0.081358
-0.451129				0.071571
-0.767583				0.061615
-1.08736				0.051552
-1.40248				0.041336
-1.71694				0.031161
-2.03937				0.020934
-2.3545				0.010802
-2.67626				0.000679
-2.99338				-0.009346
-3.31049				-0.019455
-3.63027				-0.029645
-3.95402				-0.040039
-4.27047				-0.050495
-4.58692				-0.061082
-4.90736				-0.071654
-5.21851				-0.082305
-5.53496				-0.092801
-5.85539				-0.103274
-6.17384				-0.113751
-6.49892				-0.124279
-6.8094				-0.13482
-7.13448				-0.14559
-7.44762				-0.156489
-7.76739				-0.167546
-8.08716				-0.178583
-8.4056				-0.189576
-8.72007				-0.200473
-9.0332				-0.21142
-9.3616				-0.222291
-9.67606				-0.233239
-9.99451				-0.244262
-10.3143				-0.255501
-10.6307				-0.266899
-10.9545				-0.278429
-11.2689				-0.289676
-11.5874				-0.301349
-11.8979				-0.313295
-12.276				-0.325424
-12.5912				-0.337346
-12.9136				-0.348928
-13.23				-0.360332
-13.5505				-0.37221
-13.8629				-0.384132
-14.184				-0.396218
-14.5031				-0.408261
-14.8176				-0.420335
-15.1394				-0.432294
-15.4558				-0.444302
-15.7743				-0.456273
-16.0927				-0.468316
-16.4039				-0.480419
-16.7362				-0.492774
-17.0447				-0.505292
-17.3665				-0.517978
-17.6849				-0.530613
-18.0034				-0.543313
-18.3178				-0.555899
-18.6396				-0.568509
-18.9534				-0.580413
-19.2725				-0.594837
-19.6002				-0.608164
-19.9167				-0.615807
-19.5949				-0.61535
-19.2765				-0.608612
-18.9527				-0.600033
-18.6429				-0.5937
-18.3212				-0.586463
-18.0034				-0.579051
-17.6876				-0.571437
-17.3705				-0.563826
-17.0467				-0.556081
-16.7342				-0.54848
-16.4059				-0.540893
-16.0967				-0.53343
-15.7749				-0.525854
-15.4545				-0.518189
-15.1453				-0.51026
-14.8183				-0.502299
-14.5038				-0.494164
-14.1834				-0.485998
-13.8629				-0.477765
-13.5485				-0.469667
-13.232				-0.46156
-12.9123				-0.45377
-12.5852				-0.445623
-12.2734				-0.437085
-11.9005				-0.428165
-11.5834				-0.419241
-11.2683				-0.410502
-10.9498				-0.402041
-10.6294				-0.393347
-10.3149				-0.3848
-9.99915				-0.376268
-9.67805				-0.367832
-9.35828				-0.359335
-9.04116				-0.350803
-8.72007				-0.342046
-8.40759				-0.333139
-8.08583				-0.324036
-7.77004				-0.314938
-7.44695				-0.3058
-7.13382				-0.296842
-6.81006				-0.287946
-6.49693				-0.279126
-6.17185				-0.270189
-5.85738				-0.261227
-5.53894				-0.252007
-5.21652				-0.242713
-4.90802				-0.233244
-4.58493				-0.22376
-4.26914				-0.21428
-3.95468				-0.204959
-3.63358				-0.195615
-3.31315				-0.18636
-2.99006				-0.177013
-2.67626				-0.167704
-2.35317				-0.15816
-2.03738				-0.148422
-1.71628				-0.13853
-1.4058				-0.128498
-1.08536				-0.119567
-0.771564				-0.109587
-0.451129				-0.096105
0.033171				-0.088079
0.036488				-0.083314
-0.130695					-0.141341
0.187749					-0.129583
0.61964					-0.117135
0.995138					-0.104737
1.41243					-0.091518
1.78262					-0.078886
2.21053					-0.065985
2.57741					-0.052879
3.00664					-0.039341
3.43522					-0.025809
3.79811					-0.012349
4.21673					0.000831
4.59887					0.014056
5.01948					0.027601
5.39166					0.04087
5.80962					0.054498
6.18313					0.067935
6.60838					0.081777
6.97791					0.095395
7.41113					0.109405
7.77336					0.123173
8.19994					0.136969
8.5708					0.151185
8.9934					0.165546
9.42396					0.180097
9.79283					0.194541
10.2168					0.208907
10.5876					0.223129
11.0115					0.237872
11.3884					0.252216
11.8063					0.267079
12.1745					0.281471
12.6024					0.296435
12.9726					0.311066
13.3985					0.326255
13.7701					0.341092
14.1966					0.356185
14.5615					0.371545
14.9861					0.387309
15.414					0.40308
15.7855					0.418782
16.2088					0.434281
16.575					0.449912
17.0069					0.465948
17.3804					0.481679
17.8044					0.497824
18.1692					0.513749
18.5985					0.530111
18.9667					0.546252
19.388					0.562877
19.7661					0.579327
20.1907					0.59585
20.5523					0.612762
20.9822					0.629906
21.4061					0.647255
21.7789					0.664454
22.2002					0.681607
22.5764					0.698616
22.9957					0.716248
23.3665					0.733587
23.7918					0.750664
24.1673					0.770531
24.5912					0.789438
24.9614					0.800147
24.5919					0.800657
24.1606					0.792233
23.7911					0.781879
23.3652					0.773768
22.9957					0.765196
22.5717					0.756082
22.2029					0.747214
21.7736					0.738061
21.4127					0.728699
20.9815					0.718996
20.5569					0.709313
20.1867					0.699635
19.7668					0.690188
19.3926					0.680637
18.966					0.6708
18.5965					0.66124
18.1752					0.651315
17.7997					0.641552
17.3738					0.631427
17.0096					0.621536
16.585					0.611262
16.2148					0.60114
15.7849					0.590957
15.4107					0.580453
14.9881					0.569836
14.5695					0.559126
14.1913					0.548549
13.7634					0.53803
13.4045					0.527629
12.9753					0.516742
12.6044					0.506138
12.1805					0.495079
11.8163					0.484455
11.3831					0.473318
11.0135					0.462593
10.5863					0.451391
10.2154					0.440499
9.79083					0.429361
9.41932					0.418014
8.99472					0.406367
8.57279					0.394739
8.20525					0.383129
7.78198					0.371759
7.40582					0.360332
6.98189					0.348634
6.60772					0.337257
6.1818					0.325473
5.81492					0.31392
5.39431					0.302
5.02545					0.290295
4.59489					0.278127
4.22602					0.266218
3.79612					0.254303
3.43256					0.242036
3.00598					0.229567
2.57807					0.216981
2.20921					0.204614
1.78196					0.192364
1.41442					0.180251
0.98386					0.167376
0.615659					0.155126
0.194384					0.14274
-0.124061					0.130941
-0.557941					0.118457
-0.924152					0.106101
-1.34808					0.09301
-1.71894					0.080449
-2.1422					0.067536
-2.5177					0.054403
-2.93566					0.040968
-3.36888					0.02747
-3.73774					0.013989
-4.16366					0.000755
-4.52788					-0.012456
-4.95579					-0.025963
-5.33129					-0.039189
-5.75588					-0.052862
-6.12474					-0.066253
-6.55133					-0.080022
-6.91422					-0.093555
-7.34346					-0.107591
-7.71232					-0.121371
-8.14222					-0.1352
-8.50313					-0.149372
-8.93502					-0.163738
-9.35695					-0.178188
-9.73511					-0.192498
-10.1524					-0.206769
-10.5252					-0.220985
-10.9505					-0.23571
-11.3194					-0.250076
-11.7473					-0.264948
-12.1135					-0.27939
-12.5394					-0.294372
-12.9109					-0.30893
-13.3388					-0.323984
-13.7057					-0.3388
-14.125					-0.353895
-14.4998					-0.369241
-14.9251					-0.384929
-15.3477					-0.400749
-15.7159					-0.416508
-16.1498					-0.432027
-16.522					-0.447554
-16.9412					-0.463534
-17.3114					-0.479197
-17.7433					-0.495335
-18.1075					-0.511162
-18.5341					-0.527531
-18.9063					-0.543666
-19.3309					-0.560315
-19.6978					-0.576668
-20.1257					-0.593157
-20.4899					-0.610026
-20.9191					-0.627164
-21.3437					-0.644407
-21.7186					-0.661583
-22.1385					-0.678707
-22.51					-0.695764
-22.9333					-0.71332
-23.3075					-0.730599
-23.7268					-0.747622
-24.1029					-0.767444
-24.5308					-0.786288
-24.8897					-0.797005
-24.5235					-0.797481
-24.0983					-0.789094
-23.7341					-0.778707
-23.3042					-0.770593
-22.9306					-0.761996
-22.5087					-0.752899
-22.1325					-0.743978
-21.7139					-0.734822
-21.3444					-0.725445
-20.9218					-0.715777
-20.4952					-0.705987
-20.1237					-0.696269
-19.7037					-0.686773
-19.3269					-0.677269
-18.901					-0.667394
-18.5335					-0.657823
-18.1089					-0.647882
-17.74					-0.638181
-17.3121					-0.628005
-16.9419					-0.61807
-16.5133					-0.607687
-16.1484					-0.597597
-15.7146					-0.587421
-15.3484					-0.576926
-14.9291					-0.566297
-14.5005					-0.555648
-14.1316					-0.545027
-13.7084					-0.534435
-13.3342					-0.523883
-12.9089					-0.512987
-12.5434					-0.502418
-12.1208					-0.491398
-11.7473					-0.480687
-11.32					-0.469565
-10.9538					-0.45882
-10.5292					-0.447599
-10.1537					-0.436572
-9.72516					-0.425402
-9.35629					-0.414023
-8.9317					-0.402416
-8.50445					-0.390684
-8.14421					-0.379071
-7.71299					-0.3677
-7.34412					-0.356326
-6.91887					-0.344567
-6.55265					-0.333124
-6.1274					-0.321272
-5.75124					-0.309713
-5.32731					-0.297668
-4.95579					-0.285985
-4.5365					-0.273839
-4.16698					-0.261952
-3.73973					-0.249956
-3.36357					-0.237635
-2.9403					-0.225148
-2.51704					-0.21268
-2.14021					-0.200238
-1.71694					-0.18772
-1.35671					-0.176436
-0.923488					-0.163574
-0.556614					-0.14654
0.031181					-0.136278
0.035162					-0.130334
-0.183769						-0.204587
0.247458						-0.189778
0.724461						-0.175147
1.20876						-0.159795
1.67648						-0.143838
2.15348						-0.127701
2.63048						-0.111126
3.1108						-0.09447
3.58648						-0.077717
4.06481						-0.060879
4.54181						-0.044166
5.02346						-0.027981
5.49847						-0.011767
5.97945						0.00482
6.50422						0.022248
6.97924						0.039719
7.45889						0.057165
7.93656						0.074863
8.40958						0.092935
8.88725						0.110792
9.37022						0.128453
9.84258						0.145714
10.3256						0.162886
10.8019						0.180257
11.2776						0.197728
11.7605						0.215942
12.2289						0.234758
12.7106						0.25375
13.1803						0.272586
13.6679						0.291441
14.1383						0.309835
14.6212						0.328198
15.0962						0.346672
15.5713						0.365239
16.0549						0.384284
16.5246						0.403762
17.0069						0.423274
17.4839						0.443748
17.9583						0.464594
18.4983						0.485487
18.9693						0.505905
19.4477						0.525891
19.922						0.545723
20.3957						0.565746
20.8754						0.585929
21.3563						0.606713
21.832						0.627719
22.303						0.649543
22.788						0.671349
23.2683						0.692926
23.736						0.714467
24.2203						0.735734
24.6967						0.757005
25.169						0.778706
25.6467						0.800527
26.1264						0.82288
26.604						0.84578
27.085						0.869122
27.5541						0.892298
28.033						0.915544
28.5127						0.937834
28.9857						0.964331
29.4654						0.988845
29.9444						1.00358
29.468						1.0046
28.9864						0.995142
28.512						0.982817
28.0357						0.97427
27.558						0.964427
27.0883						0.954095
26.6007						0.942978
26.129						0.931638
25.648						0.919897
25.1737						0.90816
24.692						0.896605
24.2144						0.885243
23.7407						0.874107
23.2597						0.863201
22.7827						0.851865
22.305						0.840622
21.828						0.828859
21.361						0.8165
20.8734						0.803876
20.4017						0.791229
19.9247						0.778553
19.4543						0.766539
18.9653						0.7543
18.497						0.741852
17.9609						0.729201
17.4819						0.716425
17.0003						0.703662
16.5259						0.690919
16.0536						0.677587
15.5706						0.664108
15.0956						0.650558
14.6239						0.636992
14.1442						0.62371
13.6646						0.610768
13.1856						0.598144
12.7112						0.585404
12.2342						0.572063
11.7552						0.558281
11.2789						0.544101
10.8012						0.529723
10.3216						0.515294
9.84988						0.501299
9.36558						0.487525
8.88725						0.47413
8.41887						0.460413
7.93656						0.446233
7.46288						0.432063
6.9799						0.417405
6.50422						0.401758
5.97481						0.385963
5.49913						0.370512
5.02147						0.355791
4.54314						0.341608
4.06813						0.327079
3.58847						0.312251
3.10749						0.297382
2.62849						0.282464
2.15348						0.267024
1.67913						0.251093
1.2008						0.234958
0.723797						0.218974
0.250111						0.203985
-0.183769						0.189468
-0.658782						0.174808
-1.14043						0.159451
-1.61411						0.143502
-2.09045						0.12733
-2.56812						0.111016
-3.04844						0.094121
-3.52478						0.07715
-4.00311						0.060337
-4.47879						0.043801
-4.9538						0.027645
-5.43545						0.011417
-5.91179						-0.005412
-6.43987						-0.022548
-6.92152						-0.040036
-7.39919						-0.057875
-7.87221						-0.075754
-8.35253						-0.093616
-8.82821						-0.111584
-9.30123						-0.129128
-9.78287						-0.146548
-10.2559						-0.163878
-10.7389						-0.181006
-11.2119						-0.198577
-11.6915						-0.216589
-12.1646						-0.235132
-12.6436						-0.253987
-13.1272						-0.273063
-13.6016						-0.292127
-14.0792						-0.311006
-14.5609						-0.329255
-15.0326						-0.347636
-15.5096						-0.365871
-15.9846						-0.384865
-16.4649						-0.404538
-16.9392						-0.424165
-17.4189						-0.444333
-17.8919						-0.46482
-18.426						-0.485749
-18.9036						-0.506888
-19.38						-0.52719
-19.857						-0.546565
-20.3313						-0.566283
-20.8117						-0.586404
-21.286						-0.60756
-21.771						-0.628816
-22.24						-0.65012
-22.7177						-0.671727
-23.2013						-0.693485
-23.6783						-0.715265
-24.158						-0.736729
-24.631						-0.757841
-25.1146						-0.779352
-25.5777						-0.80122
-26.0607						-0.823453
-26.543						-0.846321
-27.0154						-0.869563
-27.4957						-0.892763
-27.9687						-0.916159
-28.4437						-0.938399
-28.926						-0.964727
-29.4017						-0.989155
-29.8794						-1.0037
-29.3977						-1.00474
-28.9234						-0.995613
-28.451						-0.983394
-27.9687						-0.974643
-27.4844						-0.964733
-27.016						-0.954131
-26.5423						-0.943203
-26.064						-0.932024
-25.581						-0.920333
-25.108						-0.908795
-24.635						-0.897229
-24.158						-0.885816
-23.675						-0.874777
-23.1973						-0.863641
-22.721						-0.852249
-22.2453						-0.840911
-21.7743						-0.829015
-21.286						-0.816944
-20.8103						-0.804265
-20.338						-0.791342
-19.8543						-0.778675
-19.3813						-0.766641
-18.9036						-0.754519
-18.428						-0.742348
-17.8992						-0.729636
-17.4202						-0.716806
-16.9472						-0.703965
-16.4642						-0.691079
-15.9832						-0.677933
-15.5029						-0.664592
-15.0379						-0.651096
-14.5529						-0.637658
-14.0792						-0.624472
-13.5989						-0.611516
-13.1226						-0.598775
-12.6396						-0.585782
-12.1659						-0.572387
-11.6922						-0.558623
-11.2179						-0.544482
-10.7369						-0.530068
-10.2566						-0.51588
-9.77889						-0.501785
-9.30454						-0.487958
-8.82356						-0.474258
-8.34589						-0.460559
-7.87155						-0.446769
-7.39653						-0.433046
-6.91488						-0.418322
-6.43987						-0.402594
-5.90979						-0.386859
-5.42881						-0.371604
-4.95579						-0.356745
-4.48409						-0.34245
-4.00112						-0.327777
-3.51748						-0.313071
-3.05043						-0.298506
-2.56945						-0.283526
-2.09112						-0.267841
-1.61677						-0.253477
-1.13976						-0.237066
-0.662099						-0.215266
0.031181						-0.20243
0.037815						-0.19473
-0.238833							-0.286407
0.299868							-0.267748
0.829282							-0.249062
1.41907							-0.229601
1.94384							-0.209805
2.52234							-0.190283
3.10616							-0.170316
3.63889							-0.150376
4.22668							-0.130247
4.75742							-0.109848
5.33593							-0.089147
5.86336							-0.069035
6.44916							-0.04862
6.97857							-0.0284
7.56239							-0.007647
8.09379							0.013567
8.67628							0.03501
9.25877							0.056589
9.79415							0.077756
10.3826							0.099092
10.9021							0.120834
11.4978							0.143202
12.0199							0.165105
12.6071							0.187421
13.1305							0.209359
13.7183							0.231697
14.2464							0.254597
14.8262							0.27757
15.412							0.300792
15.9474							0.324005
16.5273							0.347229
17.06							0.370492
17.6458							0.394388
18.1745							0.417929
18.7491							0.442068
19.2838							0.465779
19.8676							0.489981
20.3964							0.514635
20.9855							0.53992
21.566							0.565385
22.0934							0.590727
22.6825							0.615823
23.206							0.641198
23.8011							0.667042
24.3238							0.692578
24.9123							0.718626
25.4357							0.744648
26.0176							0.771322
26.5483							0.798367
27.1348							0.82533
27.7146							0.853031
28.2553							0.880532
28.8272							0.90811
29.3546							0.935842
29.9437							0.964104
30.4798							0.992159
31.0569							1.02107
31.589							1.0497
32.1748							1.07915
32.7036							1.10896
33.2814							1.13787
33.8692							1.17173
34.394							1.20411
34.9791							1.22462
34.3946							1.22841
33.8699							1.21799
33.2801							1.20309
32.7009							1.19217
32.1775							1.18002
31.5883							1.16787
31.055							1.15569
30.4738							1.14281
29.9411							1.13021
29.3559							1.1171
28.8292							1.10435
28.2473							1.0913
27.7153							1.07764
27.1368							1.06365
26.5516							1.04975
26.0242							1.03581
25.4404							1.02217
24.9057							1.00849
24.3205							0.994574
23.7951							0.980751
23.206							0.966028
22.6766							0.9517
22.0947							0.937366
21.5686							0.922572
20.9782							0.907522
20.399							0.892124
19.8709							0.87704
19.2811							0.862418
18.7537							0.847436
18.1779							0.832114
17.6392							0.817133
17.0534							0.801255
16.5253							0.785584
15.9388							0.769845
15.414							0.753902
14.8349							0.737798
14.2457							0.721477
13.7177							0.705137
13.1358							0.689149
12.6011							0.673207
12.014							0.656579
11.4938							0.640152
10.908							0.62346
10.374							0.606951
9.79216							0.589983
9.2654							0.572608
8.67495							0.55516
8.10109							0.538075
7.56372							0.520959
6.98454							0.503458
6.44916							0.48584
5.8753							0.467756
5.33261							0.450306
4.75544							0.432528
4.22801							0.414708
3.64619							0.39654
3.11014							0.378147
2.525							0.359093
1.93787							0.340404
1.41177							0.321561
0.830609							0.30309
0.299868							0.284845
-0.232862							0.266203
-0.76493							0.247209
-1.34808							0.228116
-1.8755							0.20824
-2.46396							0.188521
-3.04247							0.168644
-3.57985							0.148748
-4.163							0.128637
-4.69506							0.108836
-5.27357							0.088409
-5.80365							0.068476
-6.38481							0.047757
-6.91953							0.02694
-7.50202							0.005737
-8.03342							-0.015206
-8.61657							-0.036306
-9.19972							-0.057552
-9.72516							-0.079207
-10.3149							-0.100924
-10.8437							-0.122954
-11.4275							-0.145253
-11.9563							-0.167139
-12.5427							-0.189453
-13.0675							-0.211529
-13.6599							-0.233616
-14.1847							-0.256355
-14.7665							-0.279275
-15.3497							-0.302531
-15.8784							-0.325704
-16.4689							-0.349092
-16.993							-0.372632
-17.5735							-0.396841
-18.1115							-0.420597
-18.686							-0.444722
-19.2208							-0.468366
-19.8052							-0.492419
-20.334							-0.516987
-20.9191							-0.542348
-21.5056							-0.567995
-22.033							-0.593363
-22.6175							-0.618412
-23.1409							-0.643236
-23.7261							-0.669144
-24.2601							-0.695083
-24.846							-0.721542
-25.3774							-0.747746
-25.9525							-0.773754
-26.4826							-0.800446
-27.0631							-0.827856
-27.6509							-0.855531
-28.181							-0.883463
-28.7661							-0.911224
-29.2975							-0.938722
-29.8741							-0.967103
-30.4008							-0.994828
-30.9886							-1.02348
-31.5233							-1.0522
-32.1085							-1.08139
-32.6319							-1.11107
-33.2204							-1.13997
-33.8022							-1.174
-34.329							-1.20637
-34.9181							-1.22656
-34.3303							-1.23017
-33.8022							-1.21956
-33.2197							-1.20455
-32.6359							-1.19379
-32.1038							-1.18183
-31.5207							-1.16952
-30.9986							-1.15718
-30.4088							-1.14413
-29.876							-1.13153
-29.2916							-1.11875
-28.7681							-1.10617
-28.1843							-1.09327
-27.6489							-1.07973
-27.0704							-1.06561
-26.4886							-1.05161
-25.9552							-1.03772
-25.38							-1.02417
-24.8446							-1.01057
-24.2582							-0.996389
-23.7301							-0.982535
-23.1443							-0.968185
-22.6129							-0.953914
-22.0284							-0.939363
-21.5049							-0.92439
-20.9191							-0.909509
-20.3366							-0.894294
-19.8066							-0.879346
-19.2168							-0.864487
-18.6907							-0.849447
-18.1102							-0.834085
-17.5861							-0.819224
-16.9976							-0.80371
-16.4695							-0.788487
-15.8791							-0.772557
-15.3444							-0.756273
-14.7725							-0.740123
-14.1827							-0.724155
-13.6506							-0.708115
-13.0655							-0.692019
-12.5407							-0.675974
-11.9549							-0.65967
-11.4315							-0.643404
-10.8457							-0.626327
-10.3149							-0.609179
-9.73245							-0.592226
-9.19773							-0.575119
-8.61724							-0.55802
-8.03143							-0.541005
-7.50334							-0.523586
-6.91621							-0.506135
-6.38746							-0.488901
-5.80696							-0.470847
-5.27423							-0.4533
-4.69971							-0.435432
-4.15769							-0.4177
-3.57785							-0.399868
-3.0438							-0.381464
-2.46396							-0.362443
-1.87882							-0.345318
-1.35007							-0.326303
-0.76493							-0.300455
0.037815							-0.284752
0.032508							-0.275223
-0.291244								-0.396487
0.347635								-0.373029
0.989168								-0.349387
1.62871								-0.325582
2.25565								-0.301961
2.89851								-0.27844
3.53075								-0.255097
4.17427								-0.231204
4.81514								-0.207017
5.44208								-0.182663
6.08428								-0.158277
6.71519								-0.133344
7.35076								-0.107861
7.99295								-0.082031
8.62453								-0.056677
9.25943								-0.031399
9.90229								-0.005884
10.5339								0.019521
11.1714								0.045437
11.8136								0.072498
12.4976								0.10018
13.1332								0.128203
13.7641								0.155681
14.4076								0.182922
15.0458								0.210379
15.6787								0.237977
16.3196								0.265692
16.9525								0.293764
17.5874								0.321823
18.2243								0.350338
18.8632								0.379053
19.5001								0.408413
20.1343								0.437961
20.7685								0.467672
21.4061								0.497334
22.047								0.527345
22.6772								0.55707
23.3168								0.587475
23.9483								0.618852
24.6449								0.650681
25.2825								0.682999
25.9154								0.715019
26.5496								0.746811
27.1839								0.779356
27.8247								0.812129
28.4603								0.844853
29.0919								0.877462
29.7294								0.910007
30.3657								0.943178
31.0019								0.97699
31.6394								1.01149
32.281								1.04648
32.9145								1.08179
33.5501								1.11749
34.1843								1.15309
34.8186								1.18867
35.4608								1.22459
36.093								1.26175
36.7797								1.29993
37.4165								1.33855
38.0561								1.37563
38.6936								1.41902
39.3219								1.46043
39.9701								1.48746
39.3272								1.49325
38.697								1.48171
38.0567								1.46518
37.4132								1.45327
36.7843								1.4392
36.0917								1.42493
35.4628								1.41066
34.8232								1.3967
34.1837								1.38298
33.5494								1.36851
32.9112								1.35388
32.2723								1.33886
31.6454								1.32301
31.0025								1.30731
30.3657								1.29158
29.7321								1.27612
29.0992								1.26088
28.4583								1.24525
27.8254								1.22923
27.1885								1.2134
26.5543								1.19709
25.9147								1.1806
25.2812								1.16338
24.6423								1.1456
23.9576								1.12765
23.3128								1.11018
22.6752								1.09282
22.0417								1.07583
21.4081								1.05883
20.7679								1.04163
20.1303								1.02382
19.4974								1.00546
18.8619								0.986635
18.2223								0.967946
17.5854								0.949328
16.9585								0.9308
16.311								0.912216
15.6781								0.893882
15.0425								0.875409
14.4056								0.856719
13.7694								0.837693
13.1325								0.817844
12.4976								0.797265
11.8083								0.776483
11.1688								0.755828
10.5345								0.736048
9.90229								0.71646
9.26142								0.696612
8.62851								0.676388
7.99162								0.656193
7.35407								0.635593
6.72249								0.614523
6.07831								0.593251
5.44407								0.571734
4.81382								0.550023
4.17295								0.528417
3.53341								0.506756
2.89917								0.48551
2.2656								0.4641
1.62141								0.441718
0.989168								0.418959
0.351616								0.396007
-0.2866								0.372739
-0.923488								0.349207
-1.56104								0.325389
-2.19262								0.301769
-2.83614								0.278481
-3.47038								0.255246
-4.10727								0.231344
-4.74084								0.207158
-5.38171								0.182794
-6.01594								0.158109
-6.6535								0.132992
-7.28906								0.107391
-7.92595								0.081486
-8.56416								0.056191
-9.20039								0.030959
-9.83263								0.005541
-10.4695								-0.019926
-11.1031								-0.046409
-11.7466								-0.073436
-12.4333								-0.101069
-13.0701								-0.129067
-13.7024								-0.156761
-14.3486								-0.184255
-14.9795								-0.21179
-15.6124								-0.23887
-16.2519								-0.266411
-16.8895								-0.294412
-17.5251								-0.322572
-18.1672								-0.351215
-18.8021								-0.380293
-19.4377								-0.409672
-20.0726								-0.439511
-20.7049								-0.46945
-21.3464								-0.499408
-21.9813								-0.529466
-22.6089								-0.558923
-23.2537								-0.588966
-23.886								-0.619922
-24.5839								-0.652163
-25.2148								-0.684717
-25.851								-0.717014
-26.484								-0.748912
-27.1242								-0.781519
-27.7551								-0.814055
-28.3986								-0.846855
-29.0295								-0.879518
-29.6624								-0.912346
-30.3053								-0.945417
-30.9408								-0.97917
-31.5718								-1.01323
-32.21								-1.04798
-32.8429								-1.08312
-33.4891								-1.11854
-34.116								-1.15411
-34.7602								-1.18971
-35.3924								-1.22572
-36.024								-1.26281
-36.718								-1.30061
-37.3588								-1.33894
-37.9897								-1.37577
-38.6319								-1.41921
-39.2655								-1.46046
-39.8991								-1.4875
-39.2622								-1.49341
-38.6293								-1.48216
-37.9891								-1.46541
-37.3582								-1.45327
-36.7146								-1.43877
-36.0293								-1.42468
-35.3957								-1.41044
-34.7582								-1.39658
-34.1167								-1.38258
-33.4884								-1.36806
-32.8442								-1.35302
-32.2166								-1.33798
-31.5744								-1.32272
-30.9389								-1.30749
-30.3053								-1.29209
-29.6677								-1.27641
-29.0242								-1.26045
-28.3986								-1.24467
-27.7617								-1.22906
-27.1188								-1.21317
-26.4806								-1.19685
-25.8491								-1.18037
-25.2102								-1.1633
-24.5812								-1.14571
-23.8913								-1.1278
-23.2531								-1.11001
-22.6082								-1.09267
-21.9766								-1.07592
-21.3431								-1.05889
-20.7115								-1.04156
-20.0786								-1.02375
-19.4364								-1.0056
-18.7988								-0.987135
-18.1599								-0.968616
-17.5251								-0.949619
-16.8908								-0.930868
-16.2493								-0.912283
-15.6131								-0.894071
-14.9762								-0.875737
-14.3459								-0.857104
-13.7057								-0.838058
-13.0721								-0.818584
-12.4326								-0.798148
-11.7426								-0.777546
-11.1091								-0.756823
-10.4755								-0.736684
-9.83329								-0.71686
-9.1984								-0.697282
-8.56084								-0.677355
-7.92462								-0.657045
-7.28906								-0.636424
-6.65482								-0.615497
-6.01727								-0.594481
-5.37839								-0.572866
-4.74747								-0.550961
-4.10727								-0.529269
-3.47303								-0.507862
-2.8388								-0.486133
-2.19461								-0.466585
-1.56436								-0.444026
-0.926806								-0.412613
0.029191								-0.393398
0.034498								-0.381736

## Sheet: Sr10
	Polarisation (μC.cm-2)
Electric Field (kV.cm-1)	5 kV.cm-1	10 kV.cm-1	15 kV.cm-1	20 kV.cm-1	25 kV.cm-1	30 kV.cm-1	35 kV.cm-1	40 kV.cm-1
-0.094134	-0.05547
0.03568	-0.046308
0.163975	-0.037067
0.277847	-0.027429
0.40766	-0.017557
0.521532	-0.008065
0.644513	0.001866
0.769772	0.011422
0.894271	0.020945
1.01194	0.030812
1.13492	0.040792
1.24803	0.050616
1.37557	0.060584
1.49324	0.070539
1.61622	0.080539
1.73996	0.090467
1.85687	0.100532
1.97909	0.110846
2.10587	0.121363
2.22733	0.131732
2.3412	0.142243
2.45355	0.152708
2.5864	0.163566
2.70635	0.174499
2.82477	0.18534
2.94851	0.195908
3.07605	0.206445
3.19372	0.217028
3.31518	0.228068
3.43588	0.23928
3.55583	0.250171
3.67881	0.261037
3.80027	0.272109
3.92022	0.283426
4.04244	0.294532
4.16694	0.305584
4.28537	0.316621
4.40531	0.328075
4.53285	0.339682
4.64748	0.350652
4.77198	0.362843
4.89724	0.37478
5.02325	0.382513
4.89192	0.383728
4.7735	0.378703
4.65583	0.370827
4.53285	0.36382
4.40835	0.356264
4.28309	0.348739
4.16542	0.341054
4.04699	0.333448
3.92781	0.325852
3.80483	0.31813
3.67426	0.310094
3.55431	0.301996
3.43968	0.293724
3.31139	0.285611
3.19296	0.277359
3.07226	0.26921
2.947	0.260527
2.82553	0.251821
2.71166	0.243382
2.58261	0.235283
2.46646	0.227311
2.34651	0.219184
2.21974	0.210237
2.09827	0.201246
1.98212	0.192233
1.8637	0.183225
1.73844	0.174278
1.61925	0.16519
1.50235	0.155919
1.37481	0.147013
1.25486	0.138216
1.13188	0.12927
1.01346	0.120246
0.88668	0.111039
0.769013	0.101807
0.642236	0.092507
0.524568	0.082986
0.39931	0.073531
0.283161	0.064369
0.157902	0.055013
0.040994	0.045946
-0.085783	0.036504
-0.214079	0.026837
-0.331746	0.017075
-0.444858	0.006971
-0.57619	-0.002844
-0.695376	-0.012286
-0.818357	-0.022229
-0.942097	-0.032363
-1.06432	-0.042726
-1.18351	-0.053024
-1.29889	-0.062991
-1.42415	-0.072892
-1.54562	-0.082613
-1.66708	-0.092516
-1.79765	-0.102598
-1.90849	-0.112869
-2.02995	-0.123328
-2.15065	-0.133713
-2.27591	-0.144138
-2.39434	-0.154486
-2.51732	-0.164846
-2.6403	-0.175434
-2.76328	-0.186163
-2.87943	-0.197
-3.00317	-0.207678
-3.12919	-0.21824
-3.2461	-0.228896
-3.36225	-0.239996
-3.48675	-0.251391
-3.61504	-0.262674
-3.73878	-0.273592
-3.84658	-0.284497
-3.96956	-0.295249
-4.09862	-0.306554
-4.21932	-0.3177
-4.33623	-0.328902
-4.45845	-0.340358
-4.58067	-0.350991
-4.70517	-0.362892
-4.82967	-0.3743
-4.94734	-0.381788
-4.82208	-0.38307
-4.70517	-0.378189
-4.58675	-0.370398
-4.46452	-0.363271
-4.33623	-0.355549
-4.21932	-0.348061
-4.09178	-0.34017
-3.97336	-0.332587
-3.85645	-0.325207
-3.73271	-0.317148
-3.61277	-0.309033
-3.48902	-0.300772
-3.36377	-0.292274
-3.24762	-0.284201
-3.1254	-0.276363
-3.00469	-0.268155
-2.87336	-0.259835
-2.75721	-0.250746
-2.64106	-0.241653
-2.50973	-0.233349
-2.39586	-0.225271
-2.27515	-0.216739
-2.15293	-0.207733
-2.02919	-0.198299
-1.91608	-0.189417
-1.79537	-0.180986
-1.66556	-0.17257
-1.54562	-0.164367
-1.42567	-0.155808
-1.30269	-0.146835
-1.18502	-0.13748
-1.06052	-0.127801
-0.935265	-0.118572
-0.821394	-0.109705
-0.697653	-0.100701
-0.575431	-0.091334
-0.453209	-0.081713
-0.335542	-0.073328
-0.214079	-0.060581
-0.085024	-0.052509
0.034921	-0.047105
-0.033402		-0.22412
0.091097		-0.212647
0.214838		-0.199286
0.406901		-0.184115
0.589855		-0.168654
0.706763		-0.152385
0.891235		-0.137141
1.07191		-0.121869
1.19413		-0.105777
1.36874		-0.091011
1.55169		-0.075258
1.67012		-0.059096
1.85687		-0.04416
1.97909		-0.027697
2.15976		-0.011002
2.34499		0.005293
2.46646		0.022689
2.64865		0.039063
2.82402		0.05587
2.94927		0.072245
3.13299		0.087163
3.25065		0.104066
3.43437		0.121773
3.6158		0.13952
3.73726		0.158829
3.9225		0.176961
4.10773		0.194546
4.22539		0.213268
4.40303		0.230614
4.59206		0.249263
4.70745		0.267356
4.89116		0.28453
5.00883		0.303316
5.19937		0.323334
5.3755		0.342592
5.50379		0.36294
5.68599		0.381546
5.86894		0.40028
5.98737		0.420185
6.17184		0.439384
6.35024		0.459126
6.47246		0.47864
6.65238		0.496717
6.76701		0.516881
6.95148		0.538046
7.1443		0.558404
7.26273		0.579787
7.44189		0.599904
7.62636		0.62068
7.74782		0.641084
7.92926		0.659974
8.05224		0.680608
8.23064		0.702022
8.41207		0.722761
8.53657		0.744836
8.71573		0.766088
8.90551		0.787249
9.02698		0.809458
9.20006		0.830145
9.38226		0.851848
9.50676		0.872317
9.6844		0.895182
9.80206		0.916696
9.99033		0.932072
9.80738		0.935863
9.68591		0.931498
9.50372		0.922982
9.38985		0.915607
9.20158		0.906361
9.02015		0.897388
8.90324		0.886946
8.71725		0.877588
8.52898		0.867985
8.41207		0.857863
8.23064		0.848771
8.04389		0.83896
7.93077		0.828999
7.74478		0.819932
7.62788		0.809273
7.4434		0.798259
7.26045		0.78747
7.13216		0.776252
6.95831		0.765972
6.78447		0.755232
6.64934		0.744887
6.47398		0.735668
6.35555		0.7249
6.16956		0.713421
5.98357		0.702124
5.86742		0.689624
5.67991		0.677989
5.49696		0.666398
5.38157		0.654046
5.19862		0.643128
5.0149		0.631604
4.89951		0.620078
4.71276		0.609444
4.59054		0.597455
4.40835		0.585121
4.22615		0.573352
4.10545		0.560244
3.92098		0.547969
3.74106		0.535596
3.62036		0.522338
3.43664		0.510063
3.25749		0.497369
3.12995		0.484964
2.94927		0.473904
2.82857		0.461066
2.64182		0.447349
2.4619		0.434086
2.34575		0.419684
2.15825		0.406298
1.97909		0.392499
1.85535		0.379012
1.67695		0.367214
1.56156		0.354032
1.37329		0.340133
1.18654		0.326566
1.06584		0.311523
0.883643		0.297165
0.705245		0.282917
0.579986		0.267244
0.400069		0.252581
0.22167		0.2379
0.103244		0.224757
-0.022774		0.213161
-0.144996		0.199631
-0.330228		0.183998
-0.511663		0.168681
-0.640717		0.152601
-0.810766		0.13748
-1.00131		0.122433
-1.12201		0.106296
-1.30801		0.091259
-1.48413		0.075836
-1.60787		0.060044
-1.78475		0.045138
-1.91228		0.028559
-2.09296		0.011346
-2.27743		-0.005208
-2.39965		-0.022769
-2.57957		-0.039461
-2.75873		-0.056638
-2.87867		-0.073503
-3.06315		-0.088461
-3.1884		-0.105456
-3.36604		-0.123491
-3.54976		-0.141562
-3.6697		-0.160671
-3.85341		-0.178583
-4.03561		-0.195869
-4.16238		-0.214614
-4.34154		-0.232266
-4.51918		-0.251153
-4.6452		-0.269545
-4.8198		-0.286597
-4.9443		-0.305157
-5.12878		-0.324598
-5.30945		-0.343179
-5.43395		-0.36297
-5.61463		-0.381883
-5.79682		-0.401087
-5.91601		-0.421421
-6.09744		-0.440127
-6.27736		-0.45964
-6.40186		-0.479238
-6.58557		-0.497537
-6.70552		-0.517226
-6.88543		-0.538056
-7.07066		-0.558419
-7.19592		-0.580019
-7.3728		-0.599943
-7.55576		-0.620212
-7.67267		-0.640244
-7.85334		-0.658869
-7.97556		-0.679081
-8.1608		-0.700178
-8.33464		-0.720817
-8.45762		-0.742927
-8.64665		-0.763896
-8.83264		-0.784801
-8.95562		-0.807215
-9.13174		-0.827916
-9.31317		-0.849232
-9.43464		-0.868828
-9.61455		-0.891095
-9.73981		-0.912324
-9.91973		-0.927366
-9.73298		-0.930739
-9.62215		-0.926183
-9.43464		-0.917649
-9.31166		-0.910505
-9.13478		-0.901039
-8.95258		-0.891904
-8.82884		-0.881358
-8.65044		-0.871961
-8.45762		-0.862573
-8.33919		-0.852405
-8.15928		-0.842985
-7.98316		-0.832984
-7.85942		-0.822966
-7.67418		-0.813993
-7.55804		-0.803341
-7.37432		-0.792251
-7.19213		-0.781516
-7.07066		-0.769879
-6.88847		-0.7594
-6.70628		-0.748483
-6.58633		-0.737982
-6.40338		-0.72893
-6.27508		-0.717992
-6.09441		-0.706477
-5.91753		-0.695444
-5.79758		-0.682983
-5.61235		-0.671425
-5.42864		-0.660026
-5.31401		-0.647571
-5.13029		-0.636469
-4.94658		-0.624818
-4.83043		-0.613459
-4.64292		-0.603284
-4.52298		-0.591409
-4.34078		-0.578787
-4.15404		-0.56669
-4.03333		-0.553289
-3.85797		-0.540785
-3.66515		-0.528514
-3.55355		-0.51553
-3.36301		-0.503888
-3.18992		-0.491425
-3.06618		-0.47864
-2.88475		-0.466994
-2.75797		-0.453586
-2.57426		-0.439791
-2.3951		-0.426347
-2.27288		-0.412204
-2.08992		-0.399109
-1.91304		-0.385813
-1.78778		-0.372538
-1.60787		-0.360802
-1.48868		-0.347317
-1.30497		-0.333391
-1.11974		-0.319416
-0.998274		-0.304152
-0.819875		-0.289411
-0.632367		-0.274719
-0.509385		-0.260521
-0.329468		-0.246522
-0.154106		-0.227267
0.037957		-0.215566
0.031125		-0.209016
-0.033402			-0.538915
0.091097			-0.517917
0.343892			-0.4963
0.590614			-0.4723
0.820634			-0.445688
1.07267			-0.419759
1.31408			-0.393313
1.55169			-0.366395
1.79765			-0.339143
2.0421			-0.311547
2.28199			-0.283708
2.52112			-0.255628
2.76556			-0.227367
3.0138			-0.198545
3.26128			-0.169712
3.49737			-0.140693
3.73802			-0.111199
3.98171			-0.081254
4.2216			-0.049842
4.47363			-0.018835
4.71049			0.010501
4.89116			0.038984
5.13561			0.067994
5.38309			0.098636
5.6207			0.131154
5.86742			0.163666
6.10503			0.196989
6.34492			0.230502
6.59013			0.264243
6.83229			0.298343
7.08357			0.33284
7.32346			0.367821
7.56335			0.402681
7.80703			0.437804
8.05679			0.473568
8.29289			0.509439
8.53354			0.546023
8.77646			0.583072
9.02015			0.621303
9.26687			0.658773
9.49917			0.694665
9.68819			0.729426
9.9296			0.764966
10.1718			0.802293
10.4147			0.841455
10.6523			0.880475
10.899			0.920333
11.1473			0.960641
11.3849			1.00132
11.6263			1.04232
11.8669			1.08362
12.1167			1.12466
12.3589			1.16593
12.6018			1.20751
12.8424			1.24937
13.0892			1.29174
13.3275			1.33456
13.5735			1.37755
13.8111			1.42191
14.054			1.4654
14.2977			1.50555
14.4883			1.55013
14.7206			1.59311
14.9696			1.62301
14.7221			1.63453
14.4913			1.62868
14.2992			1.61674
14.0518			1.60791
13.8119			1.59637
13.5697			1.58336
13.326			1.57041
13.0869			1.55669
12.8462			1.54275
12.6033			1.5282
12.3498			1.51364
12.1091			1.49913
11.8685			1.48448
11.627			1.46961
11.3834			1.45467
11.1389			1.43906
10.899			1.4237
10.6561			1.4081
10.4132			1.39217
10.1794			1.37555
9.9258			1.35948
9.68819			1.34414
9.50903			1.32966
9.26383			1.31473
9.01407			1.29889
8.78177			1.28188
8.53354			1.26494
8.29137			1.24725
8.05452			1.22963
7.80931			1.21175
7.56639			1.19394
7.31815			1.17564
7.07674			1.15728
6.83002			1.13895
6.59164			1.12081
6.35327			1.10256
6.10352			1.08399
5.86439			1.0647
5.62222			1.04526
5.37929			1.02472
5.13713			1.00474
4.89648			0.985783
4.70897			0.967385
4.46756			0.948856
4.22312			0.928934
3.98702			0.907698
3.73878			0.886674
3.49965			0.865307
3.25521			0.843314
3.00773			0.821113
2.76784			0.79865
2.52795			0.77612
2.27895			0.753631
2.0383			0.731127
1.79537			0.70807
1.55473			0.684707
1.3118			0.660786
1.06432			0.636686
0.827467			0.612801
0.580745			0.587041
0.342374			0.562348
0.101725			0.53976
-0.032643			0.518693
-0.270255			0.497086
-0.518495			0.472876
-0.750793			0.446141
-0.999792			0.420278
-1.23968			0.393403
-1.48413			0.366258
-1.73085			0.338711
-1.96239			0.311153
-2.20835			0.283315
-2.45735			0.254992
-2.70027			0.226625
-2.94548			0.198103
-3.18764			0.169078
-3.42753			0.139638
-3.66818			0.10946
-3.91566			0.079006
-4.16087			0.047691
-4.3962			0.01693
-4.64444			-0.01258
-4.82891			-0.04136
-5.06197			-0.070416
-5.30945			-0.10123
-5.55466			-0.133767
-5.79834			-0.165958
-6.03292			-0.198926
-6.27584			-0.232048
-6.51573			-0.265787
-6.76169			-0.300123
-7.01145			-0.334851
-7.25286			-0.369692
-7.49199			-0.4045
-7.73795			-0.439417
-7.97329			-0.475092
-8.22532			-0.511274
-8.46066			-0.548014
-8.71041			-0.584881
-8.95182			-0.622768
-9.19627			-0.660202
-9.4354			-0.696174
-9.61683			-0.731232
-9.85824			-0.766541
-10.105			-0.803888
-10.3388			-0.842836
-10.5946			-0.881645
-10.8353			-0.920956
-11.0721			-0.960781
-11.315			-1.00115
-11.5618			-1.04222
-11.8016			-1.08322
-12.0484			-1.12441
-12.2852			-1.16523
-12.5266			-1.20636
-12.7718			-1.248
-13.0201			-1.29002
-13.2607			-1.33235
-13.5044			-1.37521
-13.7443			-1.41893
-13.9895			-1.46194
-14.2286			-1.50157
-14.4123			-1.54563
-14.6591			-1.58798
-14.8974			-1.6176
-14.65			-1.62852
-14.4131			-1.62242
-14.2301			-1.61056
-13.9849			-1.60222
-13.7466			-1.59094
-13.5044			-1.57767
-13.2615			-1.56434
-13.0208			-1.55055
-12.7749			-1.53647
-12.5304			-1.52221
-12.2905			-1.50766
-12.0446			-1.49282
-11.7963			-1.47796
-11.558			-1.46289
-11.3181			-1.44812
-11.0751			-1.433
-10.8292			-1.4177
-10.5885			-1.402
-10.3456			-1.38616
-10.1012			-1.36983
-9.85976			-1.3542
-9.62139			-1.33886
-9.42705			-1.32401
-9.18868			-1.30883
-8.94803			-1.29262
-8.70814			-1.27545
-8.45762			-1.25873
-8.22077			-1.24132
-7.97708			-1.22389
-7.73112			-1.20613
-7.49578			-1.18815
-7.25286			-1.17001
-7.00842			-1.15197
-6.76473			-1.1338
-6.51953			-1.11566
-6.28191			-1.097
-6.03519			-1.07811
-5.80214			-1.0589
-5.55314			-1.03953
-5.31021			-1.01926
-5.06577			-0.999575
-4.8274			-0.980687
-4.63913			-0.962288
-4.3962			-0.94352
-4.15327			-0.923323
-3.91642			-0.902147
-3.67198			-0.88143
-3.42905			-0.860247
-3.18385			-0.838674
-2.94548			-0.816751
-2.68965			-0.794109
-2.45355			-0.771229
-2.21215			-0.748651
-1.96922			-0.726286
-1.73388			-0.70334
-1.4864			-0.680181
-1.245			-0.656476
-1.00131			-0.632432
-0.764458			-0.609611
-0.515459			-0.585464
-0.275569			-0.552101
0.034921			-0.532275
0.036439			-0.520185
-0.089579				-0.984086
0.156384				-0.951013
0.465355				-0.917481
0.829744				-0.88113
1.12505				-0.84407
1.43175				-0.807271
1.73616				-0.769158
2.10283				-0.729761
2.40649				-0.689805
2.70635				-0.648535
3.07529				-0.60733
3.36604				-0.566297
3.67805				-0.525833
3.98626				-0.485096
4.34989				-0.441853
4.6452				-0.398551
4.95569				-0.3554
5.26087				-0.310959
5.62601				-0.264145
5.92891				-0.217623
6.22574				-0.171178
6.53319				-0.124615
6.89682				-0.077379
7.20124				-0.028563
7.50262				0.021084
7.86852				0.071412
8.1699				0.121383
8.46977				0.17189
8.77646				0.223246
9.14465				0.277035
9.44679				0.329701
9.74513				0.382198
10.0511				0.435052
10.4094				0.490704
10.7161				0.545651
11.0228				0.601022
11.3264				0.657479
11.6863				0.715423
11.9922				0.774933
12.2974				0.83497
12.6602				0.895531
12.9662				0.954994
13.266				1.0135
13.5598				1.07304
13.9333				1.135
14.2438				1.19639
14.5414				1.25815
14.8466				1.32059
15.2117				1.386
15.5101				1.45134
15.8137				1.51646
16.1212				1.58319
16.478				1.65018
16.7892				1.7181
17.0853				1.7866
17.4649				1.85665
17.7533				1.92665
18.0631				1.9966
18.3614				2.06603
18.725				2.13782
19.0363				2.20709
19.3361				2.2847
19.6398				2.35799
20.0065				2.41176
19.6375				2.43436
19.3331				2.43105
19.0295				2.41645
18.7288				2.4061
18.3599				2.39161
18.0615				2.37666
17.7564				2.36101
17.458				2.34456
17.0906				2.32722
16.7816				2.30906
16.4803				2.2906
16.1181				2.27245
15.8152				2.25474
15.5177				2.23729
15.2079				2.21899
14.8473				2.19934
14.5437				2.18026
14.2393				2.16131
13.9326				2.14159
13.578				2.12068
13.2683				2.10037
12.9692				2.08062
12.6595				2.06025
12.2989				2.03953
11.9937				2.01824
11.687				1.99674
11.3279				1.97484
11.022				1.95275
10.7191				1.93027
10.4155				1.9076
10.048				1.88344
9.74513				1.86031
9.44754				1.8373
9.14009				1.81409
8.77115				1.78952
8.46901				1.76545
8.16839				1.741
7.86473				1.7162
7.50262				1.68976
7.19972				1.66261
6.89758				1.6354
6.52636				1.6085
6.22726				1.58174
5.92436				1.55518
5.61918				1.52784
5.26011				1.49907
4.95417				1.47042
4.64748				1.44162
4.34306				1.41184
3.98626				1.38081
3.67653				1.3503
3.37819				1.31999
3.06922				1.28956
2.70711				1.25881
2.40117				1.22597
2.10055				1.19259
1.73996				1.15834
1.4363				1.12453
1.12885				1.09131
0.822912				1.05647
0.466873				1.02039
0.161698				0.986886
-0.090338				0.953992
-0.392477				0.920683
-0.757625				0.883835
-1.05749				0.845832
-1.3619				0.80853
-1.67088				0.770068
-2.02843				0.730928
-2.33513				0.691283
-2.63802				0.649965
-2.99938				0.608388
-3.30759				0.566948
-3.61352				0.525689
-3.91718				0.484535
-4.27702				0.4414
-4.57991				0.398622
-4.88357				0.355316
-5.19254				0.310415
-5.5539				0.263514
-5.853				0.217363
-6.15666				0.171723
-6.46259				0.125211
-6.82242				0.077227
-7.13064				0.02809
-7.42594				-0.021619
-7.79337				-0.071605
-8.10158				-0.120588
-8.40296				-0.170106
-8.70662				-0.221486
-9.06949				-0.276032
-9.37618				-0.329115
-9.67908				-0.381875
-9.97667				-0.434613
-10.3486				-0.490544
-10.647				-0.545926
-10.9529				-0.601753
-11.2543				-0.658588
-11.6233				-0.716643
-11.9246				-0.775281
-12.2298				-0.83492
-12.5942				-0.895062
-12.8963				-0.955623
-13.2				-1.01554
-13.5044				-1.07589
-13.868				-1.13843
-14.1618				-1.20083
-14.4746				-1.26316
-14.7798				-1.32612
-15.1373				-1.39197
-15.4402				-1.45719
-15.7424				-1.52165
-16.0506				-1.58708
-16.4127				-1.65251
-16.7163				-1.72062
-17.017				-1.79032
-17.3867				-1.85997
-17.6812				-1.9287
-17.9917				-1.99706
-18.2885				-2.0661
-18.6567				-2.13833
-18.9657				-2.20628
-19.2663				-2.28191
-19.5768				-2.35362
-19.9336				-2.4066
-19.5707				-2.42952
-19.2724				-2.42603
-18.9604				-2.41084
-18.6613				-2.40048
-18.2946				-2.38577
-17.9864				-2.37102
-17.6858				-2.35548
-17.3867				-2.33912
-17.0246				-2.32166
-16.7232				-2.3034
-16.4112				-2.28481
-16.0498				-2.26655
-15.7439				-2.24876
-15.4509				-2.23153
-15.1442				-2.21354
-14.779				-2.19407
-14.4708				-2.17512
-14.1656				-2.15621
-13.8612				-2.1366
-13.5059				-2.11564
-13.1985				-2.09553
-12.8956				-2.07544
-12.5874				-2.05484
-12.2245				-2.03428
-11.9254				-2.01287
-11.6202				-1.99106
-11.252				-1.96905
-10.9544				-1.94688
-10.6462				-1.92479
-10.3456				-1.90249
-9.98046				-1.87816
-9.67984				-1.85507
-9.3777				-1.83203
-9.07253				-1.80889
-8.70358				-1.78402
-8.41055				-1.76005
-8.10234				-1.73561
-7.79413				-1.71071
-7.43581				-1.68452
-7.1314				-1.65789
-6.82091				-1.63032
-6.46259				-1.6032
-6.15286				-1.57604
-5.85907				-1.54936
-5.54782				-1.52198
-5.18951				-1.49319
-4.88889				-1.46483
-4.58219				-1.43647
-4.27853				-1.40686
-3.91794				-1.37578
-3.60669				-1.34512
-3.30607				-1.31461
-3.00469				-1.28373
-2.63954				-1.25238
-2.32678				-1.21989
-2.03071				-1.18676
-1.67088				-1.15309
-1.36494				-1.11927
-1.05901				-1.08783
-0.758385				-1.05477
-0.3902				-1.00572
0.032643				-0.97573
0.031884				-0.957213
-0.146515					-1.84186
0.217115					-1.79686
0.583782					-1.74882
1.02484					-1.69809
1.43326					-1.64466
1.79689					-1.59112
2.21594					-1.53765
2.5902					-1.48394
3.00925					-1.42988
3.37819					-1.37416
3.79496					-1.317
4.21932					-1.25818
4.58599					-1.19846
5.01718					-1.13947
5.37929					-1.07773
5.80441					-1.0139
6.22194					-0.949358
6.59089					-0.884361
7.01449					-0.819314
7.38647					-0.75411
7.80855					-0.687921
8.17674					-0.619279
8.59654					-0.548132
9.02091					-0.475276
9.38378					-0.401564
9.81345					-0.328765
10.1733					-0.252895
10.5923					-0.175668
11.0182					-0.096702
11.3864					-0.016867
11.8176					0.063455
12.1797					0.144025
12.6025					0.22575
12.9639					0.310484
13.3943					0.398558
13.8103					0.488762
14.1755					0.580283
14.6029					0.669854
14.9718					0.763474
15.3932					0.859494
15.8137					0.957684
16.1811					1.05769
16.6055					1.15905
16.9623					1.26201
17.3996					1.36776
17.764					1.4775
18.1815					1.59167
18.6119					1.70933
18.9733					1.82901
19.4007					1.94705
19.7605					2.06868
20.1864					2.19348
20.6092					2.31892
20.9721					2.44344
21.4048					2.56502
21.7647					2.68476
22.1837					2.80264
22.5564					2.9207
22.977					3.0402
23.3991					3.16155
23.765					3.27869
24.1947					3.4076
24.5515					3.5332
24.9819					3.63001
24.5492					3.67741
24.1947					3.68144
23.765					3.66441
23.3998					3.65295
22.9854					3.63646
22.5519					3.61813
22.1905					3.59871
21.7669					3.57935
21.3987					3.5598
20.9713					3.53994
20.6108					3.51982
20.1879					3.49914
19.7552					3.47782
19.3954					3.456
18.9657					3.43412
18.6134					3.41075
18.1815					3.38674
17.7586					3.36303
17.3996					3.33969
16.9722					3.31629
16.601					3.29253
16.1804					3.26894
15.8152					3.24433
15.3871					3.21896
14.9627					3.1922
14.6006					3.16521
14.1762					3.13869
13.8096					3.11067
13.3875					3.08237
12.97					3.05394
12.5965					3.02603
12.1797					2.9981
11.8168					2.96913
11.3879					2.93942
11.022					2.90862
10.6022					2.87653
10.1687					2.84401
9.8013					2.81077
9.38378					2.77883
9.01787					2.74548
8.59199					2.71155
8.17142					2.67708
7.80779					2.64231
7.37964					2.60702
7.01677					2.57135
6.59696					2.53482
6.22802					2.49679
5.80745					2.45782
5.37702					2.41807
5.01718					2.37799
4.58826					2.33941
4.2345					2.29904
3.79875					2.25745
3.37667					2.21454
3.00925					2.17127
2.58944					2.12796
2.22126					2.08398
1.79462					2.03869
1.43326					1.99239
0.999792					1.94428
0.589855					1.89684
0.222429					1.85046
-0.148033					1.80553
-0.516977					1.75744
-0.93982					1.70673
-1.36342					1.65361
-1.73237					1.60063
-2.14838					1.54748
-2.51504					1.49401
-2.94092					1.44037
-3.30455					1.38515
-3.72967					1.32855
-4.15176					1.26984
-4.52222					1.21023
-4.94278					1.15203
-5.31477					1.09103
-5.73761					1.02768
-6.15362					0.96314
-6.52256					0.898333
-6.95148					0.834234
-7.31131					0.770107
-7.73492					0.705094
-8.10158					0.637654
-8.51835					0.567648
-8.94803					0.49577
-9.32077					0.422865
-9.73602					0.351043
-10.0996					0.276141
-10.5286					0.199466
-10.9476					0.121385
-11.3135					0.042968
-11.744					-0.035157
-12.1008					-0.114408
-12.5304					-0.19528
-12.9024					-0.27896
-13.3215					-0.365471
-13.7413					-0.454307
-14.1079					-0.54417
-14.5315					-0.632586
-14.8952					-0.724097
-15.3195					-0.818302
-15.7446					-0.914541
-16.1136					-1.01266
-16.5334					-1.11189
-16.9061					-1.21306
-17.3221					-1.31629
-17.6835					-1.42377
-18.1132					-1.53457
-18.5398					-1.6486
-18.905					-1.76465
-19.3301					-1.88013
-19.6869					-1.9994
-20.1203					-2.12299
-20.5379					-2.24947
-20.9068					-2.37724
-21.3327					-2.50432
-21.6941					-2.63008
-22.1214					-2.75391
-22.4828					-2.87868
-22.9102					-3.00445
-23.3361					-3.13109
-23.6952					-3.25258
-24.1218					-3.38526
-24.4907					-3.51389
-24.9098					-3.61233
-24.4877					-3.66035
-24.1226					-3.66505
-23.6944					-3.64798
-23.3315					-3.63697
-22.9117					-3.62043
-22.4752					-3.6021
-22.1214					-3.58287
-21.691					-3.56379
-21.3342					-3.5442
-20.9061					-3.52448
-20.5379					-3.50432
-20.1173					-3.48364
-19.6945					-3.46201
-19.3293					-3.4401
-18.9065					-3.41837
-18.5368					-3.39509
-18.1086					-3.37131
-17.6843					-3.34738
-17.3275					-3.32355
-16.8985					-3.30026
-16.5334					-3.27667
-16.1075					-3.25292
-15.7401					-3.22838
-15.3188					-3.20267
-14.8982					-3.17583
-14.5338					-3.14867
-14.1087					-3.12222
-13.7481					-3.09436
-13.3237					-3.06599
-12.8971					-3.03745
-12.538					-3.00913
-12.1083					-2.9813
-11.7371					-2.9526
-11.3166					-2.92299
-10.9537					-2.89191
-10.5202					-2.85989
-10.1042					-2.82681
-9.73906					-2.79386
-9.31697					-2.76209
-8.95031					-2.72861
-8.52367					-2.69441
-8.10006					-2.65986
-7.73492					-2.62465
-7.31359					-2.58957
-6.94616					-2.55347
-6.52029					-2.51645
-6.16349					-2.47813
-5.73381					-2.43919
-5.30869					-2.39958
-4.9481					-2.35978
-4.51994					-2.32083
-4.15859					-2.28017
-3.72967					-2.23808
-3.30455					-2.19506
-2.94092					-2.15152
-2.51808					-2.10775
-2.14989					-2.06309
-1.72857					-2.01714
-1.36494					-1.97414
-0.937543					-1.92775
-0.516218					-1.86178
0.034161					-1.82053
0.036439					-1.79521
-0.151829						-4.84753
0.214838						-4.78326
0.705245						-4.71793
1.19565						-4.64647
1.67771						-4.57042
2.16432						-4.49307
2.64713						-4.41408
3.13374						-4.33634
3.61352						-4.25434
4.10621						-4.17017
4.5913						-4.08526
5.0149						-3.99891
5.5						-3.91179
5.98433						-3.82286
6.47246						-3.72757
6.953						-3.62921
7.44037						-3.52716
7.93153						-3.42298
8.41131						-3.31523
8.90324						-3.20538
9.38681						-3.09358
9.80814						-2.98012
10.291						-2.86237
10.7814						-2.7393
11.2619						-2.60903
11.7515						-2.47367
12.2374						-2.33256
12.7179						-2.18611
13.203						-2.03057
13.6957						-1.87066
14.1785						-1.70464
14.6036						-1.53211
15.091						-1.35001
15.5731						-1.1532
16.0642						-0.939766
16.5501						-0.714287
17.0344						-0.474187
17.515						-0.221695
17.9963						0.047622
18.4844						0.329722
18.9695						0.61643
19.4022						0.905455
19.8774						1.19855
20.358						1.50287
20.8522						1.8191
21.3395						2.14265
21.8254						2.47044
22.3052						2.80022
22.7925						3.13435
23.2829						3.46646
23.7711						3.79209
24.1947						4.10856
24.6707						4.41414
25.1618						4.709
25.6408						4.99124
26.1328						5.25177
26.6141						5.49451
27.1083						5.7222
27.585						5.94231
28.0731						6.1572
28.5643						6.35802
28.9871						6.57302
29.4646						6.78313
29.9573						6.9486
29.4715						7.04412
28.9887						7.06848
28.5643						7.05697
28.0777						7.05067
27.5926						7.03535
27.1083						7.01829
26.6179						7.00125
26.1343						6.98336
25.6454						6.96484
25.1603						6.94313
24.6752						6.9211
24.1878						6.89804
23.768						6.87585
23.2791						6.85296
22.7948						6.82942
22.3097						6.80579
21.8284						6.78199
21.3373						6.7572
20.8598						6.73242
20.3701						6.70426
19.885						6.67645
19.3923						6.64872
18.9687						6.62175
18.4882						6.59458
17.9955						6.56681
17.515						6.53588
17.0299						6.50683
16.541						6.47592
16.0597						6.4443
15.5814						6.41195
15.0948						6.3799
14.6044						6.34547
14.177						6.31308
13.6972						6.27904
13.2091						6.24322
12.7263						6.20703
12.2366						6.16919
11.7531						6.12992
11.2589						6.0936
10.7776						6.05335
10.2947						6.01167
9.8051						5.97183
9.38226						5.93005
8.89337						5.88924
8.40828						5.84573
7.92698						5.79845
7.44568						5.75332
6.95831						5.70768
6.4717						5.6597
5.98281						5.61079
5.50455						5.56052
5.02022						5.51134
4.58599						5.46235
4.10773						5.41104
3.61277						5.35677
3.13223						5.3009
2.63954						5.24408
2.16356						5.18578
1.67619						5.12712
1.18806						5.06472
0.706004						5.00253
0.217874						4.9427
-0.154106						4.88325
-0.632367						4.82126
-1.11974						4.75602
-1.6109						4.68729
-2.08689						4.61874
-2.57957						4.54964
-3.0639						4.47796
-3.54596						4.40197
-4.03561						4.32593
-4.51918						4.24959
-4.94658						4.17236
-5.42712						4.09321
-5.91677						4.00973
-6.40641						3.92318
-6.88923						3.8343
-7.3728						3.74373
-7.85486						3.65342
-8.33768						3.55809
-8.83112						3.46056
-9.31697						3.3631
-9.73298						3.26367
-10.2181						3.16373
-10.7115						3.05753
-11.1943						2.9423
-11.6741						2.82642
-12.1638						2.70788
-12.6557						2.58592
-13.1408						2.45869
-13.6274						2.32636
-14.1087						2.18948
-14.5353						2.05114
-15.0212						1.90627
-15.5055						1.75017
-15.9853						1.5808
-16.4749						1.39862
-16.9631						1.20528
-17.4482						1.00061
-17.9264						0.781089
-18.4191						0.54937
-18.9088						0.310673
-19.3286						0.063201
-19.8152						-0.193807
-20.298						-0.465523
-20.7854						-0.752032
-21.2712						-1.04914
-21.7525						-1.35936
-22.2422						-1.68383
-22.7189						-2.02345
-23.2116						-2.37006
-23.6952						-2.71698
-24.1286						-3.06533
-24.6076						-3.42383
-25.0912						-3.79072
-25.571						-4.16403
-26.066						-4.52936
-26.5465						-4.88332
-27.0286						-5.22023
-27.5197						-5.53837
-28.0056						-5.83409
-28.496						-6.10276
-28.9226						-6.37867
-29.4062						-6.63967
-29.8867						-6.84216
-29.3971						-6.9561
-28.9143						-6.98394
-28.4899						-6.9711
-28.0094						-6.96587
-27.5174						-6.95231
-27.0399						-6.93896
-26.5473						-6.92104
-26.0576						-6.90166
-25.5778						-6.88047
-25.0935						-6.85793
-24.6046						-6.83608
-24.121						-6.81516
-23.6906						-6.79219
-23.2139						-6.77116
-22.725						-6.74703
-22.2422						-6.72217
-21.7449						-6.69458
-21.2773						-6.66794
-20.7838						-6.64272
-20.2987						-6.61706
-19.8152						-6.59177
-19.3346						-6.56405
-18.9012						-6.53364
-18.4176						-6.50409
-17.9302						-6.47362
-17.4466						-6.44243
-16.9608						-6.41399
-16.4704						-6.38211
-15.986						-6.35052
-15.507						-6.31626
-15.0189						-6.282
-14.5315						-6.24865
-14.1041						-6.21495
-13.6206						-6.1786
-13.1393						-6.14166
-12.6542						-6.10426
-12.163						-6.06683
-11.6878						-6.02878
-11.1921						-5.98808
-10.7047						-5.94452
-10.2181						-5.90002
-9.73526						-5.85689
-9.31317						-5.81414
-8.8296						-5.77322
-8.34071						-5.72761
-7.85562						-5.67974
-7.37508						-5.63071
-6.88771						-5.58126
-6.39806						-5.53042
-5.91753						-5.47899
-5.43016						-5.42607
-4.94658						-5.37411
-4.5207						-5.32063
-4.03485						-5.26385
-3.54368						-5.20508
-3.06618						-5.14687
-2.57729						-5.08883
-2.09296						-5.02649
-1.60939						-4.96469
-1.11974						-4.90001
-0.636922						-4.80907
0.034161						-4.7535
0.034921						-4.71808
-0.21256							-6.30384
0.277847							-6.22138
0.832781							-6.13783
1.43782							-6.04932
1.97301							-5.9572
2.52719							-5.8649
3.06922							-5.76598
3.61656							-5.66173
4.21704							-5.55522
4.77274							-5.4449
5.31628							-5.33669
5.86059							-5.22251
6.41325							-5.0991
7.01297							-4.97165
7.55879							-4.84173
8.10538							-4.708
8.65652							-4.5667
9.26535							-4.41384
9.80358							-4.25559
10.3578							-4.0968
10.8967							-3.92732
11.4441							-3.74577
12.0506							-3.55087
12.6063							-3.3435
13.1484							-3.12349
13.6912							-2.89012
14.3015							-2.63594
14.8458							-2.36644
15.3825							-2.07745
15.9352							-1.76105
16.4787							-1.41408
17.0838							-1.03701
17.6357							-0.626527
18.183							-0.194451
18.7243							0.266496
19.2785							0.765135
19.8827							1.29421
20.427							1.83885
20.9774							2.3909
21.5179							2.93699
22.1268							3.47439
22.6703							3.98653
23.2283							4.45223
23.7642							4.87198
24.3101							5.25388
24.9288							5.5948
25.4586							5.89878
26.0105							6.16484
26.5579							6.40116
27.106							6.6215
27.7034							6.82274
28.2629							7.00613
28.8034							7.17602
29.3493							7.33764
29.9551							7.49451
30.5001							7.64316
31.0543							7.78235
31.5902							7.91575
32.1384							8.04903
32.7419							8.18382
33.2922							8.31097
33.8388							8.44957
34.3831							8.58091
34.9905							8.67537
34.3763							8.72144
33.8404							8.7242
33.2907							8.70902
32.7479							8.69917
32.1421							8.68136
31.5872							8.6639
31.0513							8.65035
30.5024							8.63356
29.9543							8.61599
29.3477							8.59559
28.8042							8.57516
28.2568							8.5558
27.7148							8.53641
27.1098							8.51555
26.5564							8.49511
26.0151							8.47216
25.4617							8.44754
24.9174							8.4235
24.3078							8.40202
23.7695							8.37873
23.2222							8.35499
22.6764							8.33016
22.1298							8.30342
21.5179							8.27427
20.9736							8.24657
20.4308							8.21631
19.8858							8.18825
19.2731							8.15813
18.7258							8.12811
18.1731							8.09883
17.6372							8.0692
17.0952							8.03637
16.4833							8.00268
15.9443							7.96762
15.3962							7.93339
14.8489							7.89894
14.3015							7.86357
13.6965							7.82437
13.1499							7.78513
12.598							7.74533
12.0522							7.70507
11.4517							7.66445
10.8983							7.62359
10.3517							7.58188
9.80738							7.54065
9.26535							7.49614
8.65424							7.44827
8.10917							7.40096
7.5679							7.35389
7.01828							7.30436
6.40641							7.25369
5.86818							7.19766
5.31704							7.14535
4.7735							7.09271
4.22388							7.03663
3.62188							6.9789
3.0715							6.91959
2.52795							6.85907
1.97833							6.80148
1.42947							6.73437
0.826708							6.6708
0.276328							6.60495
-0.205728							6.53721
-0.75383							6.47058
-1.3619							6.39946
-1.91456							6.32294
-2.45052							6.24989
-3.00014							6.1702
-3.54976							6.08921
-4.15404							6.00739
-4.70289							5.9189
-5.24796							5.83548
-5.79682							5.74984
-6.33809							5.65428
-6.94541							5.55599
-7.49578							5.45605
-8.03857							5.35373
-8.59275							5.249
-9.19475							5.13648
-9.73298							5.0186
-10.2834							4.90026
-10.8299							4.77577
-11.3796							4.64325
-11.9816							4.50413
-12.5304							4.3601
-13.0725							4.20822
-13.619							4.04585
-14.2324							3.86615
-14.7805							3.67401
-15.318							3.47168
-15.8669							3.24763
-16.4172							2.99526
-17.0208							2.71498
-17.5658							2.40963
-18.1094							2.08765
-18.6537							1.74082
-19.2063							1.35455
-19.8152							0.933616
-20.358							0.486933
-20.9091							0.014593
-21.4542							-0.480668
-22.0516							-0.997034
-22.6043							-1.52199
-23.1531							-2.03541
-23.6967							-2.53545
-24.244							-3.02654
-24.8483							-3.499
-25.3941							-3.94428
-25.9437							-4.35222
-26.4934							-4.72575
-27.0377							-5.07785
-27.6427							-5.41027
-28.1832							-5.71829
-28.7336							-6.00611
-29.2771							-6.2737
-29.8822							-6.53227
-30.4379							-6.78031
-30.9738							-7.01316
-31.5189							-7.23129
-32.0617							-7.44709
-32.6713							-7.65886
-33.2186							-7.85941
-33.766							-8.07501
-34.3118							-8.28023
-34.9176							-8.44077
-34.3133							-8.52702
-33.7652							-8.54315
-33.2186							-8.52646
-32.6811							-8.51851
-32.067							-8.50385
-31.5227							-8.49032
-30.9769							-8.47867
-30.4318							-8.46354
-29.8814							-8.44385
-29.2771							-8.42301
-28.7343							-8.40127
-28.1878							-8.38225
-27.6404							-8.36222
-27.0361							-8.33775
-26.4865							-8.31643
-25.9422							-8.29258
-25.3858							-8.26835
-24.8551							-8.24616
-24.2455							-8.22045
-23.6876							-8.19168
-23.1471							-8.16376
-22.6103							-8.1359
-22.0577							-8.11011
-21.4504							-8.08174
-20.9061							-8.05075
-20.3625							-8.02012
-19.8106							-7.9906
-19.2071							-7.95795
-18.6575							-7.92517
-18.1124							-7.89115
-17.5651							-7.85774
-17.0223							-7.82102
-16.418							-7.78069
-15.8615							-7.74131
-15.3264							-7.70318
-14.779							-7.66529
-14.2279							-7.62499
-13.6244							-7.5834
-13.0732							-7.54031
-12.5297							-7.49751
-11.9816							-7.45126
-11.3758							-7.40291
-10.833							-7.35248
-10.2826							-7.30301
-9.73222							-7.25219
-9.19854							-7.20151
-8.58743							-7.14855
-8.04085							-7.09278
-7.49275							-7.03407
-6.94768							-6.97164
-6.33733							-6.90933
-5.79378							-6.84579
-5.24796							-6.78447
-4.69758							-6.72136
-4.15555							-6.65282
-3.54748							-6.58336
-2.99862							-6.51229
-2.45279							-6.43879
-1.91001							-6.37188
-1.36266							-6.29756
-0.757625							-6.18339
0.033402							-6.11304
0.036439							-6.06587
-0.271773								-4.82977
0.340096								-4.74316
0.949689								-4.65464
1.62153								-4.56007
2.21974								-4.46307
2.88475								-4.36067
3.4951								-4.2553
4.17225								-4.14547
4.7697								-4.02996
5.44002								-3.90892
6.10503								-3.7837
6.71387								-3.65425
7.3766								-3.51919
7.99075								-3.37937
8.65272								-3.2328
9.26383								-3.08097
9.92429								-2.91978
10.5346								-2.75233
11.2027								-2.57359
11.8146								-2.38741
12.4811								-2.18884
13.0861								-1.98212
13.7458								-1.76463
14.3622								-1.53048
15.0273								-1.2803
15.6991								-1.01211
16.3049								-0.728072
16.9646								-0.429927
17.5772								-0.117346
18.2453								0.213552
18.8503								0.553649
19.5206								0.906181
20.1234								1.25639
20.7907								1.60193
21.398								1.93205
22.0675								2.24756
22.6696								2.54073
23.3414								2.81265
23.9472								3.06332
24.6137								3.29682
25.2901								3.51475
25.8906								3.71792
26.5579								3.90638
27.1644								4.08113
27.8295								4.24649
28.4421								4.40235
29.1101								4.55309
29.7091								4.69567
30.3809								4.83536
30.9905								4.96804
31.6487								5.09912
32.2629								5.22685
32.9248								5.3497
33.5299								5.47142
34.1994								5.58984
34.8697								5.70531
35.4755								5.81942
36.1428								5.93126
36.7486								6.0421
37.4152								6.15403
38.0225								6.25819
38.6989								6.37391
39.2971								6.4862
39.9682								6.57369
39.2978								6.61887
38.6951								6.62704
38.0278								6.61792
37.419								6.61543
36.7562								6.60927
36.1489								6.60256
35.4771								6.59453
34.8682								6.58702
34.1979								6.5778
33.5344								6.56745
32.9309								6.55503
32.2537								6.54206
31.6457								6.52911
30.992								6.51574
30.3825								6.50082
29.7144								6.48511
29.1078								6.46767
28.4398								6.45028
27.8355								6.43222
27.166								6.41381
26.548								6.39473
25.8876								6.37407
25.284								6.35236
24.6137								6.33073
23.9457								6.30799
23.3422								6.28512
22.6771								6.26019
22.0615								6.23481
21.3965								6.2083
20.7922								6.1811
20.1264								6.15184
19.5237								6.12148
18.8495								6.08916
18.2422								6.05814
17.5765								6.02575
16.9653								5.99316
16.2981								5.95877
15.7014								5.92178
15.0265								5.88371
14.3592								5.84429
13.7504								5.80382
13.0854								5.76409
12.4727								5.72363
11.8184								5.6805
11.208								5.63744
10.5331								5.59077
9.92732								5.54322
9.26231								5.49461
8.65955								5.44576
7.98923								5.39426
7.38343								5.34237
6.71766								5.28741
6.10579								5.232
5.44382								5.17474
4.77122								5.1158
4.17377								5.05506
3.49434								4.99369
2.88778								4.93147
2.21594								4.86746
1.61698								4.80195
0.944375								4.73517
0.342374								4.66761
-0.267978								4.59793
-0.879088								4.52634
-1.55169								4.45091
-2.14838								4.37431
-2.82022								4.29526
-3.42678								4.21491
-4.09938								4.13143
-4.70138								4.04365
-5.36715								3.95168
-6.03216								3.85691
-6.64327								3.76091
-7.31055								3.66214
-7.91939								3.55928
-8.58592								3.45001
-9.19399								3.33919
-9.85445								3.22303
-10.4656								3.10364
-11.1328								2.97578
-11.7462								2.84125
-12.4044								2.69739
-13.0216								2.54555
-13.6752								2.38271
-14.2916								2.20823
-14.9589								2.01925
-15.6209								1.81399
-16.232								1.59475
-16.9001								1.3591
-17.5089								1.11029
-18.1754								0.842477
-18.7827								0.563159
-19.4553								0.267672
-20.0573								-0.033999
-20.7269								-0.344924
-21.3312								-0.655243
-21.9947								-0.966147
-22.6043								-1.26869
-23.2769								-1.56454
-23.8728								-1.85038
-24.5462								-2.12847
-25.2165								-2.39492
-25.8147								-2.64832
-26.4926								-2.88791
-27.0976								-3.1153
-27.7626								-3.33565
-28.3646								-3.54569
-29.0418								-3.75099
-29.6438								-3.94949
-30.3141								-4.14382
-30.9139								-4.33227
-31.5758								-4.51727
-32.1862								-4.69438
-32.8535								-4.86859
-33.4517								-5.04057
-34.1212								-5.21093
-34.7991								-5.38066
-35.4004								-5.54694
-36.0715								-5.70979
-36.6742								-5.87504
-37.3468								-6.04341
-37.9549								-6.20726
-38.6176								-6.38864
-39.2325								-6.56508
-39.8922								-6.70586
-39.2265								-6.78758
-38.6199								-6.81657
-37.9481								-6.82016
-37.3514								-6.83177
-36.6765								-6.83843
-36.0775								-6.84359
-35.4057								-6.84561
-34.7984								-6.84523
-34.1273								-6.84224
-33.4608								-6.83866
-32.8557								-6.83397
-32.1877								-6.82891
-31.5827								-6.82226
-30.9176								-6.81461
-30.3126								-6.80636
-29.6468								-6.79741
-29.035								-6.78726
-28.3738								-6.77588
-27.7634								-6.76187
-27.09								-6.74684
-26.485								-6.73189
-25.8192								-6.71588
-25.2119								-6.69694
-24.5492								-6.67708
-23.8766								-6.65656
-23.2731								-6.63569
-22.605								-6.61329
-21.9969								-6.589
-21.3342								-6.56344
-20.7269								-6.53802
-20.0589								-6.51065
-19.4462								-6.48148
-18.782								-6.45023
-18.1671								-6.4194
-17.5043								-6.3859
-16.9069								-6.35186
-16.232								-6.31644
-15.6217								-6.27863
-14.9604								-6.23802
-14.2863								-6.1956
-13.6813								-6.15181
-13.0193								-6.10797
-12.4158								-6.0625
-11.7409								-6.01491
-11.1344								-5.96548
-10.4602								-5.91308
-9.86507								-5.859
-9.19627								-5.80313
-8.58516								-5.74733
-7.91711								-5.68838
-7.31207								-5.62721
-6.64858								-5.56334
-6.03747								-5.49753
-5.37626								-5.42965
-4.69834								-5.36009
-4.09938								-5.28804
-3.42298								-5.21328
-2.82326								-5.13457
-2.15521								-5.06033
-1.55093								-4.98201
-0.880607								-4.86548
0.03568								-4.79247
0.038716								-4.74531

## Sheet: Sr15
	Polarisation (μC.cm-2)
Electric Field (kV.cm-1)	5 kV.cm-1	10 kV.cm-1	15 kV.cm-1	20 kV.cm-1	25 kV.cm-1	30 kV.cm-1	35 kV.cm-1	40 kV.cm-1
-0.031397	-0.276676
0.071584	-0.238681
0.175194	-0.199673
0.275035	-0.160589
0.37676	-0.122468
0.479741	-0.085045
0.578955	-0.047398
0.675657	-0.008639
0.776126	0.030201
0.879107	0.069824
0.977065	0.109162
1.08695	0.149473
1.18428	0.189145
1.27973	0.228217
1.37831	0.268281
1.48067	0.307985
1.58428	0.348265
1.68223	0.389819
1.78522	0.431372
1.87878	0.474537
1.98678	0.516459
2.08411	0.557644
2.18144	0.599035
2.28003	0.640382
2.38489	0.682877
2.48285	0.726893
2.59023	0.770607
2.6863	0.815556
2.78677	0.858705
2.88598	0.902037
2.98645	0.945537
3.08881	0.989021
3.18676	1.03314
3.28661	1.07847
3.38959	1.1239
3.48943	1.17075
3.58801	1.21603
3.69099	1.26059
3.7833	1.30507
3.88691	1.34924
3.98989	1.39389
4.09099	1.4395
4.19271	1.48511
4.29507	1.53209
4.39177	1.57856
4.49726	1.62364
4.59522	1.66812
4.69569	1.71002
4.79427	1.76085
4.89349	1.80908
4.9927	1.8373
4.89537	1.83799
4.7993	1.81513
4.69192	1.7847
4.59333	1.76045
4.49035	1.73261
4.39302	1.70561
4.29381	1.67868
4.19271	1.65067
4.09099	1.62299
3.99115	1.59425
3.88691	1.5645
3.78832	1.53501
3.69162	1.50418
3.5899	1.47403
3.48943	1.44477
3.38896	1.41512
3.28912	1.38513
3.18927	1.35393
3.08504	1.32206
2.9852	1.28908
2.88284	1.25659
2.78614	1.225
2.68442	1.19344
2.58395	1.1611
2.47971	1.12868
2.38426	1.09523
2.27814	1.06231
2.1783	1.02944
2.08976	0.995033
1.98176	0.960753
1.88443	0.926749
1.78459	0.892612
1.68475	0.858978
1.57988	0.824763
1.47816	0.788799
1.38145	0.75365
1.27784	0.717764
1.18177	0.682284
1.08005	0.647057
0.976437	0.611687
0.879735	0.576391
0.779894	0.540527
0.679424	0.503744
0.577699	0.466475
0.47723	0.428554
0.37676	0.39096
0.276919	0.353855
0.177705	0.3172
0.077236	0.280543
-0.027629	0.242441
-0.129982	0.20368
-0.230452	0.164423
-0.334061	0.125519
-0.430763	0.087222
-0.526836	0.048258
-0.632329	0.01009
-0.728403	-0.028339
-0.834524	-0.0678
-0.932482	-0.108039
-1.03483	-0.149189
-1.13342	-0.189896
-1.23263	-0.22877
-1.3375	-0.269319
-1.43671	-0.309171
-1.53404	-0.350463
-1.63514	-0.391981
-1.73749	-0.433465
-1.83482	-0.475864
-1.93027	-0.518503
-2.03639	-0.559371
-2.13686	-0.601359
-2.23607	-0.642277
-2.33403	-0.685029
-2.43638	-0.729366
-2.5356	-0.773669
-2.63983	-0.81817
-2.73653	-0.861998
-2.84077	-0.904403
-2.94061	-0.947205
-3.04108	-0.990018
-3.14469	-1.03474
-3.23951	-1.08072
-3.34186	-1.12786
-3.44547	-1.17395
-3.54783	-1.21815
-3.64201	-1.2621
-3.74688	-1.30618
-3.84986	-1.34994
-3.94342	-1.39551
-4.04829	-1.44069
-4.14499	-1.48778
-4.24232	-1.53477
-4.35158	-1.57998
-4.44828	-1.62431
-4.54624	-1.66852
-4.65048	-1.7098
-4.74655	-1.76095
-4.84576	-1.80838
-4.94561	-1.83764
-4.85456	-1.83844
-4.75597	-1.81548
-4.64922	-1.7848
-4.5475	-1.76027
-4.44703	-1.73223
-4.34844	-1.70517
-4.24609	-1.67747
-4.14813	-1.6504
-4.04389	-1.62263
-3.9428	-1.59412
-3.84609	-1.56471
-3.74814	-1.53585
-3.64515	-1.5051
-3.54657	-1.47413
-3.43982	-1.44398
-3.34249	-1.41381
-3.24453	-1.38342
-3.14281	-1.35305
-3.04046	-1.32143
-2.9425	-1.28989
-2.84266	-1.25707
-2.74219	-1.2242
-2.64046	-1.19218
-2.53936	-1.16061
-2.43764	-1.12854
-2.33968	-1.0955
-2.23482	-1.06169
-2.13623	-1.02841
-2.03639	-0.994072
-1.93655	-0.95992
-1.83545	-0.925477
-1.73435	-0.89157
-1.632	-0.857924
-1.53655	-0.824104
-1.43546	-0.78949
-1.33499	-0.753758
-1.23577	-0.717222
-1.13656	-0.681818
-1.03232	-0.646456
-0.933109	-0.611538
-0.827617	-0.575829
-0.730287	-0.538677
-0.627934	-0.502031
-0.529976	-0.465299
-0.432646	-0.42794
-0.329665	-0.395216
-0.23108	-0.358612
-0.128098	-0.306467
0.020722	-0.274527
0.024489	-0.254187
-0.031397		-1.41675
0.071584		-1.36277
0.22794		-1.30203
0.382412		-1.23233
0.578955		-1.15534
0.727775		-1.08002
0.879735		-1.01124
1.02981		-0.94284
1.18114		-0.866561
1.38585		-0.786741
1.53341		-0.70693
1.67596		-0.629976
1.83419		-0.557784
1.98804		-0.477919
2.13184		-0.393323
2.33466		-0.305141
2.48348		-0.215441
2.63858		-0.13224
2.783		-0.04882
2.93873		0.043237
3.1359		0.139616
3.28974		0.238344
3.44108		0.335162
3.59052		0.424988
3.74123		0.521517
3.89382		0.626027
4.09224		0.736046
4.24044		0.847029
4.39365		0.949955
4.5431		1.05373
4.69255		1.16683
4.89726		1.28483
5.04545		1.40452
5.19615		1.51719
5.3456		1.62971
5.49568		1.75151
5.69473		1.87545
5.84983		1.99818
5.99928		2.11479
6.15124		2.22115
6.30006		2.33209
6.45265		2.44801
6.65045		2.56695
6.79487		2.68356
6.9506		2.7884
7.10193		2.89005
7.25075		2.99764
7.45734		3.10459
7.60239		3.2073
7.75812		3.30316
7.90694		3.38899
8.05702		3.47853
8.20835		3.56955
8.40364		3.66197
8.5556		3.75297
8.7063		3.83508
8.86266		3.91294
9.00959		3.9954
9.2099		4.07797
9.3581		4.15944
9.51068		4.2319
9.66264		4.31051
9.81272		4.38538
9.96656		4.43134
9.81209		4.43692
9.66202		4.4104
9.5132		4.37548
9.36061		4.34722
9.21367		4.31067
9.00834		4.27076
8.86014		4.23124
8.7107		4.19753
8.55685		4.1637
8.40427		4.12403
8.20709		4.08213
8.05451		4.04186
7.90945		4.0036
7.75561		3.96798
7.60428		3.92701
7.4542		3.88376
7.25326		3.83862
7.09879		3.79328
6.95248		3.75277
6.80429		3.71319
6.64856		3.66871
6.45641		3.62277
6.30194		3.57602
6.15249		3.53142
6.00179		3.49096
5.8492		3.44534
5.69662		3.39555
5.49505		3.34514
5.3412		3.29602
5.19552		3.2522
5.04231		3.20663
4.89349		3.15555
4.69757		3.10354
4.5475		3.05196
4.39302		3.00426
4.24232		2.95631
4.09036		2.90198
3.89382		2.84665
3.73935		2.79146
3.58676		2.73958
3.44045		2.69286
3.29477		2.64106
3.13716		2.58415
2.93308		2.52475
2.7874		2.46533
2.63607		2.41255
2.48222		2.35896
2.33528		2.29852
2.13309		2.23635
1.97862		2.17486
1.82917		2.11602
1.68161		2.0624
1.53216		2.00398
1.37957		1.94159
1.18303		1.87537
1.02856		1.8086
0.878479		1.74712
0.731543		1.68593
0.578327		1.6189
0.372365		1.54656
0.225428		1.47751
0.074724		1.41589
-0.022606		1.36161
-0.182101		1.29929
-0.331549		1.22819
-0.529348		1.1512
-0.685704		1.07567
-0.830756		1.005
-0.982716		0.933827
-1.13405		0.855452
-1.33122		0.774181
-1.48067		0.692871
-1.63137		0.613456
-1.78522		0.540722
-1.93404		0.460564
-2.08914		0.373936
-2.28756		0.28139
-2.44141		0.189056
-2.59399		0.104289
-2.73905		0.019666
-2.89289		-0.075507
-3.08818		-0.174591
-3.24139		-0.274812
-3.38833		-0.372281
-3.5428		-0.463989
-3.69225		-0.563058
-3.84233		-0.67032
-4.04138		-0.782383
-4.19522		-0.896863
-4.34656		-1.00257
-4.49601		-1.10801
-4.65425		-1.22323
-4.84765		-1.34424
-4.99521		-1.46657
-5.1478		-1.58076
-5.29788		-1.69284
-5.44858		-1.8146
-5.6514		-1.93948
-5.79708		-2.06229
-5.94842		-2.1788
-6.10038		-2.2853
-6.25296		-2.39585
-6.40555		-2.50976
-6.60335		-2.62439
-6.75468		-2.73783
-6.90287		-2.84077
-7.05672		-2.93988
-7.20868		-3.04316
-7.40648		-3.14656
-7.55844		-3.24615
-7.70977		-3.33942
-7.85671		-3.42098
-8.00804		-3.50701
-8.15686		-3.59586
-8.36219		-3.68584
-8.50787		-3.77275
-8.65732		-3.85113
-8.80803		-3.92692
-8.96187		-4.00849
-9.16281		-4.08878
-9.31163		-4.16716
-9.45794		-4.23685
-9.61429		-4.31433
-9.76437		-4.38752
-9.91884		-4.43201
-9.76625		-4.43744
-9.6168		-4.41197
-9.46547		-4.37595
-9.31414		-4.34624
-9.16344		-4.30926
-8.96375		-4.27068
-8.81305		-4.23198
-8.65104		-4.19726
-8.50913		-4.16164
-8.3534		-4.12184
-8.15874		-4.07959
-8.01243		-4.03892
-7.85671		-4.00007
-7.70851		-3.96577
-7.56472		-3.9257
-7.40522		-3.88191
-7.20114		-3.83556
-7.05672		-3.79143
-6.90664		-3.75222
-6.75908		-3.71277
-6.60147		-3.6668
-6.40304		-3.62015
-6.25045		-3.574
-6.10414		-3.5301
-5.95281		-3.48929
-5.79646		-3.44415
-5.64952		-3.39527
-5.44984		-3.34507
-5.29411		-3.29423
-5.14403		-3.24961
-5.00086		-3.20471
-4.84953		-3.15502
-4.65048		-3.10186
-4.49789		-3.04939
-4.34405		-3.00178
-4.19522		-2.95399
-4.04264		-2.89926
-3.84484		-2.84455
-3.69225		-2.78993
-3.54155		-2.73904
-3.38519		-2.69165
-3.24265		-2.63963
-3.09257		-2.58347
-2.88849		-2.52537
-2.73905		-2.46614
-2.58772		-2.41327
-2.43952		-2.35893
-2.28631		-2.29992
-2.08474		-2.23784
-1.93466		-2.17742
-1.78208		-2.11971
-1.63074		-2.06738
-1.48443		-2.00751
-1.33499		-1.94402
-1.13028		-1.87717
-0.982088		-1.81136
-0.833268		-1.75111
-0.682564		-1.69032
-0.529976		-1.62664
-0.327781		-1.55853
-0.179589		-1.46744
0.022606		-1.41456
0.023861		-1.38501
-0.077236			-2.94865
0.121819			-2.84891
0.379272			-2.74781
0.583978			-2.64383
0.826989			-2.53346
1.08193			-2.41278
1.33499			-2.28727
1.58616			-2.16452
1.78145			-2.0422
2.03137			-1.91001
2.28317			-1.77159
2.53057			-1.62779
2.73653			-1.48451
2.98834			-1.33399
3.23951			-1.16714
3.48943			-0.989613
3.74248			-0.81449
3.94154			-0.63626
4.19083			-0.442378
4.4464			-0.235167
4.69569			-0.020793
4.89286			0.194019
5.14403			0.425442
5.39897			0.670185
5.64764			0.92089
5.84795			1.16856
6.09786			1.41991
6.35281			1.6873
6.60021			1.95816
6.84825			2.21393
7.05232			2.45636
7.30412			2.69807
7.55593			2.93384
7.80459			3.16003
8.00678			3.3669
8.25733			3.5659
8.50473			3.76514
8.75716			3.95839
9.01022			4.13274
9.2143			4.29542
9.46108			4.45422
9.71413			4.60827
9.96405			4.75504
10.1619			4.89013
10.4218			5.0208
10.6623			5.15448
10.9185			5.28354
11.1709			5.40255
11.3643			5.51583
11.6193			5.63046
11.8711			5.74182
12.1267			5.85015
12.3238			5.9508
12.5725			6.05168
12.8237			6.15497
13.0755			6.25818
13.3285			6.35333
13.5295			6.44601
13.7794			6.53927
14.0262			6.63269
14.2811			6.71977
14.4783			6.8191
14.7313			6.91052
14.9844			6.96462
14.7338			6.96927
14.4783			6.93388
14.2824			6.88644
14.0293			6.8494
13.7744			6.80588
13.5263			6.76317
13.3248			6.72111
13.0704			6.67757
12.8268			6.62774
12.5763			6.5781
12.3213			6.5312
12.1204			6.48513
11.8742			6.4345
11.6212			6.38414
11.3713			6.33361
11.1766			6.28557
10.9185			6.23447
10.6692			6.17894
10.4174			6.12227
10.1694			6.06966
9.96405			6.01614
9.711			5.96016
9.46045			5.90275
9.21367			5.84547
9.00896			5.78976
8.76093			5.73286
8.50976			5.67111
8.25105			5.6089
8.01243			5.5489
7.80459			5.48945
7.55279			5.4262
7.29973			5.36239
7.05358			5.29796
6.8539			5.23569
6.60335			5.17177
6.35029			5.10258
6.0941			5.03074
5.84983			4.96356
5.65015			4.897
5.40086			4.82748
5.14215			4.75451
4.89537			4.68076
4.69569			4.60979
4.44326			4.53515
4.19397			4.45884
3.93714			4.38181
3.74186			4.30662
3.48754			4.23037
3.24139			4.14579
2.98457			4.05859
2.74219			3.97506
2.53622			3.8936
2.28254			3.80674
2.03513			3.71689
1.77705			3.62564
1.58679			3.53846
1.32808			3.448
1.08381			3.34819
0.83578			3.24454
0.577699			3.14355
0.376132			3.04569
0.126843			2.9451
-0.073468			2.84249
-0.329665			2.738
-0.530604			2.63177
-0.785545			2.51729
-1.03107			2.39117
-1.27784			2.26044
-1.53593			2.13407
-1.7287			2.00656
-1.98553			1.86746
-2.23858			1.72265
-2.48662			1.57342
-2.68693			1.42421
-2.94124			1.26597
-3.19304			1.08986
-3.43982			0.90402
-3.69099			0.719972
-3.89758			0.531059
-4.14625			0.325701
-4.40056			0.108113
-4.64859			-0.117282
-4.84451			-0.343786
-5.09505			-0.587749
-5.35188			-0.842186
-5.60431			-1.10106
-5.7996			-1.35557
-6.05014			-1.61362
-6.30131			-1.88456
-6.54935			-2.15618
-6.80241			-2.41013
-7.00837			-2.64986
-7.25452			-2.88558
-7.50695			-3.11402
-7.75687			-3.33174
-7.96157			-3.53122
-8.20709			-3.72095
-8.45638			-3.90898
-8.70944			-4.0905
-8.95999			-4.25547
-9.16846			-4.40928
-9.41649			-4.559
-9.66578			-4.70362
-9.91947			-4.84265
-10.1173			-4.97042
-10.3722			-5.09324
-10.6228			-5.21914
-10.8733			-5.34249
-11.1226			-5.45643
-11.3204			-5.56429
-11.5734			-5.67183
-11.8227			-5.77846
-12.0733			-5.8835
-12.2767			-5.98129
-12.526			-6.07762
-12.7728			-6.17741
-13.0265			-6.27791
-13.2814			-6.37085
-13.4792			-6.45974
-13.731			-6.55013
-13.9841			-6.64128
-14.2321			-6.72626
-14.4337			-6.82238
-14.6823			-6.91179
-14.9367			-6.96503
-14.6817			-6.96993
-14.4387			-6.93317
-14.2327			-6.88393
-13.9847			-6.84551
-13.7273			-6.80222
-13.483			-6.75867
-13.2808			-6.71565
-13.0271			-6.67188
-12.7778			-6.62291
-12.5223			-6.57289
-12.2711			-6.52539
-12.0783			-6.47916
-11.8246			-6.4292
-11.5709			-6.37847
-11.3216			-6.3268
-11.1238			-6.27712
-10.8702			-6.22677
-10.6184			-6.17192
-10.3678			-6.11514
-10.1154			-6.06192
-9.91696			-6.0091
-9.66578			-5.95268
-9.41273			-5.8945
-9.16532			-5.83621
-8.96375			-5.78111
-8.70944			-5.7249
-8.46455			-5.66206
-8.20898			-5.59854
-7.96283			-5.5392
-7.76189			-5.48047
-7.51072			-5.41783
-7.25703			-5.35301
-7.00774			-5.288
-6.80115			-5.2261
-6.54998			-5.16221
-6.30383			-5.09208
-6.0514			-5.02146
-5.80148			-4.95572
-5.60117			-4.88978
-5.34686			-4.81885
-5.09757			-4.74593
-4.84639			-4.67373
-4.65048			-4.60429
-4.39679			-4.52923
-4.14562			-4.45187
-3.89319			-4.37542
-3.69413			-4.30081
-3.44673			-4.22406
-3.1899			-4.13998
-2.93685			-4.05445
-2.68567			-3.97341
-2.48725			-3.89253
-2.23544			-3.8055
-1.98615			-3.71693
-1.72807			-3.62795
-1.53781			-3.54117
-1.28224			-3.45122
-1.03295			-3.35213
-0.780522			-3.25943
-0.533116			-3.16318
-0.327781			-3.02657
0.025745			-2.94316
0.026373			-2.89009
-0.126843				-4.21995
0.174566				-4.0892
0.479113				-3.94427
0.785545				-3.7945
1.13468				-3.63275
1.43294				-3.4554
1.77956				-3.2789
2.08411				-3.09385
2.38552				-2.89493
2.73905				-2.69523
3.03983				-2.47281
3.33684				-2.23294
3.69351				-1.98684
3.99429				-1.71213
4.29318				-1.42292
4.64608				-1.10287
4.94561				-0.74802
5.29788				-0.378237
5.59552				0.008668
5.90132				0.421277
6.25108				0.83549
6.54935				1.2645
6.85452				1.69133
7.19989				2.10398
7.50444				2.51003
7.80836				2.89132
8.15372				3.25409
8.4545				3.6066
8.80677				3.92802
9.10818				4.22105
9.41022				4.49358
9.76437				4.74238
10.0633				4.98187
10.3666				5.20422
10.7169				5.41242
11.0209				5.61331
11.3681				5.79733
11.6745				5.97142
11.9791				6.13963
12.3219				6.29656
12.6227				6.44815
12.9241				6.59668
13.2751				6.73558
13.5747				6.87327
13.8773				7.00329
14.2321				7.13155
14.5266				7.26324
14.8808				7.39157
15.1847				7.51048
15.4836				7.62977
15.8396				7.73804
16.1423				7.85067
16.4406				7.9585
16.7922				8.06784
17.0924				8.17937
17.4446				8.2878
17.741				8.38982
18.0456				8.49348
18.3972				8.59023
18.6911				8.69338
19.0013				8.78982
19.351				8.89877
19.6524				8.99538
19.957				9.05105
19.6543				9.05375
19.3504				9.01672
19.0013				8.96303
18.6986				8.92225
18.3953				8.87401
18.0468				8.82749
17.7423				8.77871
17.4484				8.72754
17.088				8.67488
16.7922				8.61955
16.4424				8.56602
16.1348				8.51282
15.839				8.45859
15.4798				8.4048
15.1853				8.34779
14.8827				8.29023
14.5323				8.22829
14.2302				8.16522
13.8767				8.10569
13.5853				8.04364
13.2758				7.97893
12.9266				7.91807
12.6227				7.85458
12.3276				7.79027
11.9703				7.72423
11.6695				7.65578
11.3681				7.58764
11.0184				7.51949
10.7201				7.44219
10.3672				7.37111
10.0639				7.29902
9.76751				7.22354
9.4121				7.1498
9.11132				7.07515
8.80489				6.99951
8.45324				6.92452
8.16251				6.83719
7.80773				6.75271
7.50318				6.67141
7.20428				6.58699
6.85201				6.50649
6.5506				6.42372
6.25296				6.33472
5.89755				6.24784
5.5974				6.15375
5.29223				6.05867
4.94498				5.96567
4.64734				5.86469
4.29381				5.76574
3.9968				5.66683
3.68911				5.56088
3.34124				5.45904
3.03794				5.34997
2.73779				5.23679
2.38238				5.1245
2.08474				5.00438
1.78019				4.88079
1.43546				4.75621
1.12777				4.62572
0.780522				4.49492
0.479741				4.36231
0.177077				4.22544
-0.127471				4.08568
-0.430763				3.93465
-0.73531				3.77857
-1.08444				3.61263
-1.38208				3.42922
-1.72807				3.24367
-2.03764				3.04888
-2.33654				2.84062
-2.68881				2.62894
-2.9921				2.39512
-3.28661				2.13666
-3.64453				1.87118
-3.94782				1.57658
-4.253				1.26658
-4.59836				0.928854
-4.89349				0.547302
-5.24953				0.149847
-5.55156				-0.26081
-5.84983				-0.695205
-6.20587				-1.12647
-6.50288				-1.56772
-6.80429				-2.0007
-7.15405				-2.40875
-7.45294				-2.80921
-7.75938				-3.1841
-8.106				-3.53636
-8.41243				-3.8761
-8.76093				-4.17987
-9.05983				-4.45564
-9.36563				-4.71329
-9.7179				-4.94707
-10.0206				-5.17203
-10.3188				-5.37572
-10.6705				-5.5635
-10.9744				-5.75203
-11.3204				-5.92434
-11.6218				-6.08898
-11.9232				-6.25071
-12.2786				-6.39924
-12.58				-6.54653
-12.8789				-6.68845
-13.2274				-6.81704
-13.5313				-6.94906
-13.8346				-7.07213
-14.1813				-7.19284
-14.4858				-7.31847
-14.8362				-7.43921
-15.1351				-7.55468
-15.4371				-7.66915
-15.7888				-7.77523
-16.087				-7.88453
-16.3935				-7.99184
-16.7489				-8.09783
-17.0402				-8.20602
-17.3963				-8.30956
-17.692				-8.41081
-17.9985				-8.51325
-18.347				-8.60842
-18.6528				-8.70574
-18.9479				-8.80035
-19.3027				-8.90903
-19.606				-9.00798
-19.8992				-9.06514
-19.6028				-9.06369
-19.2995				-9.02272
-18.9529				-8.96935
-18.6471				-8.92666
-18.3507				-8.87719
-17.9966				-8.83143
-17.6958				-8.78231
-17.4				-8.73404
-17.0421				-8.68112
-16.7451				-8.62422
-16.391				-8.56694
-16.0889				-8.51394
-15.7944				-8.45937
-15.4396				-8.404
-15.1376				-8.34408
-14.8331				-8.28526
-14.4814				-8.22477
-14.1844				-8.16223
-13.8321				-8.09911
-13.5288				-8.03747
-13.2249				-7.9752
-12.8783				-7.91517
-12.5775				-7.84869
-12.2736				-7.7801
-11.9219				-7.71376
-11.6231				-7.64727
-11.3204				-7.58022
-10.9744				-7.51107
-10.6711				-7.43746
-10.3176				-7.36639
-10.0193				-7.29644
-9.71853				-7.22304
-9.36626				-7.14947
-9.06171				-7.07021
-8.76219				-6.99407
-8.40678				-6.91689
-8.10788				-6.83142
-7.76				-6.74698
-7.45671				-6.66573
-7.15719				-6.58099
-6.80366				-6.50183
-6.50037				-6.41519
-6.20336				-6.32583
-5.85046				-6.23846
-5.55282				-6.14466
-5.24827				-6.05371
-4.89977				-5.95866
-4.5971				-5.85467
-4.2442				-5.75401
-3.94719				-5.6549
-3.64139				-5.5561
-3.29288				-5.45867
-2.99273				-5.34847
-2.68818				-5.23391
-2.33277				-5.12378
-2.03576				-5.00846
-1.73812				-4.89279
-1.38648				-4.77003
-1.08067				-4.64926
-0.735938				-4.51898
-0.433274				-4.33339
0.022606				-4.21695
0.023234				-4.14598
-0.128098					-5.49746
0.174566					-5.32768
0.578955					-5.14845
0.983344					-4.9542
1.38145					-4.73516
1.78208					-4.50573
2.1827					-4.25839
2.5896					-3.9908
2.98771					-3.69873
3.39147					-3.37701
3.79209					-3.02218
4.18706					-2.6326
4.59333					-2.19622
4.99019					-1.71337
5.3996					-1.18528
5.7996					-0.615415
6.19959					-0.015549
6.60335					0.608528
7.00272					1.23556
7.40711					1.84975
7.80396					2.43918
8.20647					2.9927
8.60583					3.5123
9.00834					3.98512
9.4121					4.40399
9.76186					4.78184
10.1681					5.12794
10.5681					5.45534
10.9725					5.76454
11.37					6.04592
11.7675					6.30645
12.175					6.55032
12.5756					6.77853
12.9781					6.99445
13.38					7.19593
13.7787					7.38815
14.1813					7.56921
14.5806					7.74548
14.9806					7.91634
15.3856					8.08159
15.7863					8.23716
16.1888					8.38679
16.5906					8.5301
16.9906					8.67507
17.3919					8.81367
17.7969					8.94665
18.1994					9.0756
18.6007					9.19981
19.0006					9.32077
19.3498					9.44199
19.7523					9.55854
20.1567					9.67731
20.5548					9.7945
20.9598					9.90947
21.3585					10.0231
21.7592					10.1329
22.1635					10.2405
22.5673					10.3488
22.9667					10.4577
23.366					10.5652
23.7648					10.6625
24.1679					10.7747
24.5679					10.8805
24.971					10.944
24.5679					10.9519
24.1685					10.9096
23.7704					10.8503
23.3654					10.8074
22.9654					10.7563
22.5679					10.7042
22.1598					10.6538
21.7623					10.6007
21.3604					10.5482
20.9529					10.4932
20.5542					10.4344
20.1542					10.3759
19.7548					10.319
19.3529					10.2607
19.0019					10.2027
18.5975					10.1434
18.1994					10.0806
17.7944					10.0169
17.3919					9.95325
17					9.88751
16.5875					9.81989
16.1862					9.74944
15.7875					9.67856
15.3875					9.60834
14.9831					9.53856
14.5831					9.46523
14.1825					9.38928
13.7725					9.31371
13.3731					9.2374
12.9781					9.1606
12.58					9.08312
12.175					9.00197
11.7725					8.91951
11.375					8.83358
10.9713					8.74781
10.5675					8.66172
10.1681					8.57581
9.76625					8.49147
9.40959					8.40422
9.01524					8.31496
8.60332					8.21954
8.20521					8.12096
7.80333					8.02233
7.4002					7.92409
7.00523					7.82235
6.60524					7.71598
6.20022					7.60438
5.79646					7.49097
5.39709					7.37512
4.99082					7.25764
4.59522					7.13832
4.19774					7.01556
3.79335					6.88959
3.39021					6.75751
2.99148					6.62241
2.58834					6.48125
2.18144					6.33742
1.78773					6.1843
1.37706					6.02675
0.978321					5.85571
0.580839					5.68159
0.178961					5.51128
-0.121191					5.33789
-0.53186					5.15168
-0.931854					4.94583
-1.33436					4.71581
-1.73435					4.4721
-2.13246					4.21008
-2.53685					3.92036
-2.9381					3.60507
-3.34249					3.25721
-3.7406					2.87548
-4.14499					2.45149
-4.5431					1.98201
-4.94309					1.45949
-5.35188					0.890077
-5.75124					0.279594
-6.15187					-0.357896
-6.55877					-1.01
-6.95562					-1.65696
-7.35687					-2.28536
-7.76126					-2.87555
-8.15749					-3.42068
-8.5512					-3.92151
-8.96375					-4.3711
-9.36877					-4.7682
-9.7179					-5.12302
-10.1122					-5.44736
-10.5154					-5.75085
-10.9254					-6.03616
-11.3242					-6.29517
-11.7235					-6.5348
-12.1254					-6.75703
-12.5267					-6.96609
-12.9229					-7.1636
-13.3298					-7.35159
-13.7317					-7.52887
-14.1335					-7.69776
-14.5304					-7.86299
-14.9341					-8.02084
-15.3385					-8.17442
-15.7348					-8.32227
-16.1417					-8.46535
-16.5373					-8.60578
-16.9429					-8.74178
-17.3442					-8.86807
-17.7454					-8.9958
-18.1498					-9.12383
-18.5498					-9.24622
-18.9542					-9.36302
-19.3008					-9.47996
-19.7046					-9.59682
-20.1052					-9.71415
-20.5039					-9.82764
-20.9058					-9.93547
-21.3077					-10.044
-21.7108					-10.1551
-22.1139					-10.2625
-22.5177					-10.3674
-22.9152					-10.47
-23.3177					-10.5747
-23.7183					-10.6733
-24.1208					-10.7908
-24.5277					-10.8994
-24.929					-10.9633
-24.5202					-10.966
-24.1221					-10.92
-23.724					-10.8598
-23.3171					-10.8144
-22.9164					-10.7637
-22.5164					-10.71
-22.1171					-10.6554
-21.7077					-10.6023
-21.3089					-10.5515
-20.9045					-10.4959
-20.5064					-10.4395
-20.1077					-10.3766
-19.697					-10.315
-19.2989					-10.2584
-18.9567					-10.2037
-18.5504					-10.143
-18.146					-10.0773
-17.7442					-10.0103
-17.3473					-9.94611
-16.9435					-9.882
-16.541					-9.81136
-16.1385					-9.73855
-15.7348					-9.66598
-15.3341					-9.59682
-14.9354					-9.52741
-14.5298					-9.45656
-14.1298					-9.38104
-13.7291					-9.30184
-13.3285					-9.22084
-12.9266					-9.14197
-12.5317					-9.06141
-12.1229					-8.97834
-11.7185					-8.8955
-11.3216					-8.81173
-10.9242					-8.72523
-10.5198					-8.63573
-10.1154					-8.54948
-9.71225					-8.46291
-9.36689					-8.37746
-8.95936					-8.28593
-8.56502					-8.18791
-8.16125					-8.09084
-7.75373					-7.99297
-7.35624					-7.8909
-6.95562					-7.78864
-6.55374					-7.68026
-6.15438					-7.57043
-5.75187					-7.46246
-5.35313					-7.34923
-4.94435					-7.23325
-4.55001					-7.11302
-4.14562					-6.98691
-3.74437					-6.86046
-3.34249					-6.73286
-2.93747					-6.60114
-2.53811					-6.46416
-2.13184					-6.32107
-1.73561					-6.17088
-1.33499					-6.03024
-0.932482					-5.87119
-0.529348					-5.63497
0.023861					-5.48777
0.022606					-5.39787
-0.176449						-6.52649
0.221661						-6.31197
0.731543						-6.0825
1.18428						-5.83619
1.68161						-5.56325
2.13623						-5.26293
2.63607						-4.92475
3.13716						-4.5472
3.5899						-4.12942
4.09476						-3.66181
4.54687						-3.13661
5.03854						-2.53479
5.50007						-1.87132
5.99488						-1.15308
6.45014						-0.378004
6.95311						0.423713
7.45922						1.21745
7.90757						1.97189
8.41054						2.66624
8.86391						3.30195
9.36061						3.89793
9.81712						4.43233
10.3176						4.92411
10.7691						5.36068
11.2702						5.76382
11.7235						6.13497
12.2252						6.48173
12.7238						6.80355
13.1784						7.09955
13.6789						7.37038
14.1316						7.62304
14.629						7.86754
15.083						8.09697
15.5866						8.31564
16.0406						8.5231
16.5385						8.72302
17.0484						8.91801
17.4905						9.10592
17.9928						9.28168
18.4462						9.44892
18.9492						9.61534
19.4013						9.77417
19.9049						9.93237
20.3513						10.0818
20.86						10.2269
21.3045						10.3686
21.8081						10.5093
22.3143						10.6494
22.7689						10.7863
23.2687						10.9194
23.7221						11.0471
24.2225						11.1746
24.669						11.2927
25.177						11.4136
25.6272						11.533
26.1252						11.6563
26.6294						11.7766
27.0815						11.8923
27.5807						12.0028
28.0297						12.1129
28.5327						12.2193
28.9829						12.3467
29.4884						12.4633
29.9386						12.5305
29.4846						12.5354
28.9798						12.4894
28.5346						12.4326
28.0316						12.3877
27.582						12.3371
27.0784						12.2857
26.6282						12.2312
26.1233						12.1758
25.6291						12.1195
25.1764						12.0619
24.6734						12.0064
24.2181						11.9472
23.7196						11.8837
23.2706						11.8226
22.7632						11.759
22.3143						11.6945
21.8075						11.6312
21.3052						11.5653
20.86						11.4967
20.3595						11.427
19.8973						11.3557
19.4057						11.2846
18.9517						11.2119
18.4487						11.1358
17.9928						11.0592
17.4942						10.9822
17.0402						10.9056
16.5322						10.8277
16.0399						10.7462
15.5809						10.6618
15.083						10.5764
14.6309						10.4905
14.1342						10.4031
13.6758						10.3129
13.1822						10.2229
12.727						10.1288
12.224						10.0346
11.7235						9.9362
11.267						9.83672
10.7691						9.73549
10.3163						9.63418
9.81649						9.52638
9.36249						9.4198
8.85512						9.30899
8.40615						9.1963
7.90694						9.07975
7.45546						8.95822
6.95562						8.83205
6.45139						8.70155
5.99865						8.57147
5.49191						8.43697
5.04608						8.29938
4.54812						8.15285
4.09287						8.0012
3.58864						7.84608
3.13653						7.68402
2.63544						7.51308
2.13309						7.33066
1.68475						7.14122
1.17989						6.94083
0.730287						6.73947
0.229824						6.52155
-0.172682						6.29374
-0.681308						6.03826
-1.13279						5.76737
-1.63326						5.47059
-2.086						5.13905
-2.59023						4.76686
-3.08943						4.34829
-3.54594						3.88691
-4.04326						3.36776
-4.49601						2.78842
-4.98893						2.12645
-5.44733						1.40913
-5.94779						0.636357
-6.40744						-0.186114
-6.90162						-1.02797
-7.40962						-1.84936
-7.85859						-2.61978
-8.36533						-3.31725
-8.81179						-3.94619
-9.31477						-4.52242
-9.765						-5.0241
-10.268						-5.48216
-10.7195						-5.88275
-11.2243						-6.25357
-11.6714						-6.59083
-12.1725						-6.90717
-12.678						-7.1939
-13.1244						-7.46059
-13.6299						-7.70099
-14.0839						-7.9331
-14.58						-8.15487
-15.0378						-8.36071
-15.5326						-8.55586
-15.9884						-8.74753
-16.4902						-8.93291
-16.9982						-9.11194
-17.4478						-9.27822
-17.9401						-9.43643
-18.406						-9.58937
-18.9014						-9.74507
-19.3529						-9.89365
-19.8559						-10.0421
-20.3049						-10.1832
-20.8091						-10.3223
-21.2556						-10.4571
-21.7623						-10.5938
-22.2615						-10.7266
-22.7117						-10.8551
-23.2178						-10.9797
-23.6681						-11.1014
-24.1754						-11.2235
-24.6232						-11.3463
-25.1268						-11.4642
-25.5732						-11.5814
-26.0762						-11.6979
-26.5748						-11.8136
-27.0351						-11.9258
-27.5299						-12.0338
-27.982						-12.1387
-28.4837						-12.2441
-28.9346						-12.3662
-29.4388						-12.4839
-29.8934						-12.5526
-29.435						-12.5609
-28.939						-12.5134
-28.4875						-12.4529
-27.9782						-12.4045
-27.5261						-12.3543
-27.0275						-12.3008
-26.5767						-12.2469
-26.0793						-12.1893
-25.5764						-12.1307
-25.1224						-12.0721
-24.6194						-12.0148
-24.1711						-11.9542
-23.6706						-11.8899
-23.2178						-11.8256
-22.7218						-11.7607
-22.2672						-11.6952
-21.7629						-11.6263
-21.2606						-11.556
-20.8072						-11.4865
-20.3099						-11.418
-19.8515						-11.3484
-19.3517						-11.275
-18.8983						-11.2004
-18.3991						-11.1247
-17.9432						-11.0495
-17.4465						-10.9723
-16.9913						-10.8921
-16.4921						-10.8097
-15.9878						-10.7269
-15.537						-10.6423
-15.0359						-10.5561
-14.5825						-10.4723
-14.0839						-10.3822
-13.6306						-10.2919
-13.1282						-10.1983
-12.6786						-10.1029
-12.175						-10.008
-11.6701						-9.91043
-11.2243						-9.80548
-10.7182						-9.7023
-10.2661						-9.59915
-9.76751						-9.49374
-9.3154						-9.38795
-8.80865						-9.27465
-8.35905						-9.16108
-7.85294						-9.04429
-7.40585						-8.92397
-6.90602						-8.80071
-6.3999						-8.67357
-5.94842						-8.54369
-5.4467						-8.40879
-4.9971						-8.2711
-4.49349						-8.12772
-4.04892						-7.97909
-3.54029						-7.82626
-3.08943						-7.66686
-2.58583						-7.50084
-2.08348						-7.32604
-1.63074						-7.16339
-1.13593						-6.97882
-0.679424						-6.6976
0.02135						-6.51759
0.023861						-6.40423
-0.225428							-7.35429
0.278803							-7.09954
0.830756							-6.83405
1.38711							-6.53083
1.93152							-6.18236
2.5356							-5.79587
3.08881							-5.35942
3.64201							-4.87095
4.19522							-4.31865
4.74718							-3.69186
5.29913							-2.96478
5.84606							-2.13843
6.45516							-1.23802
7.00146							-0.319372
7.55342							0.574049
8.10725							1.41581
8.66109							2.20425
9.21179							2.93019
9.765							3.60592
10.376							4.2242
10.9223							4.78344
11.4717							5.28011
12.0256							5.72626
12.5769							6.143
13.1244							6.53347
13.6783							6.90486
14.2817							7.25543
14.8287							7.58049
15.3863							7.88274
15.9388							8.16704
16.4958							8.43422
17.0453							8.69136
17.5978							8.9355
18.1975							9.17402
18.7476							9.40351
19.3046							9.62284
19.8521							9.83258
20.4066							10.0327
20.956							10.2254
21.5124							10.4179
22.1171							10.6036
22.6684							10.7884
23.216							10.9626
23.7673							11.1293
24.3186							11.2891
24.8731							11.448
25.4206							11.6049
26.0228							11.7625
26.5779							11.9155
27.1324							12.0644
27.6806							12.2081
28.2357							12.3511
28.7876							12.4863
29.3333							12.622
29.9405							12.7574
30.4981							12.8897
31.0425							13.0174
31.5957							13.143
32.1496							13.2668
32.6959							13.3941
33.2503							13.5122
33.8544							13.6511
34.4039							13.7772
34.9577							13.8554
34.4039							13.8609
33.8569							13.8146
33.2535							13.7536
32.7059							13.7113
32.1464							13.6614
31.5989							13.6087
31.0444							13.5526
30.4975							13.4929
29.9386							13.4329
29.332							13.3753
28.7857							13.319
28.23							13.2599
27.685							13.2
27.1292							13.1331
26.5785							13.0652
26.0247							12.9991
25.4288							12.9293
24.8762							12.8581
24.3224							12.7834
23.7736							12.7073
23.2153							12.6352
22.6684							12.5631
22.1127							12.4854
21.5099							12.4056
20.9554							12.322
20.4053							12.2389
19.854							12.1568
19.3027							12.0756
18.7526							11.9904
18.1944							11.8992
17.5985							11.804
17.0421							11.7071
16.4864							11.6148
15.9414							11.5235
15.3831							11.4274
14.8343							11.3291
14.2798							11.224
13.6802							11.1128
13.1232							11.0038
12.5756							10.8933
12.0224							10.7815
11.4705							10.6674
10.9217							10.5462
10.364							10.4208
9.76939							10.2905
9.21493							10.157
8.65607							10.0238
8.11228							9.88899
7.55655							9.7516
7.0046							9.60605
6.4539							9.44682
5.85674							9.28091
5.29662							9.11342
4.74781							8.94049
4.19397							8.76624
3.64264							8.58115
3.0932							8.38115
2.53811							8.16453
1.93529							7.93378
1.38083							7.68469
0.825733							7.43016
0.278803							7.16556
-0.225428							6.87784
-0.783033							6.56805
-1.32871							6.21631
-1.87689							5.8127
-2.48725							5.36053
-3.03731							4.85388
-3.59555							4.2907
-4.14248							3.66454
-4.69946							2.96451
-5.24639							2.16926
-5.7996							1.28236
-6.40178							0.333143
-6.95248							-0.628973
-7.50946							-1.55743
-8.05827							-2.42298
-8.60834							-3.22262
-9.15779							-3.94761
-9.71602							-4.6081
-10.317							-5.20423
-10.8702							-5.73244
-11.4215							-6.19822
-11.9665							-6.61283
-12.5279							-6.98979
-13.0742							-7.3389
-13.6312							-7.66941
-14.2284							-7.98067
-14.7841							-8.27341
-15.3367							-8.53939
-15.8899							-8.78626
-16.4406							-9.02002
-16.9931							-9.24776
-17.5476							-9.46965
-18.1435							-9.6837
-18.6967							-9.88797
-19.2524							-10.0814
-19.8013							-10.2624
-20.3557							-10.4381
-20.9058							-10.6111
-21.4628							-10.784
-22.0574							-10.9523
-22.6175							-11.1122
-23.1651							-11.2667
-23.7171							-11.4165
-24.2684							-11.5646
-24.8241							-11.7095
-25.383							-11.8496
-25.9751							-11.9896
-26.5264							-12.126
-27.0865							-12.2568
-27.6272							-12.3859
-28.1829							-12.5122
-28.7317							-12.6327
-29.2868							-12.7563
-29.8865							-12.8801
-30.4416							-13.005
-30.9892							-13.1281
-31.5449							-13.2445
-32.0981							-13.3576
-32.6475							-13.4752
-33.2014							-13.5875
-33.8042							-13.7135
-34.3574							-13.8311
-34.9068							-13.9012
-34.3543							-13.9085
-33.801							-13.8635
-33.1989							-13.7975
-32.6526							-13.7464
-32.0937							-13.6946
-31.5493							-13.6424
-30.9948							-13.5934
-30.446							-13.5382
-29.8909							-13.4789
-29.2906							-13.4145
-28.7317							-13.3506
-28.1823							-13.2857
-27.6285							-13.2231
-27.0784							-13.1559
-26.5296							-13.0913
-25.9745							-13.0233
-25.3767							-12.9531
-24.8222							-12.8806
-24.2665							-12.8092
-23.7177							-12.737
-23.167							-12.6648
-22.6144							-12.5862
-22.0637							-12.5078
-21.459							-12.43
-20.9071							-12.3487
-20.3564							-12.2675
-19.805							-12.183
-19.2518							-12.0974
-18.6967							-12.0096
-18.1479							-11.9207
-17.5501							-11.8294
-16.9938							-11.7381
-16.4355							-11.6415
-15.8855							-11.5451
-15.3379							-11.4477
-14.7841							-11.3477
-14.2365							-11.2433
-13.6299							-11.1366
-13.0773							-11.0261
-12.5285							-10.9163
-11.9709							-10.8035
-11.4215							-10.6889
-10.8727							-10.5743
-10.3207							-10.4534
-9.71351							-10.3252
-9.16783							-10.1948
-8.61651							-10.0627
-8.05702							-9.92998
-7.50632							-9.79632
-6.94934							-9.65389
-6.40492							-9.50373
-5.79771							-9.34828
-5.24764							-9.1835
-4.69569							-9.01746
-4.1406							-8.84589
-3.59429							-8.67078
-3.04108							-8.49085
-2.48473							-8.29091
-1.88254							-8.09976
-1.33373							-7.87621
-0.783661							-7.5402
0.024489							-7.33362
0.023234							-7.20134
-0.276919								-7.288
0.326526								-6.99853
0.978949								-6.68477
1.58804								-6.34991
2.23544								-5.96552
2.88724								-5.54149
3.5359								-5.0677
4.14499								-4.52815
4.79867								-3.92406
5.45047								-3.24432
6.04826								-2.49432
6.69628								-1.69031
7.35876								-0.865966
8.00741								-0.059695
8.60772								0.690481
9.26516								1.40306
9.91445								2.06391
10.5713								2.67434
11.1716								3.22739
11.8284								3.74649
12.4739								4.23038
13.127								4.67979
13.7329								5.09583
14.3828								5.48708
15.0346								5.85689
15.6399								6.20818
16.2905								6.54533
16.941								6.87088
17.5978								7.18014
18.1981								7.46782
18.8506								7.75151
19.5017								8.02796
20.1548								8.29429
20.7595								8.54715
21.4069								8.79033
22.0618								9.03001
22.713								9.26095
23.3208								9.48297
23.9701								9.69978
24.6225								9.91428
25.2235								10.1203
25.8746								10.3261
26.5283								10.5233
27.1826								10.717
27.7773								10.9051
28.4322								11.0924
29.0859								11.2772
29.7415								11.4594
30.3455								11.6339
30.9948								11.8076
31.6428								11.982
32.3022								12.1582
32.8987								12.3315
33.5549								12.503
34.2042								12.6724
34.8629								12.8421
35.4638								13.0127
36.1194								13.1816
36.7649								13.3435
37.3646								13.5039
38.0176								13.6605
38.6751								13.8454
39.3256								14.0221
39.929								14.1454
39.3275								14.1874
38.6744								14.166
38.0226								14.1214
37.3646								14.0896
36.7668								14.0484
36.1175								14.0041
35.4582								13.9546
34.8641								13.9047
34.2067								13.8529
33.5574								13.8013
32.9006								13.7478
32.299								13.6915
31.6497								13.6263
30.9948								13.5583
30.3455								13.4883
29.7402								13.4234
29.0871								13.3592
28.4379								13.291
27.7792								13.2194
27.1851								13.1461
26.5277								13.0693
25.8771								12.9898
25.2285								12.9104
24.6263								12.8292
23.9689								12.7483
23.3183								12.663
22.7168								12.575
22.0581								12.4844
21.4088								12.3952
20.762								12.2991
20.1567								12.2061
19.5036								12.1049
18.8525								12.0034
18.1969								11.8998
17.6041								11.7967
16.946								11.687
16.2924								11.5746
15.6368								11.4542
15.0327								11.3354
14.3878								11.2133
13.7266								11.0922
13.1295								10.964
12.4796								10.8322
11.8171								10.6911
11.1722								10.5444
10.5681								10.396
9.91759								10.2398
9.26453								10.0767
8.60897								9.9103
8.00929								9.74011
7.35499								9.55958
6.70319								9.37196
6.0514								9.17808
5.45109								8.97292
4.79867								8.75839
4.14311								8.52849
3.54217								8.28488
2.88849								8.02718
2.23921								7.75102
1.5893								7.4489
0.976437								7.13614
0.329665								6.79414
-0.278803								6.43085
-0.92683								6.03179
-1.53718								5.58968
-2.18144								5.0833
-2.83638								4.52533
-3.48943								3.90983
-4.09476								3.22765
-4.74843								2.47402
-5.39897								1.65145
-5.99865								0.766823
-6.6517								-0.161529
-7.30601								-1.09737
-7.95969								-1.99685
-8.55748								-2.82284
-9.21556								-3.58088
-9.86484								-4.26579
-10.5191								-4.87678
-11.1195								-5.41201
-11.7744								-5.89943
-12.4256								-6.34725
-13.0742								-6.75844
-13.6733								-7.13618
-14.3332								-7.48526
-14.98								-7.80904
-15.5897								-8.11029
-16.2365								-8.39926
-16.892								-8.67769
-17.5482								-8.94091
-18.1504								-9.18392
-18.8028								-9.41591
-19.449								-9.64186
-20.1064								-9.86125
-20.7061								-10.069
-21.3529								-10.2682
-22.0135								-10.4616
-22.6628								-10.648
-23.27								-10.8274
-23.9167								-11.0008
-24.5679								-11.1672
-25.1776								-11.3293
-25.8231								-11.4906
-26.4781								-11.6455
-27.1249								-11.7988
-27.7258								-11.9435
-28.3857								-12.0852
-29.0382								-12.2285
-29.6969								-12.3668
-30.2921								-12.5013
-30.9439								-12.6352
-31.5951								-12.7667
-32.2482								-12.8962
-32.8478								-13.0213
-33.5034								-13.1455
-34.1514								-13.2706
-34.8064								-13.3905
-35.4111								-13.5084
-36.0654								-13.622
-36.7147								-13.7334
-37.3181								-13.8431
-37.9661								-13.9504
-38.616								-14.0757
-39.2741								-14.1948
-39.8732								-14.2643
-39.2722								-14.2701
-38.6229								-14.226
-37.9724								-14.167
-37.3168								-14.1186
-36.7103								-14.0666
-36.0635								-14.0113
-35.4117								-13.957
-34.8095								-13.8994
-34.1527								-13.8394
-33.5021								-13.778
-32.8478								-13.7161
-32.2482								-13.6518
-31.5957								-13.5876
-30.9465								-13.522
-30.294								-13.4552
-29.6918								-13.3863
-29.0357								-13.3149
-28.382								-13.243
-27.7302								-13.1713
-27.1274								-13.0997
-26.4775								-13.0215
-25.8238								-12.9433
-25.1726								-12.864
-24.5742								-12.7801
-23.9199								-12.6963
-23.2675								-12.6109
-22.6628								-12.5247
-22.0135								-12.4384
-21.3573								-12.3483
-20.7067								-12.2525
-20.1052								-12.158
-19.4534								-12.0598
-18.7997								-11.9611
-18.1473								-11.8599
-17.5451								-11.7578
-16.8964								-11.6499
-16.2359								-11.5407
-15.5897								-11.4288
-14.9831								-11.3153
-14.3351								-11.2009
-13.6783								-11.084
-13.0792								-10.9628
-12.4287								-10.8328
-11.77								-10.6993
-11.1207								-10.5646
-10.5198								-10.4257
-9.86735								-10.2828
-9.21367								-10.1354
-8.55685								-9.98747
-7.96094								-9.83768
-7.30475								-9.67695
-6.65421								-9.50515
-6.00493								-9.33071
-5.39835								-9.14952
-4.74655								-8.96445
-4.09162								-8.77178
-3.48943								-8.56979
-2.837								-8.34648
-2.18521								-8.13997
-1.53341								-7.89762
-0.935621								-7.5308
0.019466								-7.30051
0.025745								-7.15005

## Sheet: Sr20
	Polarisation (μC.cm-2)
Electric Field (kV.cm-1)	5 kV.cm-1	10 kV.cm-1	15 kV.cm-1	20 kV.cm-1	25 kV.cm-1	30 kV.cm-1	35 kV.cm-1	40 kV.cm-1
-0.02454	-0.029679
0.075507	-0.005088
0.181847	0.020265
0.280007	0.046135
0.381942	0.069814
0.480731	0.095879
0.583295	0.120559
0.682084	0.145305
0.782131	0.171046
0.882178	0.195195
0.984742	0.219586
1.08542	0.244978
1.18421	0.268983
1.29055	0.295866
1.3843	0.321488
1.48435	0.346315
1.58566	0.371745
1.68696	0.395147
1.79078	0.419777
1.88957	0.446261
1.99151	0.470868
2.09281	0.497256
2.18783	0.522249
2.28662	0.547507
2.38981	0.57344
2.49237	0.598731
2.59494	0.624042
2.69813	0.649595
2.79629	0.674831
2.89508	0.701756
2.99639	0.72667
3.10336	0.752436
3.19648	0.777207
3.29967	0.801713
3.39972	0.827292
3.50103	0.853197
3.60296	0.878992
3.69986	0.905997
3.80117	0.931427
3.89996	0.957672
4.00252	0.983382
4.10886	1.00915
4.21017	1.03542
4.3121	1.06109
4.40586	1.08665
4.50968	1.11269
4.60281	1.13794
4.70474	1.16255
4.80731	1.19324
4.91553	1.22007
5.00677	1.23123
4.90924	1.2223
4.81486	1.19728
4.71292	1.16865
4.60344	1.14543
4.50465	1.12121
4.40712	1.0974
4.30707	1.07355
4.21017	1.04814
4.1032	1.02266
4.00441	0.998018
3.90436	0.974038
3.79991	0.949718
3.70615	0.925343
3.59856	0.900265
3.50291	0.8754
3.40476	0.850957
3.30219	0.825926
3.199	0.802438
3.09643	0.777638
2.99135	0.752434
2.89445	0.728098
2.79755	0.702204
2.69562	0.676898
2.59305	0.65223
2.49426	0.626197
2.39233	0.60327
2.2885	0.578803
2.19097	0.553682
2.0903	0.529449
1.99025	0.503744
1.89335	0.478627
1.79078	0.454349
1.69388	0.429112
1.59195	0.405859
1.48938	0.38118
1.38808	0.355924
1.2874	0.330902
1.18735	0.304645
1.08605	0.279675
0.980338	0.255392
0.884066	0.230441
0.785906	0.207317
0.682713	0.18223
0.583295	0.157562
0.485764	0.133161
0.380054	0.10679
0.28504	0.080967
0.176813	0.056163
0.078024	0.030347
-0.023281	0.006352
-0.120183	-0.019266
-0.227151	-0.04422
-0.330345	-0.068378
-0.425988	-0.093568
-0.527293	-0.118721
-0.628599	-0.143863
-0.729905	-0.169371
-0.826806	-0.193482
-0.933146	-0.219354
-1.03256	-0.243776
-1.13135	-0.268612
-1.2314	-0.294894
-1.33459	-0.320015
-1.43716	-0.345176
-1.53406	-0.370496
-1.62781	-0.393871
-1.73478	-0.419617
-1.83483	-0.444611
-1.93739	-0.469518
-2.04185	-0.495788
-2.13938	-0.521348
-2.23816	-0.546451
-2.33821	-0.572234
-2.44015	-0.597203
-2.53894	-0.623432
-2.64402	-0.648658
-2.73903	-0.673552
-2.84348	-0.699376
-2.93535	-0.725295
-3.04421	-0.749996
-3.143	-0.775382
-3.24619	-0.800219
-3.34749	-0.826275
-3.44188	-0.85271
-3.55199	-0.878523
-3.6489	-0.904437
-3.7502	-0.930691
-3.85088	-0.956082
-3.94652	-0.981976
-4.04846	-1.00782
-4.14976	-1.03396
-4.2561	-1.05915
-4.35678	-1.0853
-4.44802	-1.1117
-4.55436	-1.1376
-4.6544	-1.16182
-4.75068	-1.19144
-4.85513	-1.21799
-4.95329	-1.23064
-4.85387	-1.22072
-4.76074	-1.19631
-4.65503	-1.16765
-4.55121	-1.14435
-4.45179	-1.12049
-4.35174	-1.09522
-4.25673	-1.07073
-4.15354	-1.04743
-4.05034	-1.02158
-3.94841	-0.99755
-3.85025	-0.972891
-3.74706	-0.948409
-3.65141	-0.924437
-3.54885	-0.898518
-3.44817	-0.873408
-3.34435	-0.849578
-3.25059	-0.824495
-3.14551	-0.800773
-3.04735	-0.775343
-2.94038	-0.750286
-2.84348	-0.72591
-2.74218	-0.699477
-2.64339	-0.675013
-2.54208	-0.650221
-2.44141	-0.624886
-2.33821	-0.601283
-2.23565	-0.576251
-2.13749	-0.552006
-2.03555	-0.528067
-1.93677	-0.501556
-1.83609	-0.476432
-1.73164	-0.451094
-1.63599	-0.425609
-1.53972	-0.40248
-1.44093	-0.377532
-1.33208	-0.35268
-1.23455	-0.328679
-1.13009	-0.302754
-1.03445	-0.278216
-0.928741	-0.253391
-0.834986	-0.227233
-0.729905	-0.203682
-0.627341	-0.178677
-0.524776	-0.15381
-0.429763	-0.129217
-0.329716	-0.105304
-0.226522	-0.079049
-0.124587	-0.04479
0.030203	-0.023733
0.028315	-0.012598
-0.027057		-0.063209
0.075507		-0.032817
0.232815		0.004094
0.386346		0.045309
0.582666		0.090022
0.738714		0.132136
0.882178		0.170148
1.03948		0.207896
1.18735		0.251627
1.38808		0.294757
1.53595		0.336942
1.68444		0.375951
1.84112		0.410719
1.99402		0.450246
2.13749		0.493174
2.34388		0.537298
2.49174		0.580703
2.64905		0.620505
2.80007		0.656021
2.95045		0.695954
3.09392		0.738275
3.30345		0.78238
3.45446		0.826127
3.59919		0.863844
3.75209		0.901788
3.9031		0.945117
4.10068		0.990004
4.25547		1.03397
4.40775		1.07503
4.55813		1.11003
4.706		1.14951
4.85764		1.19212
5.059		1.2368
5.2119		1.27979
5.36354		1.32052
5.51078		1.35775
5.66306		1.39902
5.81722		1.44251
6.01354		1.48738
6.16896		1.53079
6.31745		1.56974
6.46343		1.60813
6.61948		1.65124
6.81706		1.69564
6.9643		1.73956
7.12161		1.78122
7.27325		1.81839
7.4249		1.85957
7.57654		1.90377
7.78041		1.94838
7.92765		1.99101
8.08055		2.0314
8.23094		2.06819
8.37881		2.1094
8.53045		2.15322
8.72929		2.19827
8.88345		2.24297
9.03635		2.2827
9.18296		2.32259
9.33146		2.36681
9.53659		2.40912
9.68697		2.45954
9.83736		2.50208
9.98774		2.51791
9.83925		2.50669
9.69012		2.46874
9.53596		2.42192
9.33397		2.38285
9.18925		2.34245
9.03509		2.30648
8.87715		2.27007
8.73054		2.22876
8.52479		2.18696
8.37629		2.14603
8.22842		2.10813
8.07552		2.07453
7.9245		2.03672
7.77475		1.99633
7.57654		1.95468
7.42364		1.91315
7.27073		1.87359
7.12664		1.83842
6.97059		1.79992
6.81958		1.75873
6.62074		1.71604
6.46721		1.6748
6.31934		1.6378
6.16833		1.60057
6.01291		1.55893
5.81407		1.51551
5.6662		1.47352
5.51015		1.43449
5.3604		1.39918
5.20624		1.35937
5.06151		1.31795
4.85953		1.27523
4.70915		1.2337
4.55939		1.19461
4.40963		1.16004
4.25484		1.12054
4.10257		1.07811
3.90059		1.03387
3.75146		0.99094
3.59667		0.95311
3.45635		0.915689
3.30093		0.873481
3.09769		0.830252
2.94668		0.788243
2.7944		0.749714
2.65094		0.714332
2.48923		0.674429
2.3445		0.631543
2.1356		0.587451
1.99277		0.544755
1.83923		0.505458
1.6964		0.470485
1.53783		0.431502
1.38745		0.389423
1.18358		0.345794
1.03508		0.302879
0.885954		0.26552
0.73368		0.22781
0.582036		0.185877
0.380683		0.140316
0.235961		0.098531
0.0818		0.062508
-0.02454		0.032356
-0.172409		-0.003665
-0.331603		-0.044183
-0.531069		-0.089085
-0.680196		-0.132132
-0.825548		-0.170558
-0.984742		-0.208554
-1.13072		-0.251571
-1.33396		-0.29424
-1.48435		-0.335838
-1.62655		-0.375645
-1.78386		-0.410907
-1.93551		-0.450426
-2.08715		-0.493333
-2.28599		-0.537277
-2.43511		-0.580536
-2.59242		-0.621089
-2.74218		-0.656954
-2.88942		-0.697149
-3.04295		-0.739889
-3.24745		-0.783405
-3.39091		-0.82653
-3.54381		-0.864153
-3.69672		-0.902895
-3.84962		-0.947293
-4.05538		-0.992235
-4.20262		-1.03565
-4.35237		-1.0765
-4.50465		-1.11221
-4.65692		-1.15276
-4.80856		-1.19506
-4.99985		-1.23928
-5.15653		-1.28149
-5.30502		-1.32211
-5.45793		-1.35898
-5.6102		-1.40025
-5.75744		-1.44396
-5.95628		-1.48966
-6.11107		-1.53368
-6.26397		-1.57256
-6.41121		-1.61132
-6.56285		-1.65515
-6.76861		-1.69946
-6.91522		-1.74281
-7.06686		-1.78358
-7.22228		-1.82035
-7.36952		-1.86229
-7.52117		-1.90727
-7.72063		-1.95251
-7.87291		-1.99645
-8.0277		-2.03751
-8.17116		-2.07396
-8.32532		-2.11374
-8.46564		-2.15755
-8.67832		-2.20324
-8.82619		-2.24813
-8.97909		-2.28767
-9.13199		-2.32701
-9.28426		-2.37055
-9.47996		-2.41386
-9.63223		-2.46516
-9.78828		-2.50814
-9.93615		-2.52373
-9.78073		-2.51197
-9.63852		-2.47292
-9.48247		-2.42635
-9.2786		-2.38778
-9.1301		-2.34788
-8.97972		-2.31205
-8.82556		-2.27565
-8.67706		-2.23412
-8.47634		-2.19194
-8.32155		-2.15084
-8.17305		-2.11282
-8.02266		-2.07922
-7.87668		-2.04099
-7.72189		-2.00027
-7.51676		-1.95846
-7.37015		-1.91747
-7.21473		-1.87905
-7.06498		-1.84405
-6.91522		-1.80464
-6.76043		-1.76178
-6.56411		-1.71876
-6.41373		-1.67741
-6.26082		-1.64105
-6.11295		-1.60436
-5.95879		-1.56289
-5.75996		-1.51969
-5.60957		-1.47828
-5.45793		-1.43914
-5.30377		-1.40402
-5.15527		-1.364
-5.00677		-1.32152
-4.80353		-1.27774
-4.64874		-1.23579
-4.50779		-1.19686
-4.3486		-1.16293
-4.19947		-1.12349
-4.04971		-1.08132
-3.85025		-1.03739
-3.69483		-0.994415
-3.54759		-0.956203
-3.39469		-0.91907
-3.24556		-0.877224
-3.04169		-0.833756
-2.89508		-0.791097
-2.74092		-0.751085
-2.58928		-0.715953
-2.44392		-0.677397
-2.29228		-0.635143
-2.08338		-0.591049
-1.93802		-0.547955
-1.78575		-0.50818
-1.63348		-0.473039
-1.48687		-0.433678
-1.33208		-0.391422
-1.13135		-0.348762
-0.983484		-0.305871
-0.826806		-0.267986
-0.681454		-0.229914
-0.525406		-0.190566
-0.327199		-0.14571
-0.177442		-0.090677
0.027057		-0.05968
0.026428		-0.044114
-0.074249			-0.116307
0.13025			-0.059172
0.385717			-0.000268
0.586441			0.056937
0.834357			0.120788
1.08919			0.182955
1.33396			0.247164
1.5372			0.307578
1.79015			0.368653
2.03744			0.433482
2.28913			0.499753
2.54397			0.559794
2.74406			0.619703
2.99261			0.681829
3.25122			0.745728
3.50229			0.809392
3.70175			0.870417
3.95155			0.93331
4.2045			0.998179
4.45997			1.06123
4.65944			1.12105
4.90924			1.18309
5.1603			1.24677
5.41199			1.30934
5.61398			1.37015
5.86504			1.43172
6.11233			1.49957
6.36465			1.56684
6.622			1.62995
6.82021			1.68938
7.07001			1.75251
7.32107			1.81599
7.57339			1.88065
7.77663			1.94042
8.02644			2.00454
8.27372			2.06853
8.53108			2.1338
8.73117			2.19444
8.97846			2.2595
9.23896			2.32317
9.48499			2.38763
9.68823			2.4475
9.93615			2.50874
10.1885			2.5748
10.4408			2.64222
10.6975			2.70356
10.8938			2.76506
11.1462			2.82848
11.3966			2.89352
11.6483			2.95691
11.8496			3.01736
12.1026			3.07975
12.3549			3.14388
12.6034			3.20675
12.8042			3.26739
13.0515			3.32829
13.3101			3.3962
13.563			3.46371
13.8103			3.52653
14.0079			3.58592
14.2665			3.64496
14.515			3.71741
14.7642			3.78499
14.9675			3.81315
14.763			3.7939
14.5194			3.73474
14.2678			3.669
14.0129			3.61535
13.8109			3.56184
13.5611			3.50559
13.3082			3.44606
13.0603			3.38501
12.8067			3.32866
12.6047			3.27272
12.3549			3.21495
12.0994			3.15576
11.8471			3.09818
11.6495			3.0433
11.3928			2.98515
11.1512			2.92476
10.8932			2.86538
10.6937			2.80826
10.4402			2.75117
10.1941			2.6883
9.93866			2.62583
9.68823			2.56718
9.49065			2.51107
9.23833			2.45081
8.97909			2.39061
8.72992			2.3293
8.5273			2.27308
8.27561			2.21149
8.02895			2.14888
7.776			2.08636
7.57339			2.02914
7.32359			1.96802
7.0719			1.9076
6.82084			1.84591
6.62074			1.78715
6.36968			1.72672
6.11484			1.6622
5.86189			1.59667
5.61272			1.53713
5.41011			1.47836
5.15841			1.4165
4.91113			1.35298
4.66069			1.29113
4.45871			1.23349
4.20639			1.17257
3.95722			1.10929
3.70049			1.04662
3.49977			0.98703
3.24808			0.924606
2.99953			0.861161
2.74469			0.798441
2.54775			0.73868
2.29605			0.679124
2.04248			0.613523
1.79015			0.548043
1.54413			0.486234
1.34026			0.42743
1.08605			0.364745
0.838132			0.301619
0.575744			0.236227
0.379425			0.17814
0.128992			0.118705
-0.076766			0.061483
-0.325311			0.003007
-0.529181			-0.054489
-0.777726			-0.119298
-1.02816			-0.182351
-1.28174			-0.245423
-1.48057			-0.304288
-1.73667			-0.364518
-1.98647			-0.430301
-2.23628			-0.497303
-2.48923			-0.558456
-2.69121			-0.617581
-2.94164			-0.680509
-3.19396			-0.744921
-3.44188			-0.807928
-3.64638			-0.867646
-3.89807			-0.932139
-4.14976			-0.996674
-4.40145			-1.06067
-4.5984			-1.12063
-4.85387			-1.18267
-5.10493			-1.24701
-5.35788			-1.31092
-5.55986			-1.37129
-5.80652			-1.43292
-6.06576			-1.49965
-6.31305			-1.56643
-6.55719			-1.62847
-6.76546			-1.68813
-7.01904			-1.75295
-7.26696			-1.81764
-7.52117			-1.88084
-7.72063			-1.94045
-7.97799			-2.00389
-8.22465			-2.06824
-8.47571			-2.13331
-8.6758			-2.19388
-8.92875			-2.25767
-9.18485			-2.32286
-9.42899			-2.38752
-9.63097			-2.4482
-9.88392			-2.51027
-10.1381			-2.57731
-10.3904			-2.64445
-10.6409			-2.70602
-10.8435			-2.76599
-11.0946			-2.83058
-11.3418			-2.89586
-11.5948			-2.95974
-11.7943			-3.01998
-12.0485			-3.08335
-12.2939			-3.1472
-12.5506			-3.21067
-12.7519			-3.26964
-13.0036			-3.33033
-13.2547			-3.39703
-13.5032			-3.46394
-13.7524			-3.52564
-13.9588			-3.5864
-14.213			-3.64686
-14.466			-3.7216
-14.712			-3.78829
-14.9196			-3.81601
-14.7126			-3.79624
-14.4672			-3.73672
-14.2105			-3.6694
-13.9575			-3.61741
-13.7575			-3.56419
-13.5095			-3.50983
-13.2566			-3.44969
-13.0005			-3.38773
-12.7557			-3.33096
-12.5512			-3.27668
-12.297			-3.21795
-12.0428			-3.15837
-11.7943			-3.09945
-11.5948			-3.04479
-11.3431			-2.98596
-11.0939			-2.92552
-10.8403			-2.86637
-10.6409			-2.81041
-10.3879			-2.7525
-10.1331			-2.68918
-9.88644			-2.625
-9.62971			-2.56571
-9.42836			-2.50944
-9.17981			-2.44983
-8.92875			-2.38885
-8.67643			-2.32903
-8.4713			-2.27249
-8.22276			-2.21137
-7.97295			-2.14938
-7.72063			-2.08815
-7.52431			-2.03058
-7.26633			-1.96903
-7.01401			-1.90601
-6.7642			-1.84502
-6.56474			-1.78713
-6.31619			-1.72761
-6.05821			-1.66286
-5.80904			-1.59747
-5.55609			-1.53673
-5.35788			-1.47828
-5.10304			-1.41473
-4.8545			-1.35123
-4.60469			-1.28906
-4.39705			-1.23111
-4.15102			-1.16804
-3.89744			-1.10558
-3.65204			-1.04346
-3.44754			-0.98582
-3.19459			-0.922351
-2.94038			-0.859161
-2.68995			-0.796507
-2.48545			-0.737784
-2.23691			-0.677018
-1.98522			-0.612096
-1.73352			-0.546023
-1.4875			-0.48698
-1.28237			-0.428034
-1.03319			-0.363785
-0.780872			-0.306033
-0.529181			-0.241848
-0.329716			-0.159272
0.027686			-0.11091
0.030832			-0.081756
-0.128992				-0.178678
0.178072				-0.102066
0.482618				-0.022022
0.79094				0.061458
1.13765				0.144161
1.44093				0.230196
1.74045				0.313935
2.0903				0.398628
2.39107				0.486706
2.74973				0.571102
3.04421				0.653314
3.34875				0.738349
3.70427				0.820179
4.00315				0.90648
4.30644				0.992082
4.66258				1.07475
4.95895				1.15994
5.26161				1.24663
5.61398				1.32955
5.91789				1.41514
6.21615				1.49981
6.56977				1.58214
6.87306				1.66784
7.1732				1.75174
7.52368				1.83606
7.83201				1.92669
8.17557				2.01309
8.47634				2.0976
8.78717				2.18263
9.13136				2.26477
9.43213				2.3502
9.73605				2.43652
10.0897				2.51806
10.3898				2.60334
10.6925				2.68856
11.0511				2.77153
11.3475				2.85711
11.647				2.94285
11.9944				3.02539
12.3027				3.11159
12.6034				3.1934
12.9602				3.27625
13.2597				3.36439
13.6077				3.44935
13.916				3.53197
14.2187				3.6177
14.5616				3.6994
14.8731				3.78435
15.1669				3.86842
15.5237				3.94857
15.8245				4.03138
16.1315				4.11542
16.4732				4.1951
16.7809				4.278
17.0823				4.36102
17.4365				4.44243
17.7367				4.52722
18.0356				4.60869
18.3867				4.69023
18.6862				4.7759
19.0411				4.85096
19.3444				4.94536
19.6451				5.02998
19.9962				5.06641
19.6458				5.04421
19.35				4.97118
19.0423				4.88585
18.6893				4.81993
18.3886				4.74468
18.0375				4.67199
17.7367				4.59908
17.441				4.52427
17.0823				4.45199
16.7803				4.3772
16.4776				4.30102
16.124				4.22872
15.8264				4.15352
15.5218				4.07741
15.1701				4.00314
14.8687				3.92588
14.5654				3.84775
14.2168				3.77365
13.9135				3.69441
13.6108				3.61771
13.2541				3.53915
12.9564				3.45689
12.606				3.37835
12.3027				3.30128
12.0013				3.22172
11.6495				3.14553
11.3481				3.06382
11.0474				2.98198
10.6937				2.90365
10.3923				2.82326
10.0897				2.74224
9.74297				2.66457
9.43339				2.58297
9.13577				2.50163
8.78088				2.42289
8.47759				2.33984
8.17871				2.25833
7.83075				2.17639
7.52054				2.08933
7.16943				2.0068
6.87117				1.92537
6.57166				1.84222
6.21615				1.76319
5.90783				1.68063
5.61586				1.59663
5.26412				1.51564
4.96084				1.4303
4.65944				1.34592
4.30266				1.26472
4.0063				1.18095
3.70364				1.09681
3.35253				1.01577
3.04672				0.930139
2.74973				0.847926
2.39358				0.764883
2.08841				0.677578
1.74045				0.593003
1.44219				0.50956
1.13953				0.423613
0.784648				0.339912
0.481989				0.25568
0.180589				0.175693
-0.12207				0.100715
-0.427875				0.020293
-0.731793				-0.064129
-1.07976				-0.147675
-1.38367				-0.233941
-1.67941				-0.317179
-2.0387				-0.402422
-2.34262				-0.492078
-2.68932				-0.576408
-2.98883				-0.658823
-3.29527				-0.744257
-3.64827				-0.825489
-3.95155				-0.910479
-4.25107				-0.996175
-4.60784				-1.07985
-4.90484				-1.16699
-5.20498				-1.25329
-5.55986				-1.33526
-5.86126				-1.42037
-6.16266				-1.50539
-6.51063				-1.58718
-6.80951				-1.67281
-7.11657				-1.75669
-7.47083				-1.84265
-7.77412				-1.93279
-8.11642				-2.01772
-8.42788				-2.10184
-8.72425				-2.18871
-9.08039				-2.27157
-9.38368				-2.35694
-9.68634				-2.4416
-10.0387				-2.52348
-10.337				-2.60906
-10.6396				-2.69442
-10.9939				-2.77771
-11.2921				-2.86377
-11.5979				-2.94974
-11.9434				-3.0317
-12.2504				-3.11654
-12.5456				-3.19901
-12.9023				-3.28344
-13.205				-3.37097
-13.5561				-3.45428
-13.8581				-3.53674
-14.1627				-3.62271
-14.5087				-3.70482
-14.8127				-3.78901
-15.1103				-3.87319
-15.4696				-3.9542
-15.7666				-4.03745
-16.0736				-4.11983
-16.421				-4.1997
-16.7287				-4.28313
-17.0213				-4.36755
-17.3818				-4.44786
-17.6801				-4.53111
-17.9802				-4.61266
-18.337				-4.69622
-18.6415				-4.78222
-18.9895				-4.85814
-19.2934				-4.95272
-19.5942				-5.03734
-19.9447				-5.07233
-19.5891				-5.04893
-19.2915				-4.9757
-18.9882				-4.89213
-18.6371				-4.82622
-18.3376				-4.74982
-17.9859				-4.67699
-17.6813				-4.60458
-17.3799				-4.52946
-17.025				-4.45657
-16.7306				-4.38072
-16.4247				-4.30581
-16.0768				-4.23374
-15.7628				-4.15726
-15.4683				-4.08065
-15.1191				-4.00736
-14.8146				-3.93
-14.5094				-3.85134
-14.1608				-3.77502
-13.8537				-3.69633
-13.5574				-3.62034
-13.2056				-3.54277
-12.9042				-3.46049
-12.5512				-3.38244
-12.2511				-3.30511
-11.9434				-3.22504
-11.5942				-3.14657
-11.2934				-3.06576
-10.9926				-2.98525
-10.6371				-2.90767
-10.3389				-2.82556
-10.0356				-2.74409
-9.68634				-2.66608
-9.38494				-2.5859
-9.07725				-2.50423
-8.72425				-2.42528
-8.42348				-2.34234
-8.12208				-2.26144
-7.77538				-2.17876
-7.46579				-2.09201
-7.11909				-2.00922
-6.81706				-1.92854
-6.51566				-1.845
-6.16644				-1.76432
-5.85938				-1.68137
-5.55168				-1.59874
-5.20561				-1.51843
-4.90421				-1.43425
-4.6091				-1.34928
-4.25044				-1.26785
-3.94967				-1.18302
-3.64197				-1.09854
-3.29653				-1.01787
-2.99387				-0.934265
-2.69058				-0.852132
-2.3357				-0.768586
-2.03304				-0.679856
-1.6813				-0.595959
-1.38493				-0.511869
-1.07724				-0.434741
-0.73368				-0.348403
-0.428505				-0.234076
0.030203				-0.16753
0.029574				-0.130495
-0.128363					-0.248042
0.176184					-0.152613
0.582666					-0.053146
0.989147					0.05252
1.38556					0.163387
1.79267					0.269107
2.18846					0.376834
2.59368					0.483503
2.99639					0.591119
3.40161					0.698136
3.80369					0.805885
4.20325					0.912998
4.61036					1.02109
5.01369					1.12885
5.41577					1.23691
5.81155					1.34626
6.21866					1.45398
6.61571					1.55708
6.97374					1.65899
7.37896					1.76191
7.7716					1.86935
8.17871					1.97797
8.58268					2.08529
8.97909					2.19319
9.38494					2.30188
9.79079					2.40956
10.1866					2.51764
10.5868					2.62438
10.9932					2.73149
11.3997					2.83859
11.7993					2.94586
12.2007					3.05184
12.6066					3.15829
13.0049					3.26676
13.4082					3.37336
13.8166					3.47529
14.1652					3.57605
14.5648					3.67637
14.9643					3.78045
15.3695					3.88656
15.7741					3.99193
16.1749					4.09622
16.5802					4.20115
16.9791					4.30525
17.3856					4.40992
17.7788					4.51333
18.186					4.61717
18.5893					4.71948
18.9914					4.82201
19.3997					4.92339
19.793					5.02715
20.1982					5.12759
20.6016					5.22627
20.9533					5.32334
21.3529					5.42166
21.7625					5.52145
22.1671					5.62418
22.5629					5.72393
22.9675					5.8247
23.3664					5.92375
23.7722					6.01756
24.1731					6.13308
24.5827					6.23703
24.9804					6.284
24.5726					6.25556
24.1768					6.1676
23.7773					6.06707
23.3746					5.9857
22.9706					5.8979
22.5666					5.80915
22.1621					5.72178
21.7581					5.63104
21.3598					5.54342
20.9514					5.457
20.6028					5.37184
20.2001					5.2837
19.7905					5.19272
19.3953					5.09783
18.9951					5.00548
18.5899					4.91141
18.1872					4.81774
17.782					4.72255
17.3856					4.62865
16.9816					4.53426
16.5795					4.43883
16.1775					4.34133
15.7729					4.24392
15.3658					4.14503
14.9681					4.04553
14.5648					3.94732
14.1627					3.85328
13.8078					3.75893
13.4095					3.66347
13.0068					3.56425
12.6016					3.46288
12.2014					3.3617
11.7949					3.26107
11.3985					3.15839
10.9958					3.0568
10.5975					2.95444
10.1885					2.85251
9.78828					2.74937
9.38998					2.64756
8.98035					2.54432
8.58016					2.44141
8.1806					2.33709
7.77789					2.23133
7.37141					2.12726
6.97185					2.0269
6.61948					1.92682
6.21741					1.82631
5.8147					1.72171
5.41325					1.61538
5.01055					1.51026
4.61036					1.40513
4.2108					1.29906
3.80054					1.19362
3.40161					1.08563
2.99387					0.978593
2.59305					0.8713
2.19223					0.765194
1.7889					0.658265
1.3906					0.553468
0.984113					0.443547
0.582036					0.339495
0.179959					0.239017
-0.125216					0.142432
-0.529181					0.042858
-0.93					-0.062226
-1.33145					-0.172932
-1.73227					-0.279328
-2.13686					-0.38757
-2.53768					-0.493735
-2.94416					-0.600823
-3.34372					-0.707562
-3.74894					-0.81539
-4.1548					-0.923019
-4.55561					-1.03234
-4.95014					-1.14104
-5.36417					-1.24948
-5.75933					-1.35833
-6.16266					-1.46555
-6.55782					-1.56861
-6.92025					-1.67084
-7.3173					-1.77322
-7.71937					-1.88028
-8.12271					-1.9895
-8.52164					-2.09808
-8.92875					-2.20604
-9.32957					-2.31449
-9.73605					-2.42203
-10.135					-2.52988
-10.5427					-2.63597
-10.9417					-2.74237
-11.3418					-2.84848
-11.7439					-2.95587
-12.1491					-3.063
-12.5506					-3.16972
-12.9457					-3.27755
-13.356					-3.38314
-13.7568					-3.48442
-14.1098					-3.58504
-14.5062					-3.68627
-14.9146					-3.79077
-15.3148					-3.89728
-15.7188					-4.00173
-16.1202					-4.10594
-16.5248					-4.21134
-16.93					-4.31592
-17.3334					-4.41995
-17.7348					-4.52314
-18.1363					-4.62654
-18.5352					-4.729
-18.9398					-4.83149
-19.3406					-4.93319
-19.7477					-5.0372
-20.1473					-5.13843
-20.5462					-5.23636
-20.9011					-5.33291
-21.2988					-5.431
-21.7015					-5.53057
-22.0985					-5.63305
-22.5081					-5.73223
-22.9121					-5.83219
-23.3135					-5.93177
-23.7137					-6.02557
-24.1171					-6.14187
-24.5235					-6.24682
-24.92					-6.29375
-24.5217					-6.26457
-24.1208					-6.17605
-23.7131					-6.07425
-23.3142					-5.99401
-22.9115					-5.90691
-22.5081					-5.81845
-22.1105					-5.73033
-21.7015					-5.63954
-21.2994					-5.55166
-20.9023					-5.46567
-20.5412					-5.38024
-20.1435					-5.29233
-19.7458					-5.20116
-19.3419					-5.10626
-18.9436					-5.0134
-18.5314					-4.91898
-18.1312					-4.82482
-17.7317					-4.73008
-17.3365					-4.63537
-16.9244					-4.54003
-16.5267					-4.44436
-16.1271					-4.34695
-15.7175					-4.25005
-15.3167					-4.15274
-14.9152					-4.05376
-14.5094					-3.95604
-14.1123					-3.8607
-13.7593					-3.76567
-13.3554					-3.67082
-12.9539					-3.57175
-12.5594					-3.47005
-12.1485					-3.36932
-11.7408					-3.26798
-11.345					-3.16647
-10.9435					-3.06517
-10.5396					-2.96286
-10.1381					-2.86068
-9.73479					-2.75746
-9.3302					-2.65384
-8.92875					-2.5503
-8.52542					-2.44742
-8.12271					-2.34454
-7.72378					-2.23941
-7.31541					-2.13512
-6.91711					-2.03398
-6.56159					-1.93397
-6.1677					-1.83342
-5.76059					-1.72974
-5.35473					-1.62448
-4.95643					-1.52037
-4.55373					-1.4154
-4.15102					-1.30898
-3.74831					-1.20227
-3.34624					-1.09597
-2.93661					-0.989717
-2.54208					-0.882782
-2.14126					-0.776836
-1.73541					-0.668916
-1.33333					-0.571647
-0.930629					-0.462309
-0.531698					-0.319687
0.023281					-0.236122
0.026428					-0.188411
-0.174925						-0.321596
0.230927						-0.201068
0.734939						-0.075791
1.18484						0.049668
1.69074						0.181424
2.14378						0.308128
2.64276						0.436372
3.09958						0.565711
3.60296						0.698043
4.10194						0.830341
4.55813						0.960904
5.05396						1.08907
5.51645						1.21771
6.01794						1.34785
6.46658						1.475
6.97185						1.60545
7.4249						1.73322
7.92639						1.86427
8.37566						1.99156
8.88596						2.1221
9.33775						2.24938
9.83925						2.38013
10.2929						2.50793
10.7982						2.63585
11.2512						2.76501
11.7502						2.89561
12.2517						3.02548
12.7035						3.1544
13.2088						3.28145
13.6574						3.40839
14.1633						3.53696
14.617						3.66177
15.1222						3.7889
15.5677						3.91302
16.0749						4.03923
16.5248						4.16282
17.0269						4.28872
17.4869						4.41183
17.9865						4.53696
18.4364						4.65904
18.9379						4.78122
19.396						4.90536
19.8975						5.03039
20.4002						5.15418
20.8526						5.27542
21.351						5.39513
21.8059						5.51429
22.3143						5.63588
22.763						5.75418
23.2708						5.87501
23.7219						5.99187
24.2247						6.111
24.679						6.2266
25.1798						6.34475
25.6322						6.46026
26.1337						6.57605
26.583						6.69233
27.0914						6.8096
27.591						6.927
28.0397						7.04306
28.5462						7.15041
28.9992						7.28211
29.5052						7.40196
29.9544						7.45462
29.5014						7.42326
28.9992						7.32427
28.5494						7.21169
28.0435						7.12245
27.5904						7.02364
27.0851						6.92284
26.5862						6.82075
26.1331						6.71957
25.6322						6.61824
25.1786						6.51702
24.6733						6.41228
24.2203						6.30933
23.72						6.20205
23.2682						6.09741
22.7623						5.98958
22.3112						5.88442
21.8034						5.77453
21.3566						5.66656
20.8583						5.55704
20.4021						5.44584
19.8962						5.33207
19.3979						5.21755
18.9473						5.10247
18.4383						4.98923
17.989						4.87595
17.4875						4.76018
17.0326						4.64708
16.5267						4.53035
16.0774						4.41477
15.5684						4.29492
15.1128						4.17734
14.6132						4.05758
14.1664						3.94079
13.658						3.82
13.2062						3.70099
12.7085						3.58135
12.2504						3.45922
11.7458						3.33544
11.2493						3.21057
10.7976						3.08736
10.2835						2.96516
9.84239						2.84271
9.33209						2.71683
8.87967						2.59461
8.37944						2.46948
7.9245						2.34744
7.42175						2.22108
6.97059						2.09815
6.47098						1.97179
6.01731						1.84779
5.51582						1.71877
5.06088						1.59329
4.55939						1.46725
4.10635						1.33934
3.60485						1.20933
3.0958						1.07946
2.64339						0.950559
2.14126						0.824175
1.69325						0.697387
1.18358						0.565897
0.733051						0.440264
0.232185						0.314249
-0.173038						0.191781
-0.678308						0.065318
-1.13009						-0.060732
-1.63285						-0.19174
-2.08589						-0.3187
-2.5899						-0.447041
-3.04547						-0.577373
-3.54256						-0.708321
-4.05097						-0.840805
-4.50779						-0.971742
-5.00488						-1.10119
-5.45919						-1.22881
-5.95879						-1.35972
-6.41687						-1.48726
-6.91333						-1.61825
-7.36764						-1.74462
-7.87039						-1.87548
-8.32155						-2.00313
-8.83122						-2.13477
-9.27986						-2.26226
-9.78765						-2.3935
-10.2388						-2.52132
-10.7397						-2.64946
-11.1946						-2.77753
-11.6967						-2.9074
-12.1963						-3.03711
-12.6538						-3.16646
-13.1528						-3.29279
-13.6077						-3.41869
-14.1142						-3.54713
-14.5578						-3.67246
-15.0612						-3.7991
-15.5187						-3.92251
-16.0214						-4.04846
-16.4707						-4.1723
-16.969						-4.29777
-17.4309						-4.41973
-17.9292						-4.54431
-18.3854						-4.66771
-18.8901						-4.79028
-19.3406						-4.91475
-19.844						-5.03865
-20.3442						-5.16269
-20.7985						-5.2842
-21.2994						-5.40418
-21.7568						-5.52247
-22.2571						-5.64465
-22.712						-5.76253
-23.216						-5.88305
-23.6659						-5.99983
-24.1636						-6.11993
-24.6211						-6.2356
-25.1226						-6.35371
-25.5718						-6.46788
-26.0784						-6.58344
-26.5258						-6.70012
-27.0342						-6.81794
-27.5338						-6.93444
-27.9856						-7.05036
-28.4852						-7.15721
-28.9426						-7.28999
-29.4504						-7.40971
-29.899						-7.46302
-29.451						-7.43266
-28.9451						-7.33301
-28.4877						-7.21827
-27.9856						-7.1288
-27.5325						-7.02999
-27.0329						-6.9301
-26.5283						-6.82823
-26.0784						-6.72672
-25.5756						-6.62546
-25.1169						-6.5245
-24.6142						-6.41887
-24.1693						-6.31595
-23.6634						-6.20907
-23.2129						-6.10467
-22.717						-5.99558
-22.2558						-5.88966
-21.7562						-5.77989
-21.3044						-5.67266
-20.801						-5.56238
-20.3436						-5.45009
-19.8471						-5.3357
-19.3406						-5.22211
-18.88						-5.10768
-18.3835						-4.99419
-17.9292						-4.88049
-17.4328						-4.76558
-16.9791						-4.6514
-16.4763						-4.53445
-16.0183						-4.41834
-15.5205						-4.3002
-15.0637						-4.18411
-14.5629						-4.06445
-14.1092						-3.94644
-13.6064						-3.82633
-13.1521						-3.70695
-12.6469						-3.58747
-12.2001						-3.46497
-11.6955						-3.3426
-11.1946						-3.21866
-10.7384						-3.09536
-10.2382						-2.97235
-9.7845						-2.85097
-9.28301						-2.72548
-8.8287						-2.60325
-8.32029						-2.47638
-7.87479						-2.35411
-7.36764						-2.22892
-6.91774						-2.1071
-6.41435						-1.97945
-5.95628						-1.85578
-5.45793						-1.72865
-5.00425						-1.60368
-4.50339						-1.47735
-4.04908						-1.34974
-3.54381						-1.22019
-3.04924						-1.09139
-2.5899						-0.962268
-2.09093						-0.833878
-1.63474						-0.719049
-1.13576						-0.587553
-0.676421						-0.413602
0.028315						-0.309382
0.030203						-0.249361
-0.230298							-0.404198
0.279377							-0.260111
0.835615							-0.116286
1.38808							0.033444
1.93802							0.188894
2.54397							0.344206
3.09455							0.499411
3.65078							0.651208
4.20388							0.800648
4.76578							0.951191
5.30502							1.1019
5.8663							1.25099
6.4175							1.40305
6.96933							1.55801
7.57843							1.71449
8.13026							1.86965
8.67958							2.02217
9.23644							2.17181
9.79017							2.32365
10.3483							2.47158
10.8945							2.62248
11.4482							2.77561
12.0497							2.93038
12.6016							3.08348
13.1553							3.23354
13.7115							3.38081
14.2678							3.53024
14.8108							3.67546
15.3702							3.82374
15.9258							3.97371
16.5286							4.12468
17.081							4.27335
17.6348							4.41879
18.1834							4.56137
18.7409							4.7062
19.2972							4.8494
19.8452							4.99075
20.4002							5.13364
20.9565							5.27874
21.5624							5.42399
22.1086							5.5671
22.6654							5.70641
23.2166							5.84326
23.7697							5.98148
24.3241							6.11726
24.8803							6.25469
25.4296							6.39399
26.0343							6.53405
26.5862							6.67223
27.143							6.80589
27.6917							6.93662
28.2486							7.0685
28.8023							7.19855
29.3516							7.3304
29.9028							7.46398
30.5125							7.59785
31.0631							7.73023
31.6194							7.85889
32.1674							7.98558
32.7167							8.11271
33.2723							8.23086
33.8279							8.37619
34.3766							8.50643
34.936							8.5664
34.3817							8.53407
33.8286							8.42909
33.2786							8.30627
32.7186							8.20907
32.1718							8.1027
31.6156							7.9964
31.0625							7.88743
30.51							7.77367
29.906							7.65794
29.3548							7.54117
28.7979							7.4264
28.2442							7.31272
27.6936							7.19609
27.1386							7.08037
26.5811							6.96136
26.0375							6.83747
25.4315							6.71185
24.8759							6.58482
24.3209							6.46008
23.7779							6.33704
23.2192							6.21143
22.6698							6.08711
22.1111							5.95976
21.5586							5.82759
20.9577							5.6943
20.4109							5.56024
19.8465							5.42794
19.2915							5.29649
18.7397							5.16336
18.1916							5.02885
17.6423							4.89661
17.0836							4.76098
16.5248							4.62219
15.9258							4.4806
15.3695							4.33971
14.8177							4.19955
14.2684							4.06208
13.7115							3.92085
13.1597							3.78249
12.6034							3.64063
12.0504							3.49517
11.4444							3.34771
10.8945							3.2021
10.3451							3.05825
9.78765							2.91749
9.23644							2.77233
8.67958							2.62908
8.12649							2.48238
7.57402							2.3331
6.975							2.18104
6.42002							2.03114
5.86504							1.88323
5.3132							1.73882
4.762							1.59128
4.20702							1.44381
3.65582							1.29693
3.09643							1.14787
2.53894							0.993976
1.9418							0.840016
1.38808							0.683997
0.836874							0.534646
0.280007							0.390149
-0.225264							0.245152
-0.780243							0.10071
-1.33333							-0.048702
-1.8858							-0.2052
-2.49112							-0.360625
-3.03917							-0.516761
-3.5973							-0.669033
-4.15039							-0.819318
-4.70726							-0.970569
-5.25972							-1.12147
-5.80778							-1.26976
-6.3615							-1.42211
-6.91459							-1.57664
-7.52368							-1.73308
-8.06985							-1.88805
-8.62546							-2.04064
-9.17793							-2.18996
-9.72976							-2.34236
-10.2885							-2.49002
-10.8366							-2.64062
-11.3909							-2.79374
-11.9937							-2.94829
-12.5474							-3.10052
-13.098							-3.25057
-13.6593							-3.39692
-14.2092							-3.54655
-14.7579							-3.69182
-15.3186							-3.8399
-15.8717							-3.99038
-16.477							-4.14179
-17.0263							-4.29017
-17.5813							-4.4359
-18.1318							-4.57719
-18.6849							-4.7213
-19.2399							-4.86451
-19.7899							-5.00589
-20.3499							-5.14808
-20.8979							-5.29315
-21.5007							-5.43739
-22.0519							-5.58079
-22.6094							-5.72038
-23.1575							-5.85749
-23.715							-5.99506
-24.2681							-6.12994
-24.8193							-6.26614
-25.3793							-6.40607
-25.9758							-6.54588
-26.5308							-6.68469
-27.087							-6.8187
-27.6294							-6.94978
-28.1838							-7.08171
-28.7432							-7.21179
-29.3019							-7.34264
-29.85							-7.47707
-30.4521							-7.61079
-31.0033							-7.74345
-31.5577							-7.8722
-32.1095							-7.99844
-32.6614							-8.12522
-33.2239							-8.24361
-33.7701							-8.38869
-34.3282							-8.51958
-34.88							-8.57961
-34.3238							-8.54647
-33.7688							-8.44148
-33.217							-8.31883
-32.6689							-8.22121
-32.1108							-8.11524
-31.5583							-8.00796
-31.0052							-7.89784
-30.4534							-7.78395
-29.8468							-7.66817
-29.2988							-7.55112
-28.74							-7.43637
-28.1844							-7.32194
-27.6319							-7.20558
-27.0814							-7.08914
-26.5346							-6.96976
-25.979							-6.84612
-25.3806							-6.72034
-24.8187							-6.59345
-24.2662							-6.46948
-23.72							-6.34576
-23.1619							-6.22046
-22.612							-6.09568
-22.0545							-5.968
-21.497							-5.83578
-20.8986							-5.7021
-20.3423							-5.56722
-19.7918							-5.43537
-19.2405							-5.30431
-18.6862							-5.17177
-18.1274							-5.03738
-17.5882							-4.90447
-17.0263							-4.76809
-16.4701							-4.62892
-15.8679							-4.4865
-15.3135							-4.3459
-14.763							-4.2068
-14.2055							-4.07048
-13.6574							-3.9301
-13.1056							-3.79204
-12.5481							-3.64982
-11.9925							-3.50558
-11.3972							-3.35845
-10.8435							-3.21289
-10.2835							-3.06854
-9.73102							-2.92715
-9.18107							-2.78225
-8.62483							-2.63992
-8.06671							-2.49379
-7.52306							-2.34557
-6.90893							-2.19421
-6.3615							-2.04421
-5.80967							-1.89668
-5.25532							-1.75234
-4.706							-1.60444
-4.14724							-1.45756
-3.59478							-1.31083
-3.04547							-1.16169
-2.49049							-1.00636
-1.88517							-0.866393
-1.33396							-0.708513
-0.778356							-0.504614
0.030203							-0.384925
0.029574							-0.313155
-0.280636								-0.478822
0.327828								-0.308831
0.991664								-0.137755
1.59887								0.036249
2.24257								0.212127
2.89382								0.386243
3.49725								0.561311
4.15542								0.738174
4.81234								0.915429
5.46107								1.09114
6.06639								1.26484
6.71701								1.43812
7.37519								1.61137
7.97484								1.78853
8.62672								1.96277
9.28741								2.13942
9.88833								2.31596
10.5515								2.49242
11.1996								2.66774
11.8559								2.84176
12.4499								3.01428
13.1056								3.18681
13.7612								3.35841
14.3697								3.53051
15.0178								3.70322
15.6716								3.87749
16.3253								4.04938
16.9306								4.21872
17.5838								4.386
18.2407								4.55179
18.8435								4.71635
19.4922								4.88201
20.1517								5.04885
20.8042								5.21479
21.4051								5.37862
22.0633								5.5408
22.7114								5.70104
23.3198								5.86318
23.973								6.02004
24.6211								6.17583
25.227								6.33181
25.8802								6.48842
26.5364								6.64514
27.1896								6.80045
27.7936								6.95432
28.4506								7.10791
29.1006								7.25985
29.7052								7.41044
30.3571								7.55942
31.014								7.70768
31.6678								7.85408
32.2662								7.99958
32.925								8.14386
33.5819								8.28741
34.1747								8.43291
34.8379								8.5751
35.4897								8.71616
36.0919								8.85704
36.7394								8.99686
37.3932								9.13611
38.0526								9.26548
38.6604								9.42289
39.3098								9.56524
39.9692								9.63204
39.3129								9.59934
38.6592								9.48829
38.0557								9.35751
37.4026								9.252
36.7444								9.13542
36.0913								9.01838
35.4885								8.90031
34.8341								8.78111
34.1809								8.66053
33.5825								8.53677
32.9256								8.41384
32.2656								8.28926
31.6665								8.16225
31.0109								8.03218
30.3622								7.89933
29.7015								7.76507
29.1031								7.62904
28.4487								7.49276
27.7936								7.35662
27.194								7.21892
26.5371								7.07891
25.8814								6.93674
25.2346								6.7933
24.6242								6.64923
23.9749								6.50404
23.3167								6.35715
22.7101								6.2069
22.0601								6.05852
21.4076								5.90876
20.8036								5.75812
20.1492								5.60547
19.4966								5.45154
18.8448								5.29689
18.2382								5.14124
17.5832								4.98485
16.9363								4.8271
16.3241								4.66678
15.6728								4.50535
15.0178								4.34305
14.3665								4.1818
13.7619								4.02125
13.1075								3.85985
12.4524								3.69711
11.8452								3.53314
11.1996								3.36642
10.5421								3.1977
9.8921								3.02873
9.28615								2.86012
8.62924								2.69291
7.97925								2.52671
7.37267								2.35702
6.72645								2.19022
6.06702								2.02167
5.46107								1.85093
4.81297								1.67811
4.15605								1.50417
3.5004								1.33063
2.90011								1.15751
2.24068								0.985513
1.5888								0.811504
0.987259								0.639704
0.331603								0.469491
-0.276861								0.298844
-0.930629								0.12728
-1.53595								-0.046719
-2.18594								-0.223302
-2.84223								-0.399203
-3.44565								-0.575631
-4.10068								-0.751907
-4.75382								-0.928707
-5.4057								-1.10469
-6.01354								-1.27937
-6.66353								-1.45417
-7.31856								-1.62849
-7.92576								-1.80672
-8.57827								-1.98178
-9.22701								-2.15663
-9.83169								-2.33166
-10.4873								-2.50808
-11.1417								-2.6845
-11.7961								-2.85862
-12.4002								-3.03006
-13.0515								-3.20077
-13.7033								-3.37254
-14.3118								-3.54524
-14.9599								-3.71832
-15.6206								-3.89231
-16.2712								-4.06381
-16.874								-4.2321
-17.5259								-4.39815
-18.1822								-4.56343
-18.7881								-4.7293
-19.4444								-4.89537
-20.0963								-5.06146
-20.7463								-5.22642
-21.3491								-5.38979
-22.0029								-5.55276
-22.6604								-5.71358
-23.2626								-5.87528
-23.9151								-6.03204
-24.5676								-6.18826
-25.1729								-6.34367
-25.8223								-6.5001
-26.4786								-6.65707
-27.1311								-6.81316
-27.7351								-6.96624
-28.3939								-7.11802
-29.0464								-7.26868
-29.6518								-7.41928
-30.3018								-7.569
-30.9524								-7.71816
-31.6131								-7.86509
-32.2102								-8.01014
-32.8627								-8.15394
-33.5228								-8.29715
-34.118								-8.44294
-34.7781								-8.58589
-35.4331								-8.72759
-36.0334								-8.86769
-36.6872								-9.00741
-37.3422								-9.14739
-37.9972								-9.27748
-38.6								-9.43533
-39.2544								-9.57806
-39.9101								-9.64462
-39.2563								-9.6117
-38.6013								-9.49978
-37.9934								-9.36844
-37.3416								-9.26287
-36.6928								-9.14632
-36.0416								-9.02804
-35.4356								-8.9088
-34.78								-8.78905
-34.1205								-8.6689
-33.524								-8.54502
-32.8665								-8.42162
-32.2096								-8.29651
-31.6087								-8.16924
-30.9555								-8.03797
-30.3024								-7.90436
-29.6455								-7.77001
-29.042								-7.63521
-28.3902								-7.49929
-27.7358								-7.36202
-27.133								-7.22338
-26.483								-7.08305
-25.8235								-6.94102
-25.1717								-6.79787
-24.567								-6.65312
-23.9176								-6.50746
-23.2626								-6.36126
-22.6591								-6.21051
-22.0041								-6.06202
-21.3485								-5.91282
-20.7501								-5.76274
-20.0988								-5.60955
-19.4388								-5.45391
-18.7888								-5.29824
-18.1809								-5.14313
-17.5316								-4.98787
-16.8746								-4.83132
-16.27								-4.67156
-15.6137								-4.51031
-14.9624								-4.34778
-14.3124								-4.18642
-13.7065								-4.0253
-13.0565								-3.86477
-12.3977								-3.70231
-11.7936								-3.53777
-11.1405								-3.3713
-10.4867								-3.20357
-9.83862								-3.03551
-9.22889								-2.86836
-8.58016								-2.70162
-7.92199								-2.53528
-7.31856								-2.36517
-6.66605								-2.19809
-6.01542								-2.03003
-5.40759								-1.86039
-4.75256								-1.68877
-4.10068								-1.51459
-3.44691								-1.34037
-2.83782								-1.16549
-2.18405								-1.01099
-1.5372								-0.834504
-0.933146								-0.596698
0.031461								-0.456705
0.025798								-0.372312

## Sheet: Sr25
	Polarisation (μC.cm-2)
Electric Field (kV.cm-1)	5 kV.cm-1	10 kV.cm-1	15 kV.cm-1	20 kV.cm-1	25 kV.cm-1	30 kV.cm-1	35 kV.cm-1	40 kV.cm-1
-0.028567	-0.325753
0.08361	-0.306028
0.19927	-0.286133
0.305873	-0.266128
0.42641	-0.246297
0.538586	-0.226465
0.645189	-0.206346
0.762939	-0.185606
0.870935	-0.16354
0.980325	-0.141509
1.08971	-0.119729
1.21025	-0.098443
1.31337	-0.07634
1.42694	-0.053961
1.53424	-0.03089
1.64851	-0.00762
1.7572	0.015785
1.87007	0.039603
1.98155	0.063406
2.08955	0.087406
2.20451	0.112068
2.3139	0.13724
2.42956	0.162345
2.54243	0.187041
2.64416	0.212398
2.75843	0.238131
2.87618	0.264215
2.98139	0.290429
3.09217	0.316924
3.21131	0.344083
3.31722	0.371587
3.4287	0.399016
3.54157	0.426533
3.65027	0.454821
3.76871	0.483484
3.87671	0.511719
3.99167	0.540102
4.10176	0.569412
4.21184	0.599274
4.32541	0.629145
4.43062	0.658777
4.54837	0.688663
4.65707	0.71807
4.77342	0.752164
4.8849	0.784232
4.9929	0.806176
4.88142	0.814229
4.76855	0.810673
4.65637	0.804022
4.55046	0.801361
4.4362	0.797408
4.32123	0.792974
4.21463	0.787638
4.10106	0.781381
3.9854	0.774849
3.87671	0.768096
3.7722	0.759902
3.65514	0.751715
3.54784	0.742982
3.4287	0.734308
3.31792	0.724993
3.20644	0.715165
3.10053	0.704718
2.98557	0.694317
2.86921	0.683474
2.75912	0.672557
2.64695	0.661258
2.53686	0.649982
2.42538	0.637072
2.31181	0.623443
2.20521	0.609645
2.09094	0.596515
1.98364	0.583126
1.87077	0.569242
1.75581	0.554741
1.64642	0.539635
1.53633	0.524335
1.42485	0.508775
1.31616	0.493008
1.20886	0.477549
1.0925	0.461374
0.986596	0.444139
0.871632	0.426578
0.754578	0.408726
0.649369	0.39137
0.535799	0.373532
0.42223	0.35537
0.31075	0.336956
0.19927	0.318813
0.089184	0.299244
-0.025083	0.279646
-0.137956	0.259112
-0.251526	0.239282
-0.365793	0.218746
-0.473789	0.198337
-0.584572	0.177733
-0.700232	0.156979
-0.808925	0.135695
-0.917618	0.113936
-1.03398	0.091232
-1.13918	0.068983
-1.25554	0.046852
-1.36284	0.024774
-1.4792	0.002319
-1.58928	-0.021575
-1.70007	-0.045547
-1.80667	-0.070054
-1.91815	-0.093651
-2.03311	-0.117679
-2.14459	-0.1418
-2.25398	-0.166635
-2.36616	-0.191933
-2.47833	-0.218084
-2.58633	-0.243822
-2.70338	-0.269807
-2.81626	-0.295349
-2.92286	-0.321563
-3.03295	-0.348011
-3.14791	-0.375473
-3.25939	-0.402689
-3.37296	-0.430931
-3.48374	-0.458745
-3.59522	-0.486533
-3.70322	-0.514168
-3.81609	-0.542853
-3.92618	-0.572176
-4.03417	-0.602127
-4.14635	-0.631735
-4.26689	-0.660919
-4.3721	-0.69089
-4.48218	-0.721038
-4.60481	-0.750493
-4.71002	-0.784308
-4.81941	-0.816447
-4.93576	-0.838008
-4.81941	-0.846046
-4.71002	-0.842904
-4.59575	-0.837342
-4.48636	-0.834682
-4.36374	-0.830943
-4.25922	-0.825954
-4.14983	-0.820906
-4.03835	-0.815109
-3.93036	-0.808716
-3.81679	-0.801659
-3.7067	-0.794171
-3.59452	-0.786502
-3.48862	-0.778263
-3.37156	-0.769254
-3.26009	-0.760068
-3.1507	-0.750416
-3.03643	-0.740578
-2.92216	-0.729912
-2.81626	-0.719084
-2.70129	-0.70814
-2.58981	-0.697085
-2.48042	-0.685241
-2.36546	-0.673107
-2.25816	-0.660713
-2.1425	-0.647566
-2.03102	-0.634033
-1.91884	-0.620068
-1.81155	-0.605923
-1.70494	-0.592313
-1.58441	-0.5779
-1.4792	-0.562566
-1.36423	-0.54698
-1.25066	-0.531069
-1.14545	-0.515416
-1.03119	-0.499214
-0.917618	-0.482676
-0.804048	-0.46569
-0.698839	-0.448525
-0.579695	-0.43068
-0.472395	-0.412189
-0.358129	-0.396223
-0.250133	-0.378172
-0.140743	-0.351993
0.03205	-0.335716
0.029263	-0.325392
-0.02996		-0.654139
0.080126		-0.628335
0.256403		-0.60041
0.425713		-0.572209
0.592236		-0.544182
0.705109		-0.518348
0.874419		-0.490925
1.03258		-0.461406
1.20468		-0.429328
1.37259		-0.396429
1.53703		-0.364822
1.70355		-0.335437
1.81364		-0.306709
1.98225		-0.277105
2.15086		-0.244991
2.31738		-0.211263
2.48182		-0.178851
2.64904		-0.144609
2.81417		-0.11099
2.98905		-0.079201
3.09635		-0.04762
3.26705		-0.014814
3.43218		0.01997
3.6008		0.056405
3.76941		0.091051
3.93175		0.12737
4.09967		0.163015
4.2634		0.197395
4.37837		0.231632
4.55046		0.266695
4.71629		0.303566
4.88142		0.341908
5.04376		0.380091
5.21446		0.417066
5.38029		0.452811
5.49525		0.488104
5.6569		0.524593
5.8283		0.56318
5.99343		0.604
6.16274		0.644415
6.32369		0.686595
6.49509		0.726966
6.66718		0.764677
6.7703		0.801123
6.9424		0.838992
7.10544		0.879782
7.27196		0.923119
7.43779		0.965111
7.60849		1.00913
7.77432		1.0517
7.94224		1.09238
8.0579		1.13255
8.22302		1.17379
8.38537		1.21649
8.55607		1.26083
8.72399		1.30523
8.88912		1.34835
9.05912		1.39045
9.16573		1.43261
9.33503		1.47622
9.50086		1.52023
9.66669		1.57174
9.83391		1.61847
10.0046		1.64994
9.83182		1.66107
9.66947		1.65618
9.49877		1.64586
9.33573		1.64222
9.16851		1.63858
9.05424		1.63501
8.88842		1.6302
8.71981		1.62286
8.5505		1.61339
8.39303		1.60272
8.22093		1.59257
8.05023		1.58392
7.94224		1.57599
7.77641		1.56733
7.60919		1.55631
7.44476		1.54333
7.27196		1.53111
7.10962		1.5158
6.93892		1.50144
6.77518		1.48884
6.6644		1.47727
6.49857		1.46454
6.32648		1.44967
6.15995		1.43241
5.99273		1.41699
5.82621		1.39953
5.6562		1.38286
5.49177		1.36751
5.38308		1.35222
5.21516		1.33544
5.05073		1.31653
4.88212		1.29602
4.71281		1.27547
4.54419		1.2562
4.38046		1.23937
4.26758		1.22253
4.09618		1.20422
3.93384		1.18323
3.76802		1.16014
3.60289		1.13787
3.43149		1.11365
3.26218		1.09051
3.09426		1.06926
2.9779		1.04916
2.81556		1.02862
2.65252		1.00616
2.48461		0.981721
2.32017		0.957773
2.14668		0.930868
1.98434		0.905086
1.81573		0.881149
1.7147		0.857987
1.53633		0.834363
1.36911		0.808338
1.20607		0.78079
1.03746		0.752792
0.865361		0.725733
0.699535		0.700433
0.588056		0.676174
0.423623		0.649366
0.256403		0.62144
0.089184		0.592929
-0.02578		0.566777
-0.19718		0.538518
-0.361612		0.510266
-0.528135		0.482398
-0.638918		0.456103
-0.805441		0.427824
-0.976144		0.39718
-1.14127		0.364235
-1.31267		0.331489
-1.47571		0.300008
-1.64154		0.270558
-1.7565		0.241604
-1.91675		0.211629
-2.08955		0.179262
-2.25119		0.145279
-2.4205		0.112616
-2.58981		0.077433
-2.75216		0.043317
-2.92634		0.010677
-3.03852		-0.021535
-3.20783		-0.054023
-3.36599		-0.088433
-3.53948		-0.12433
-3.70182		-0.159028
-3.87113		-0.195969
-4.03417		-0.232148
-4.20906		-0.266483
-4.32054		-0.300617
-4.4794		-0.335657
-4.65219		-0.373306
-4.82289		-0.412157
-4.98663		-0.451189
-5.15454		-0.488809
-5.32246		-0.524369
-5.42906		-0.559218
-5.59559		-0.595887
-5.76211		-0.635097
-5.92724		-0.676538
-6.10212		-0.716354
-6.26516		-0.758107
-6.43656		-0.798032
-6.6003		-0.836454
-6.71038		-0.874013
-6.88387		-0.912616
-7.04691		-0.953912
-7.21483		-0.997105
-7.38205		-1.0388
-7.55206		-1.08239
-7.71579		-1.12473
-7.88301		-1.16571
-7.9917		-1.20615
-8.15962		-1.24681
-8.32684		-1.28972
-8.48988		-1.33382
-8.66616		-1.37868
-8.82432		-1.42321
-8.99363		-1.46548
-9.10302		-1.50763
-9.27163		-1.55047
-9.43467		-1.59361
-9.60746		-1.6452
-9.77399		-1.69234
-9.93911		-1.7244
-9.7712		-1.73615
-9.60886		-1.73124
-9.43746		-1.72095
-9.27233		-1.71802
-9.10232		-1.7147
-8.99432		-1.71182
-8.83268		-1.70751
-8.66058		-1.70014
-8.49267		-1.69096
-8.32475		-1.68045
-8.15196		-1.67049
-7.99658		-1.66242
-7.87883		-1.65526
-7.7137		-1.64672
-7.55345		-1.63597
-7.37996		-1.62287
-7.21135		-1.61106
-7.04761		-1.59673
-6.87342		-1.58361
-6.71456		-1.57193
-6.5989		-1.56003
-6.43447		-1.5467
-6.26168		-1.53158
-6.09655		-1.51494
-5.93281		-1.50063
-5.7642		-1.48359
-5.59768		-1.4672
-5.42976		-1.45187
-5.32455		-1.43721
-5.15594		-1.42101
-4.99081		-1.40293
-4.81662		-1.38282
-4.64661		-1.3631
-4.48427		-1.34417
-4.31566		-1.32673
-4.20627		-1.30961
-4.03766		-1.29189
-3.87113		-1.27143
-3.69973		-1.24869
-3.5353		-1.22648
-3.36808		-1.20251
-3.20086		-1.18055
-3.03155		-1.1607
-2.92565		-1.14087
-2.75634		-1.12033
-2.58842		-1.09713
-2.42259		-1.07237
-2.25189		-1.04853
-2.08467		-1.0224
-1.9279		-0.997389
-1.7572		-0.974131
-1.64224		-0.951327
-1.47432		-0.927967
-1.31267		-0.902539
-1.13152		-0.875414
-0.978931		-0.848256
-0.810318		-0.82214
-0.644492		-0.796809
-0.530226		-0.774
-0.360219		-0.747365
-0.192303		-0.708698
0.034141		-0.684911
0.03205		-0.671785
-0.087094			-0.984549
0.142833			-0.946505
0.367883			-0.904042
0.59781			-0.859533
0.871632			-0.814257
1.09459			-0.771392
1.31685			-0.728834
1.53006			-0.684626
1.81155			-0.639326
2.0366			-0.593022
2.26095			-0.54618
2.53616			-0.500542
2.76539			-0.452126
2.98417			-0.40309
3.26148			-0.35596
3.48862			-0.305492
3.71227			-0.255095
3.98749			-0.205761
4.21184			-0.157467
4.43202			-0.10923
4.65567			-0.059651
4.93368			-0.007813
5.16291			0.044531
5.38377			0.097817
5.6569			0.149738
5.88195			0.203973
6.10003			0.25815
6.38152			0.312509
6.61214			0.365732
6.82953			0.418525
7.05109			0.471937
7.3291			0.527351
7.55275			0.584311
7.77292			0.642504
8.0558			0.698317
8.28294			0.757001
8.49824			0.815731
8.77833			0.873736
8.99432			0.930522
9.22216			0.987407
9.44373			1.04563
9.72452			1.10596
9.94608			1.16666
10.1725			1.22783
10.4526			1.28782
10.6693			1.35027
10.8951			1.41291
11.1682			1.47358
11.3967			1.53615
11.6204			1.59909
11.897			1.66156
12.1213			1.72401
12.3422			1.78702
12.5666			1.85152
12.8466			1.91689
13.0675			1.9825
13.2877			2.04816
13.5664			2.11198
13.7887			2.17768
14.013			2.24398
14.291			2.30774
14.5168			2.3813
14.7376			2.44906
14.9613			2.49453
14.739			2.51444
14.5181			2.5113
14.2952			2.49927
14.0123			2.4936
13.7873			2.48341
13.565			2.47255
13.2912			2.46301
13.0661			2.45129
12.8432			2.43866
12.5659			2.42578
12.3457			2.41292
12.1199			2.40015
11.897			2.38514
11.6211			2.36885
11.3988			2.35084
11.1717			2.33183
10.8937			2.31345
10.6714			2.29329
10.4429			2.27264
10.1704			2.25441
9.94608			2.23236
9.72452			2.21033
9.44582			2.18777
9.22355			2.16568
9.0006			2.14259
8.77973			2.11825
8.50451			2.09249
8.27737			2.06722
8.0579			2.04069
7.7771			2.0156
7.55275			1.98749
7.3284			1.95968
7.05318			1.93092
6.82604			1.90222
6.60587			1.87317
6.39058			1.84358
6.10282			1.81228
5.87847			1.78109
5.66038			1.74907
5.38656			1.71949
5.15803			1.68624
4.93507			1.65277
4.65707			1.61842
4.43062			1.58514
4.21115			1.55084
3.9847			1.51589
3.71019			1.4794
3.48653			1.4434
3.26984			1.4067
2.98626			1.37178
2.76121			1.33318
2.54313			1.29468
2.26025			1.25731
2.0366			1.21724
1.81642			1.17628
1.53563			1.13578
1.31825			1.09547
1.08693			1.0567
0.869542			1.01654
0.590843			0.974601
0.372064			0.933153
0.148407			0.892736
-0.079429			0.85355
-0.307266			0.811157
-0.530922			0.765854
-0.806138			0.720503
-1.02631			0.676542
-1.24927			0.633532
-1.47641			0.589016
-1.7565			0.543477
-1.96971			0.496322
-2.19754			0.449189
-2.47903			0.403213
-2.7006			0.355008
-2.92425			0.304912
-3.20992			0.256964
-3.42452			0.206149
-3.64887			0.156464
-3.92757			0.106814
-4.14844			0.057948
-4.37767			0.008708
-4.59087			-0.041347
-4.87584			-0.093856
-5.09462			-0.146923
-5.31898			-0.200908
-5.5928			-0.252484
-5.81715			-0.306831
-6.0422			-0.360809
-6.3209			-0.414707
-6.54386			-0.467571
-6.76891			-0.52084
-6.99605			-0.575372
-7.26499			-0.631873
-7.49214			-0.688857
-7.713			-0.746911
-7.98543			-0.803082
-8.21257			-0.862164
-8.43762			-0.920014
-8.71562			-0.977396
-8.9358			-1.03402
-9.16085			-1.09187
-9.37754			-1.15064
-9.66251			-1.211
-9.88686			-1.27162
-10.1084			-1.33356
-10.3878			-1.39334
-10.6115			-1.45623
-10.8323			-1.5188
-11.1124			-1.57967
-11.3368			-1.6416
-11.557			-1.70441
-11.8385			-1.76699
-12.0628			-1.83058
-12.2844			-1.89388
-12.4983			-1.95799
-12.7818			-2.02207
-13.002			-2.08795
-13.2264			-2.15326
-13.5113			-2.21741
-13.7315			-2.28347
-13.9545			-2.35009
-14.2269			-2.41345
-14.4457			-2.48679
-14.6791			-2.55321
-14.8993			-2.59931
-14.6714			-2.61994
-14.454			-2.61749
-14.2276			-2.60508
-13.9531			-2.6002
-13.7315			-2.59085
-13.5106			-2.58108
-13.2278			-2.57158
-13.0034			-2.56063
-12.7777			-2.5487
-12.5018			-2.53692
-12.2872			-2.52416
-12.0586			-2.5117
-11.8364			-2.49704
-11.5563			-2.4814
-11.3368			-2.46347
-11.111			-2.44499
-10.8337			-2.42752
-10.6101			-2.4085
-10.3885			-2.38843
-10.1098			-2.37069
-9.88547			-2.34958
-9.66042			-2.32843
-9.3845			-2.30561
-9.16015			-2.28258
-8.93649			-2.25965
-8.71981			-2.23697
-8.43553			-2.2124
-8.21606			-2.18736
-7.99449			-2.16057
-7.71579			-2.13638
-7.49353			-2.10943
-7.26639			-2.08244
-6.99257			-2.05397
-6.76682			-2.0261
-6.54386			-1.99693
-6.3216			-1.96771
-6.04081			-1.93683
-5.81994			-1.90684
-5.59559			-1.87591
-5.32385			-1.84676
-5.09741			-1.81315
-4.87376			-1.78013
-4.59993			-1.74583
-4.37558			-1.71289
-4.15053			-1.67948
-3.92827			-1.64592
-3.65375			-1.61022
-3.428			-1.57426
-3.20086			-1.53658
-2.92565			-1.50236
-2.70338			-1.46505
-2.47764			-1.42771
-2.19824			-1.39015
-1.9704			-1.35
-1.7565			-1.30921
-1.47432			-1.26982
-1.24997			-1.23035
-1.03676			-1.19175
-0.808925			-1.15555
-0.530922			-1.11363
-0.309356			-1.05587
0.027173			-1.02159
0.028567			-1.00142
-0.085003				-1.29912
0.142833				-1.24678
0.482847				-1.19113
0.819376				-1.13253
1.14406				-1.0726
1.42694				-1.01471
1.7579				-0.953485
2.09582				-0.891533
2.42399				-0.830385
2.70338				-0.768982
3.04131				-0.707887
3.37575				-0.646512
3.65375				-0.58418
3.9861				-0.520078
4.3275				-0.454006
4.64801				-0.387348
4.93786				-0.322942
5.27299				-0.2555
5.60046				-0.187353
5.94117				-0.119038
6.21639				-0.05357
6.54943				0.015782
6.88805				0.085628
7.21901				0.156343
7.5005				0.224708
7.83354				0.296923
8.16241				0.370019
8.50103				0.443556
8.77764				0.51421
9.10859				0.588508
9.44721				0.662881
9.77956				0.737102
10.0603				0.811018
10.3927				0.885805
10.7257				0.961457
11.0072				1.03778
11.3382				1.1151
11.6782				1.19384
12.0085				1.27251
12.2913				1.3495
12.6202				1.42833
12.9526				1.50805
13.2849				1.58841
13.5671				1.66701
13.9022				1.74799
14.236				1.83052
14.5648				1.91343
14.8505				1.99476
15.1856				2.07817
15.5215				2.16203
15.8489				2.24461
16.1325				2.32768
16.4607				2.41066
16.7986				2.49444
17.0745				2.57891
17.4124				2.66552
17.7448				2.75253
18.0827				2.84009
18.353				2.92474
18.6903				3.01226
19.0226				3.09635
19.3647				3.19319
19.6441				3.27999
19.973				3.34067
19.642				3.36443
19.3661				3.35878
19.0233				3.34069
18.6875				3.33318
18.3537				3.32082
18.0827				3.3098
17.7462				3.29428
17.411				3.27741
17.0787				3.26012
16.793				3.24276
16.4607				3.22455
16.1269				3.20621
15.8517				3.1862
15.5208				3.16469
15.1801				3.1408
14.8463				3.11622
14.5683				3.09258
14.2408				3.06563
13.9043				3.03736
13.5643				3.00944
13.2877				2.98247
12.9553				2.953
12.6167				2.9223
12.2927				2.8909
12.0085				2.86095
11.674				2.82797
11.3459				2.79276
11.0037				2.75816
10.7237				2.72312
10.3934				2.68801
10.0603				2.65201
9.78374				2.61569
9.44094				2.57787
9.11138				2.53897
8.78251				2.49864
8.50103				2.45978
8.16171				2.41745
7.82936				2.37494
7.49423				2.33173
7.21692				2.29057
6.88457				2.24617
6.55083				2.20153
6.21639				2.15619
5.93002				2.1128
5.60325				2.0656
5.27578				2.01751
4.93716				1.96837
4.65846				1.92108
4.32402				1.87098
3.99376				1.82066
3.65236				1.76995
3.38202				1.71982
3.03922				1.6697
2.70617				1.61925
2.42817				1.56673
2.09721				1.51228
1.76138				1.45608
1.42555				1.4008
1.14615				1.34735
0.808228				1.28984
0.472395				1.23255
0.146317				1.17745
-0.082216				1.12502
-0.417352				1.06917
-0.753882				1.00992
-1.07857				0.94948
-1.36563				0.891002
-1.69379				0.829165
-2.03381				0.766533
-2.36546				0.705057
-2.64695				0.643685
-2.97721				0.582513
-3.31025				0.519993
-3.59104				0.456533
-3.93105				0.391407
-4.2648				0.325198
-4.59366				0.258059
-4.87376				0.193294
-5.21446				0.125443
-5.54054				0.057034
-5.87568				-0.011662
-6.15508				-0.077699
-6.49091				-0.147023
-6.81908				-0.217861
-7.15979				-0.28958
-7.43709				-0.358767
-7.77014				-0.430833
-8.10945				-0.503752
-8.43902				-0.577218
-8.71423				-0.648226
-9.05006				-0.722169
-9.3845				-0.79656
-9.72312				-0.871572
-9.99764				-0.946253
-10.3356				-1.02073
-10.6644				-1.09565
-10.9417				-1.17278
-11.2783				-1.25073
-11.612				-1.32971
-11.9485				-1.40799
-12.2244				-1.48431
-12.554				-1.56327
-12.8919				-1.64341
-13.2278				-1.72378
-13.5044				-1.80277
-13.8409				-1.88411
-14.1712				-1.96704
-14.5098				-2.04939
-14.7906				-2.13007
-15.1201				-2.21323
-15.4553				-2.29703
-15.7911				-2.38006
-16.067				-2.46327
-16.4022				-2.54582
-16.7352				-2.62936
-17.0118				-2.71373
-17.3518				-2.79996
-17.6793				-2.887
-18.0221				-2.97391
-18.2931				-3.05775
-18.6359				-3.14468
-18.9648				-3.2288
-19.2964				-3.32584
-19.5807				-3.41336
-19.9096				-3.4737
-19.5828				-3.49701
-19.2964				-3.49259
-18.962				-3.47528
-18.6373				-3.46795
-18.2959				-3.45636
-18.02				-3.44531
-17.6849				-3.43032
-17.3497				-3.41433
-17.0132				-3.39769
-16.7352				-3.38138
-16.4035				-3.36442
-16.0712				-3.34657
-15.7925				-3.32708
-15.4574				-3.30578
-15.1271				-3.28216
-14.7857				-3.25799
-14.5105				-3.23503
-14.1781				-3.20947
-13.8395				-3.18261
-13.5072				-3.15515
-13.2236				-3.12874
-12.9017				-3.09995
-12.5575				-3.06948
-12.2321				-3.03873
-11.9478				-3.0092
-11.6183				-2.97651
-11.2831				-2.94202
-10.9438				-2.90768
-10.6672				-2.87334
-10.3286				-2.83965
-9.99973				-2.8053
-9.71616				-2.76968
-9.3852				-2.7316
-9.04728				-2.69224
-8.71702				-2.65266
-8.44041				-2.61479
-8.099				-2.57347
-7.76944				-2.53164
-7.43291				-2.48958
-7.157				-2.44874
-6.82256				-2.40465
-6.48533				-2.35989
-6.15786				-2.31518
-5.87359				-2.27246
-5.54054				-2.22597
-5.21098				-2.17803
-4.87933				-2.12973
-4.59645				-2.08368
-4.25992				-2.03492
-3.93384				-1.98475
-3.59244				-1.93441
-3.31582				-1.88448
-2.97999				-1.83411
-2.64068				-1.78342
-2.36198				-1.73219
-2.03311				-1.67888
-1.70146				-1.62404
-1.36075				-1.56812
-1.08275				-1.51843
-0.751095				-1.46354
-0.417352				-1.3871
0.029263				-1.33986
0.034141				-1.31239
-0.14144					-1.59615
0.20136					-1.53109
0.592933					-1.46208
0.987292					-1.38936
1.42764					-1.3125
1.81155					-1.23722
2.20382					-1.16236
2.59121					-1.09025
2.98139					-1.01345
3.37366					-0.934008
3.82375					-0.85257
4.20836					-0.771892
4.60342					-0.694091
4.99011					-0.616237
5.38238					-0.533542
5.82691					-0.449533
6.2143					-0.365346
6.60517					-0.282287
6.99814					-0.201141
7.39111					-0.116851
7.77292					-0.029792
8.22163					0.058981
8.60902					0.14753
8.9999					0.234049
9.39426					0.318604
9.77677					0.406696
10.1683					0.497572
10.6157					0.590631
11.0037					0.683776
11.3967					0.7756
11.7883					0.864798
12.1743					0.956598
12.5638					1.05123
13.0111					1.14732
13.3992					1.24387
13.7859					1.33875
14.1781					1.43099
14.5648					1.52698
14.962					1.62583
15.4107					1.72588
15.8023					1.82623
16.1869					1.92342
16.5722					2.02074
16.9623					2.12122
17.4117					2.22334
17.8005					2.32489
18.1844					2.42572
18.5774					2.52404
18.9745					2.62595
19.3675					2.72966
19.8065					2.83502
20.1959					2.93949
20.5819					3.04247
20.9763					3.14216
21.3637					3.24578
21.7511					3.35121
22.2026					3.45791
22.59					3.56451
22.9795					3.67048
23.362					3.77361
23.7605					3.87592
24.1479					3.99302
24.5882					4.10508
24.9903					4.18041
24.5966					4.20572
24.1486					4.19156
23.7633					4.1694
23.3731					4.16025
22.9795					4.14858
22.5893					4.13219
22.2012					4.11287
21.7588					4.09123
21.3644					4.06856
20.9749					4.04561
20.5819					4.02462
20.1897					3.99976
19.8037					3.97211
19.3647					3.94243
18.9704					3.91281
18.5809					3.88359
18.19					3.85616
17.8026					3.8235
17.411					3.78801
16.9658					3.75113
16.5749					3.7144
16.1876					3.67926
15.796					3.64274
15.4058					3.60209
14.9599					3.56076
14.5732					3.51846
14.1844					3.47676
13.7831					3.43694
13.3957					3.39365
13.0132					3.34744
12.5672					3.29963
12.1757					3.25079
11.7876					3.20372
11.3995					3.15867
11.0044					3.10993
10.6143					3.05841
10.169					3.00556
9.78095					2.95161
9.39147					2.89857
8.9985					2.84729
8.60972					2.79332
8.21745					2.73699
7.77014					2.6783
7.37926					2.61933
6.99744					2.56189
6.60378					2.50649
6.21639					2.44722
5.8276					2.38519
5.38168					2.32116
4.99081					2.25696
4.60272					2.19554
4.21184					2.13324
3.82166					2.06721
3.37575					1.9999
2.98278					1.93245
2.59748					1.86535
2.20591					1.8006
1.81573					1.73267
1.42833					1.66237
0.979628					1.58861
0.591539					1.51671
0.204147					1.44729
-0.137956					1.38114
-0.528135					1.31076
-0.921101					1.2368
-1.36772					1.15976
-1.7572					1.08442
-2.14041					1.00792
-2.53477					0.933811
-2.92356					0.856658
-3.3207					0.777755
-3.76035					0.696662
-4.14983					0.615131
-4.53792					0.536148
-4.93089					0.457396
-5.32037					0.374101
-5.76559					0.289554
-6.1502					0.205063
-6.54386					0.121713
-6.92986					0.040102
-7.32073					-0.045006
-7.71649					-0.132985
-8.15823					-0.221828
-8.5491					-0.310574
-8.93649					-0.398031
-9.33085					-0.483592
-9.71476					-0.571929
-10.1098					-0.663555
-10.5536					-0.757001
-10.9417					-0.850491
-11.3396					-0.941629
-11.7291					-1.03056
-12.113					-1.1234
-12.5018					-1.21896
-12.956					-1.31503
-13.3386					-1.4108
-13.728					-1.50568
-14.1196					-1.5991
-14.5098					-1.69573
-14.9007					-1.79406
-15.3473					-1.89373
-15.7375					-1.99406
-16.1207					-2.09092
-16.5129					-2.18755
-16.9017					-2.28825
-17.3497					-2.39089
-17.7385					-2.49339
-18.1329					-2.59404
-18.5203					-2.69171
-18.9063					-2.79318
-19.3062					-2.8968
-19.7389					-3.00143
-20.1325					-3.1055
-20.5234					-3.20839
-20.9192					-3.30829
-21.2982					-3.41111
-21.6947					-3.5161
-22.1399					-3.62338
-22.5349					-3.73032
-22.9174					-3.83497
-23.3083					-3.93633
-23.7013					-4.03775
-24.0838					-4.15512
-24.5388					-4.2671
-24.9262					-4.34218
-24.5346					-4.36721
-24.0915					-4.354
-23.6978					-4.33233
-23.3111					-4.32325
-22.9181					-4.31194
-22.5328					-4.29642
-22.1399					-4.27811
-21.6947					-4.25704
-21.3045					-4.23477
-20.9178					-4.21312
-20.5241					-4.19334
-20.1367					-4.16932
-19.7431					-4.14274
-19.3006					-4.11398
-18.9125					-4.0846
-18.5231					-4.05529
-18.1329					-4.02761
-17.7434					-3.99664
-17.3497					-3.96283
-16.9066					-3.92618
-16.5095					-3.88908
-16.1235					-3.85447
-15.7312					-3.81949
-15.3459					-3.78033
-14.8972					-3.73914
-14.507					-3.69757
-14.1238					-3.6572
-13.7343					-3.61819
-13.3379					-3.57492
-12.9456					-3.52924
-12.5066					-3.48226
-12.1172					-3.43512
-11.7256					-3.38838
-11.3396					-3.34354
-10.941					-3.29565
-10.555					-3.24547
-10.1056					-3.19297
-9.71546					-3.13986
-9.32737					-3.08756
-8.93928					-3.03748
-8.54562					-2.98356
-8.15962					-2.9269
-7.713					-2.86911
-7.32491					-2.81159
-6.93474					-2.75459
-6.54107					-2.69955
-6.15856					-2.64119
-5.7642					-2.58027
-5.32246					-2.51721
-4.93159					-2.45321
-4.54141					-2.3924
-4.15262					-2.33138
-3.75896					-2.26608
-3.31234					-2.19872
-2.92147					-2.13192
-2.53895					-2.06631
-2.14459					-2.00302
-1.7565					-1.93432
-1.36493					-1.86903
-0.918314					-1.79696
-0.529529					-1.70018
0.02996					-1.6425
0.02787					-1.60902
-0.19509						-1.87941
0.250829						-1.79855
0.705109						-1.71337
1.21443						-1.62433
1.69798						-1.53242
2.14599						-1.44174
2.65043						-1.35418
3.09565						-1.26292
3.59731						-1.1707
4.10176						-1.07734
4.54559						-0.98311
5.04307						-0.889976
5.49525						-0.792894
5.99343						-0.693625
6.4923						-0.596197
6.9417						-0.49517
7.44127						-0.39593
7.94154						-0.293887
8.38815						-0.193226
8.89121						-0.094478
9.33503						0.008073
9.83391						0.113678
10.3349						0.219892
10.7836						0.327408
11.2859						0.43222
11.7339						0.540557
12.2349						0.648694
12.7289						0.757595
13.1741						0.866513
13.6834						0.974056
14.1266						1.08542
14.6241						1.19876
15.1271						1.31218
15.5709						1.42661
16.0712						1.53815
16.5213						1.65315
17.0216						1.7686
17.5183						1.88467
17.9691						1.99983
18.4666						2.11278
18.9118						2.22969
19.417						2.3495
19.9179						2.46782
20.3618						2.58921
20.8655						2.70801
21.3686						2.82886
21.8082						2.94887
22.3092						3.06583
22.7572						3.18554
23.2609						3.30685
23.7626						3.42858
24.2106						3.55074
24.7039						3.67024
25.1477						3.79379
25.6536						3.91799
26.1525						4.04212
26.606						4.16455
27.1014						4.28411
27.5508						4.40612
28.0441						4.52932
28.5458						4.64868
28.9959						4.78511
29.4941						4.91156
29.9428						4.99678
29.4948						5.02753
28.9924						5.01426
28.5514						4.98768
28.0518						4.97416
27.5452						4.95322
27.0972						4.93128
26.6005						4.91029
26.1573						4.88648
25.6543						4.86024
25.1526						4.83255
24.7053						4.80366
24.2002						4.77526
23.7612						4.74177
23.2547						4.70669
22.7579						4.66979
22.3085						4.63289
21.8089						4.59718
21.3707						4.55811
20.8655						4.51701
20.368						4.47671
19.9152						4.43244
19.4184						4.38881
18.9167						4.34154
18.4666						4.29397
17.9698						4.2471
17.5218						4.19647
17.0146						4.14457
16.5081						4.09294
16.0754						4.04071
15.5744						3.99017
15.1208						3.93536
14.6303						3.8785
14.1259						3.81983
13.6751						3.76025
13.1804						3.70158
12.7373						3.64011
12.237						3.57739
11.7284						3.51437
11.2866						3.45049
10.7871						3.38926
10.3328						3.32368
9.82903						3.25656
9.33364						3.18699
8.88563						3.11678
8.38328						3.04811
7.94502						2.97601
7.43918						2.90244
6.9417						2.83103
6.49787						2.75583
5.99343						2.6822
5.48968						2.60539
5.05003						2.52823
4.54419						2.45261
4.09758						2.37279
3.59731						2.29033
3.09635						2.20787
2.64904						2.12548
2.1439						2.04636
1.70146						1.96353
1.19701						1.8783
0.699535						1.79305
0.259887						1.70909
-0.192303						1.62649
-0.641705						1.5395
-1.14267						1.44903
-1.63875						1.35676
-2.08815						1.26531
-2.58981						1.17698
-3.03155						1.08495
-3.53739						0.991974
-4.03626						0.897213
-4.48636						0.801805
-4.98384						0.707505
-5.42767						0.609688
-5.9349						0.509291
-6.44074						0.410082
-6.8776						0.308056
-7.37578						0.209148
-7.87953						0.107553
-8.32614						0.005945
-8.82571						-0.093808
-9.27163						-0.19735
-9.77677						-0.303254
-10.2763						-0.410296
-10.7202						-0.518735
-11.2225						-0.624262
-11.6657						-0.732752
-12.1708						-0.841559
-12.6697						-0.950944
-13.1149						-1.05967
-13.6221						-1.16706
-14.066						-1.27826
-14.5627						-1.39236
-15.0644						-1.5068
-15.5117						-1.62161
-16.0127						-1.73368
-16.4551						-1.84899
-16.9575						-1.96411
-17.4598						-2.07975
-17.9057						-2.19482
-18.4109						-2.30852
-18.8554						-2.42524
-19.3543						-2.54424
-19.8552						-2.66208
-20.3012						-2.78406
-20.8028						-2.90305
-21.3024						-3.02379
-21.7518						-3.14259
-22.2437						-3.25944
-22.6938						-3.37857
-23.1996						-3.49925
-23.6985						-3.62016
-24.1451						-3.7424
-24.6475						-3.86189
-25.0927						-3.98452
-25.593						-4.10721
-26.0883						-4.23064
-26.5412						-4.35245
-27.0401						-4.47145
-27.4888						-4.5921
-27.9905						-4.71465
-28.4907						-4.83298
-28.929						-4.96844
-29.4376						-5.0937
-29.8787						-5.17886
-29.4279						-5.20982
-28.9304						-5.1971
-28.488						-5.16975
-27.9807						-5.15615
-27.4846						-5.13598
-27.0408						-5.11505
-26.5496						-5.09476
-26.0967						-5.07137
-25.5902						-5.0458
-25.0934						-5.0191
-24.6447						-4.99087
-24.143						-4.96392
-23.6971						-4.93166
-23.1961						-4.89712
-22.7035						-4.86016
-22.25						-4.8234
-21.7497						-4.78845
-21.3017						-4.75059
-20.7979						-4.71002
-20.3046						-4.67065
-19.8497						-4.62753
-19.355						-4.58499
-18.8519						-4.53827
-18.4053						-4.49079
-17.9071						-4.44419
-17.4619						-4.39482
-16.9568						-4.34368
-16.4579						-4.29246
-16.0148						-4.24081
-15.5096						-4.19178
-15.0735						-4.13784
-14.5634						-4.08226
-14.0667						-4.02393
-13.6179						-3.96533
-13.1128						-3.90756
-12.669						-3.84689
-12.1736						-3.78457
-11.6664						-3.72302
-11.2218						-3.66044
-10.7264						-3.60028
-10.2763						-3.53548
-9.77817						-3.46932
-9.27163						-3.4007
-8.8278						-3.3312
-8.32823						-3.26266
-7.87883						-3.19183
-7.38484						-3.11889
-6.87551						-3.04805
-6.43656						-2.97393
-5.93351						-2.90128
-5.42697						-2.82533
-4.98872						-2.74894
-4.48567						-2.67349
-4.03975						-2.59516
-3.53251						-2.51422
-3.03504						-2.43233
-2.58772						-2.35027
-2.08955						-2.27025
-1.64642						-2.19478
-1.14336						-2.11046
-0.637525						-1.99481
0.031354						-1.92447
0.034837						-1.88305
-0.253616							-2.13952
0.307963							-2.03945
0.873722							-1.93809
1.42903							-1.83664
1.98364							-1.73384
2.54174							-1.62934
3.09496							-1.52222
3.65584							-1.41503
4.20975							-1.30684
4.77133							-1.19834
5.32525							-1.08857
5.87707							-0.978427
6.44004							-0.866817
6.99814							-0.754965
7.54648							-0.640669
8.10736							-0.525443
8.66894							-0.408887
9.22077							-0.291547
9.77817							-0.172222
10.3377							-0.052951
10.8958							0.067699
11.4532							0.188451
12.0099							0.309193
12.5686							0.432012
13.1205							0.558677
13.7301							0.687139
14.2924							0.816646
14.8505							0.944209
15.4093							1.07111
15.9639							1.19907
16.5143							1.32799
17.0752							1.45786
17.6284							1.58844
18.19							1.71817
18.7432							1.8499
19.2985							1.98222
19.8629							2.11575
20.4196							2.24931
20.9714							2.38376
21.5337							2.51784
22.0883							2.65281
22.6471							2.78678
23.1996							2.92168
23.7542							3.057
24.3221							3.19378
24.8739							3.33074
25.4278							3.46668
25.9873							3.60451
26.551							3.74531
27.1579							3.88626
27.7104							4.0265
28.2761							4.16412
28.8245							4.29992
29.3861							4.43675
29.9442							4.57425
30.4995							4.71187
31.0534							4.85072
31.6143							4.98907
32.1682							5.12769
32.7221							5.26565
33.2788							5.39853
33.8411							5.54943
34.3943							5.69055
34.9524							5.78426
34.3936							5.81632
33.8446							5.79876
33.2767							5.76768
32.7228							5.75246
32.1626							5.73076
31.6177							5.70619
31.0541							5.67952
30.4932							5.64985
29.9379							5.61861
29.384							5.58537
28.8294							5.55133
28.2706							5.51629
27.7104							5.47911
27.1599							5.43792
26.5461							5.39437
25.9859							5.34905
25.4327							5.30439
24.876							5.25951
24.3158							5.21184
23.7612							5.16204
23.2038							5.1119
22.6506							5.06064
22.0911							5.00898
21.5337							4.95529
20.9756							4.89992
20.4175							4.84248
19.858							4.78401
19.3048							4.72362
18.7481							4.66218
18.1886							4.59883
17.6319							4.53556
17.0745							4.47023
16.5164							4.40446
15.9632							4.33722
15.4086							4.26908
14.8484							4.2
14.2889							4.12771
13.7364							4.05116
13.1184							3.9734
12.5693							3.8944
12.0078							3.81752
11.4545							3.74089
10.8937							3.66293
10.3356							3.58322
9.78095							3.50266
9.21519							3.41968
8.66755							3.33629
8.10876							3.25096
7.55206							3.16475
6.99884							3.07638
6.43586							2.98806
5.87847							2.8986
5.32873							2.80913
4.77412							2.7184
4.20627							2.62692
3.65932							2.53262
3.09565							2.43733
2.53547							2.34019
1.98364							2.24251
1.42833							2.1436
0.870239							2.04433
0.312143							1.94344
-0.245952							1.84232
-0.805441							1.73971
-1.36632							1.63684
-1.91884							1.53199
-2.47764							1.42619
-3.03852							1.3188
-3.59383							1.21018
-4.15123							1.09989
-4.70793							0.989854
-5.26811							0.87896
-5.81855							0.767978
-6.37594							0.65527
-6.93961							0.541503
-7.49632							0.425961
-8.04535							0.310051
-8.60554							0.192245
-9.15736							0.073984
-9.71894							-0.046214
-10.2763							-0.165839
-10.8323							-0.287289
-11.3939							-0.409073
-11.9458							-0.530766
-12.5045							-0.654026
-13.0647							-0.781215
-13.6786							-0.909849
-14.2367							-1.03991
-14.7864							-1.16853
-15.3424							-1.29714
-15.9033							-1.42601
-16.4642							-1.5553
-17.0153							-1.68379
-17.572							-1.81417
-18.128							-1.94474
-18.6861							-2.07709
-19.2442							-2.20931
-19.7967							-2.34289
-20.3569							-2.47666
-20.9143							-2.61174
-21.4682							-2.74533
-22.0291							-2.87966
-22.5851							-3.01336
-23.1369							-3.14767
-23.6936							-3.28209
-24.2531							-3.41795
-24.8105							-3.55431
-25.3784							-3.6909
-25.9309							-3.82845
-26.4855							-3.96766
-27.0972							-4.10703
-27.6525							-4.24577
-28.2086							-4.3822
-28.7597							-4.51754
-29.3247							-4.65335
-29.8724							-4.78995
-30.434							-4.92664
-30.9893							-5.0639
-31.5516							-5.20141
-32.1083							-5.33885
-32.6615							-5.47508
-33.2231							-5.60611
-33.7763							-5.75481
-34.3351							-5.89409
-34.8932							-5.98696
-34.3358							-6.01838
-33.7777							-6.00103
-33.2196							-5.97091
-32.665							-5.95616
-32.1055							-5.93501
-31.5453							-5.91023
-30.9942							-5.88375
-30.4347							-5.85478
-29.8766							-5.82417
-29.3171							-5.79134
-28.7604							-5.7577
-28.2155							-5.72361
-27.6539							-5.68744
-27.0924							-5.64769
-26.4827							-5.60528
-25.9246							-5.56086
-25.3742							-5.51714
-24.8105							-5.47166
-24.2531							-5.42415
-23.695							-5.37527
-23.1474							-5.32624
-22.583							-5.276
-22.0298							-5.225
-21.4696							-5.17175
-20.9157							-5.11794
-20.3562							-5.06097
-19.7939							-5.00294
-19.2442							-4.94323
-18.6875							-4.88265
-18.1294							-4.82032
-17.5727							-4.75735
-17.0097							-4.69282
-16.4558							-4.62862
-15.9047							-4.56335
-15.3466							-4.49606
-14.7829							-4.42728
-14.2318							-4.35561
-13.6737							-4.28031
-13.0585							-4.20391
-12.5011							-4.12667
-11.9541							-4.05096
-11.3925							-3.97568
-10.831							-3.89817
-10.277							-3.81958
-9.72103							-3.74042
-9.16085							-3.659
-8.60345							-3.57635
-8.04466							-3.49138
-7.49423							-3.40535
-6.93404							-3.31857
-6.37664							-3.2317
-5.81994							-3.14352
-5.26811							-3.05511
-4.70932							-2.96507
-4.14635							-2.87453
-3.59661							-2.78151
-3.03922							-2.68719
-2.47903							-2.5897
-1.92024							-2.50124
-1.36005							-2.40237
-0.810318							-2.26591
0.034141							-2.18285
0.02996							-2.13264
-0.250133								-2.36694
0.31075								-2.25712
0.977538								-2.14332
1.59625								-2.02815
2.26025								-1.90753
2.87687								-1.78902
3.54157								-1.66695
4.15541								-1.54545
4.82568								-1.42021
5.43115								-1.29412
6.10212								-1.16904
6.71526								-1.04396
7.32631								-0.917815
7.99449								-0.790112
8.60972								-0.659648
9.27511								-0.526497
9.88825								-0.393713
10.5655								-0.257314
11.1696								-0.122242
11.8447								0.015721
12.4558								0.15219
13.1205								0.291813
13.7364								0.430332
14.4039								0.571816
15.017								0.712471
15.6852								0.856699
16.2907								0.99977
16.963								1.14596
17.5797								1.2913
18.2395								1.43914
18.8603								1.58638
19.5285								1.73255
20.1374								1.87841
20.7471								2.02555
21.4215								2.17451
22.0347								2.32525
22.7022								2.47667
23.3146								2.62645
23.9814								2.77925
24.5945								2.93015
25.2648								3.08289
25.8738								3.23412
26.5503								3.3875
27.1551								3.53798
27.8267								3.69052
28.4392								3.84173
29.1039								3.99589
29.7177								4.14849
30.3824								4.30248
30.9997								4.45394
31.6637								4.60663
32.2817								4.75904
32.945								4.91005
33.5645								5.05994
34.1734								5.21041
34.843								5.36145
35.4547								5.51288
36.1236								5.66495
36.7361								5.8159
37.3973								5.96868
38.0118								6.11325
38.6835								6.27951
39.2994								6.43267
39.9683								6.53557
39.2945								6.56643
38.6849								6.54506
38.0097								6.50756
37.4084								6.48979
36.7326								6.46182
36.1194								6.43275
35.4575								6.39981
34.8423								6.36584
34.1727								6.33076
33.5638								6.29377
32.9485								6.25501
32.2734								6.21381
31.6651								6.16996
30.9942								6.12431
30.3796								6.07863
29.7198								6.02968
29.0997								5.97982
28.4385								5.92542
27.8246								5.87115
27.1634								5.81451
26.5489								5.7586
25.8807								5.69934
25.2662								5.6397
24.5973								5.57634
23.9807								5.51334
23.3104								5.44716
22.7042								5.38061
22.027								5.31148
21.4208								5.24114
20.7554								5.1694
20.1437								5.09717
19.5285								5.02455
18.8589								4.94984
18.2423								4.87312
17.5804								4.79375
16.9609								4.71415
16.2949								4.63114
15.6831								4.54862
15.0135								4.46262
14.4025								4.37767
13.7392								4.28957
13.1233								4.20179
12.4537								4.11008
11.8385								4.01973
11.1696								3.92652
10.5641								3.83407
9.88825								3.73711
9.2786								3.64038
8.6146								3.54074
8.00076								3.4406
7.33049								3.33993
6.71735								3.23938
6.11118								3.138
5.43812								3.03478
4.82498								2.92817
4.15123								2.81928
3.54575								2.71071
2.87269								2.59976
2.25886								2.49015
1.5865								2.37474
0.980325								2.26166
0.309356								2.1476
-0.243862								2.03544
-0.919011								1.91946
-1.53772								1.80278
-2.20242								1.6816
-2.81208								1.56159
-3.48026								1.43697
-4.09409								1.31263
-4.76646								1.1864
-5.37402								1.0605
-6.04708								0.934596
-6.65534								0.807501
-7.2636								0.679309
-7.93945								0.549223
-8.55328								0.417103
-9.21659								0.282262
-9.82764								0.148501
-10.5042								0.011543
-11.1041								-0.125228
-11.7799								-0.264786
-12.3952								-0.402552
-13.0633								-0.543165
-13.673								-0.682099
-14.3426								-0.825277
-14.9543								-0.967603
-15.6246								-1.11245
-16.237								-1.25585
-16.9024								-1.40244
-17.5156								-1.54737
-18.1851								-1.69506
-18.8004								-1.84275
-19.4713								-1.99009
-20.0761								-2.13678
-20.6934								-2.28306
-21.3651								-2.43069
-21.9706								-2.58133
-22.6374								-2.73302
-23.2491								-2.88318
-23.9173								-3.03506
-24.5311								-3.18503
-25.2028								-3.33743
-25.8173								-3.4875
-26.4813								-3.63902
-27.1007								-3.78946
-27.7689								-3.94192
-28.3772								-4.09293
-29.0453								-4.24499
-29.6578								-4.39516
-30.3253								-4.54768
-30.9301								-4.69789
-31.6052								-4.84886
-32.2169								-4.99951
-32.8851								-5.14881
-33.5011								-5.29709
-34.1135								-5.44467
-34.7761								-5.59392
-35.3885								-5.74492
-36.0567								-5.89595
-36.6706								-6.04415
-37.3318								-6.19294
-37.9512								-6.33436
-38.6249								-6.49895
-39.2402								-6.65062
-39.9049								-6.75247
-39.2402								-6.78294
-38.6208								-6.7619
-37.954								-6.7241
-37.338								-6.70603
-36.6699								-6.67895
-36.0609								-6.65133
-35.3899								-6.61929
-34.7775								-6.58483
-34.1114								-6.5486
-33.4962								-6.51279
-32.8865								-6.47542
-32.2176								-6.43542
-31.6017								-6.39206
-30.9363								-6.34639
-30.3253								-6.3009
-29.6536								-6.25177
-29.0433								-6.2018
-28.3765								-6.14921
-27.7592								-6.09652
-27.0965								-6.0399
-26.482								-5.98367
-25.818								-5.92492
-25.1986								-5.86662
-24.536								-5.80467
-23.9187								-5.74238
-23.2505								-5.67672
-22.6346								-5.61164
-21.9754								-5.54364
-21.3588								-5.47353
-20.6906								-5.40372
-20.0817								-5.33367
-19.472								-5.26252
-18.7983								-5.18848
-18.1837								-5.11194
-17.5176								-5.0339
-16.9059								-4.95632
-16.2294								-4.87424
-15.6281								-4.79267
-14.9571								-4.70741
-14.3405								-4.62359
-13.6737								-4.53619
-13.0633								-4.44972
-12.3986								-4.36048
-11.7771								-4.27199
-11.1117								-4.17917
-10.4979								-4.08673
-9.83042								-3.9907
-9.21937								-3.89613
-8.54771								-3.79851
-7.94224								-3.69958
-7.26639								-3.60021
-6.65743								-3.50095
-6.0415								-3.40053
-5.3775								-3.29825
-4.75949								-3.19395
-4.09549								-3.08727
-3.48026								-2.9804
-2.81417								-2.86854
-2.19615								-2.76758
-1.53563								-2.65568
-0.919011								-2.50181
0.028567								-2.40757
0.030657								-2.3508
